# Supplementary material
Source: ML conference proceedings conference paper supplement (https://openreview.net/forum?id=ayT4e9C3Gd)

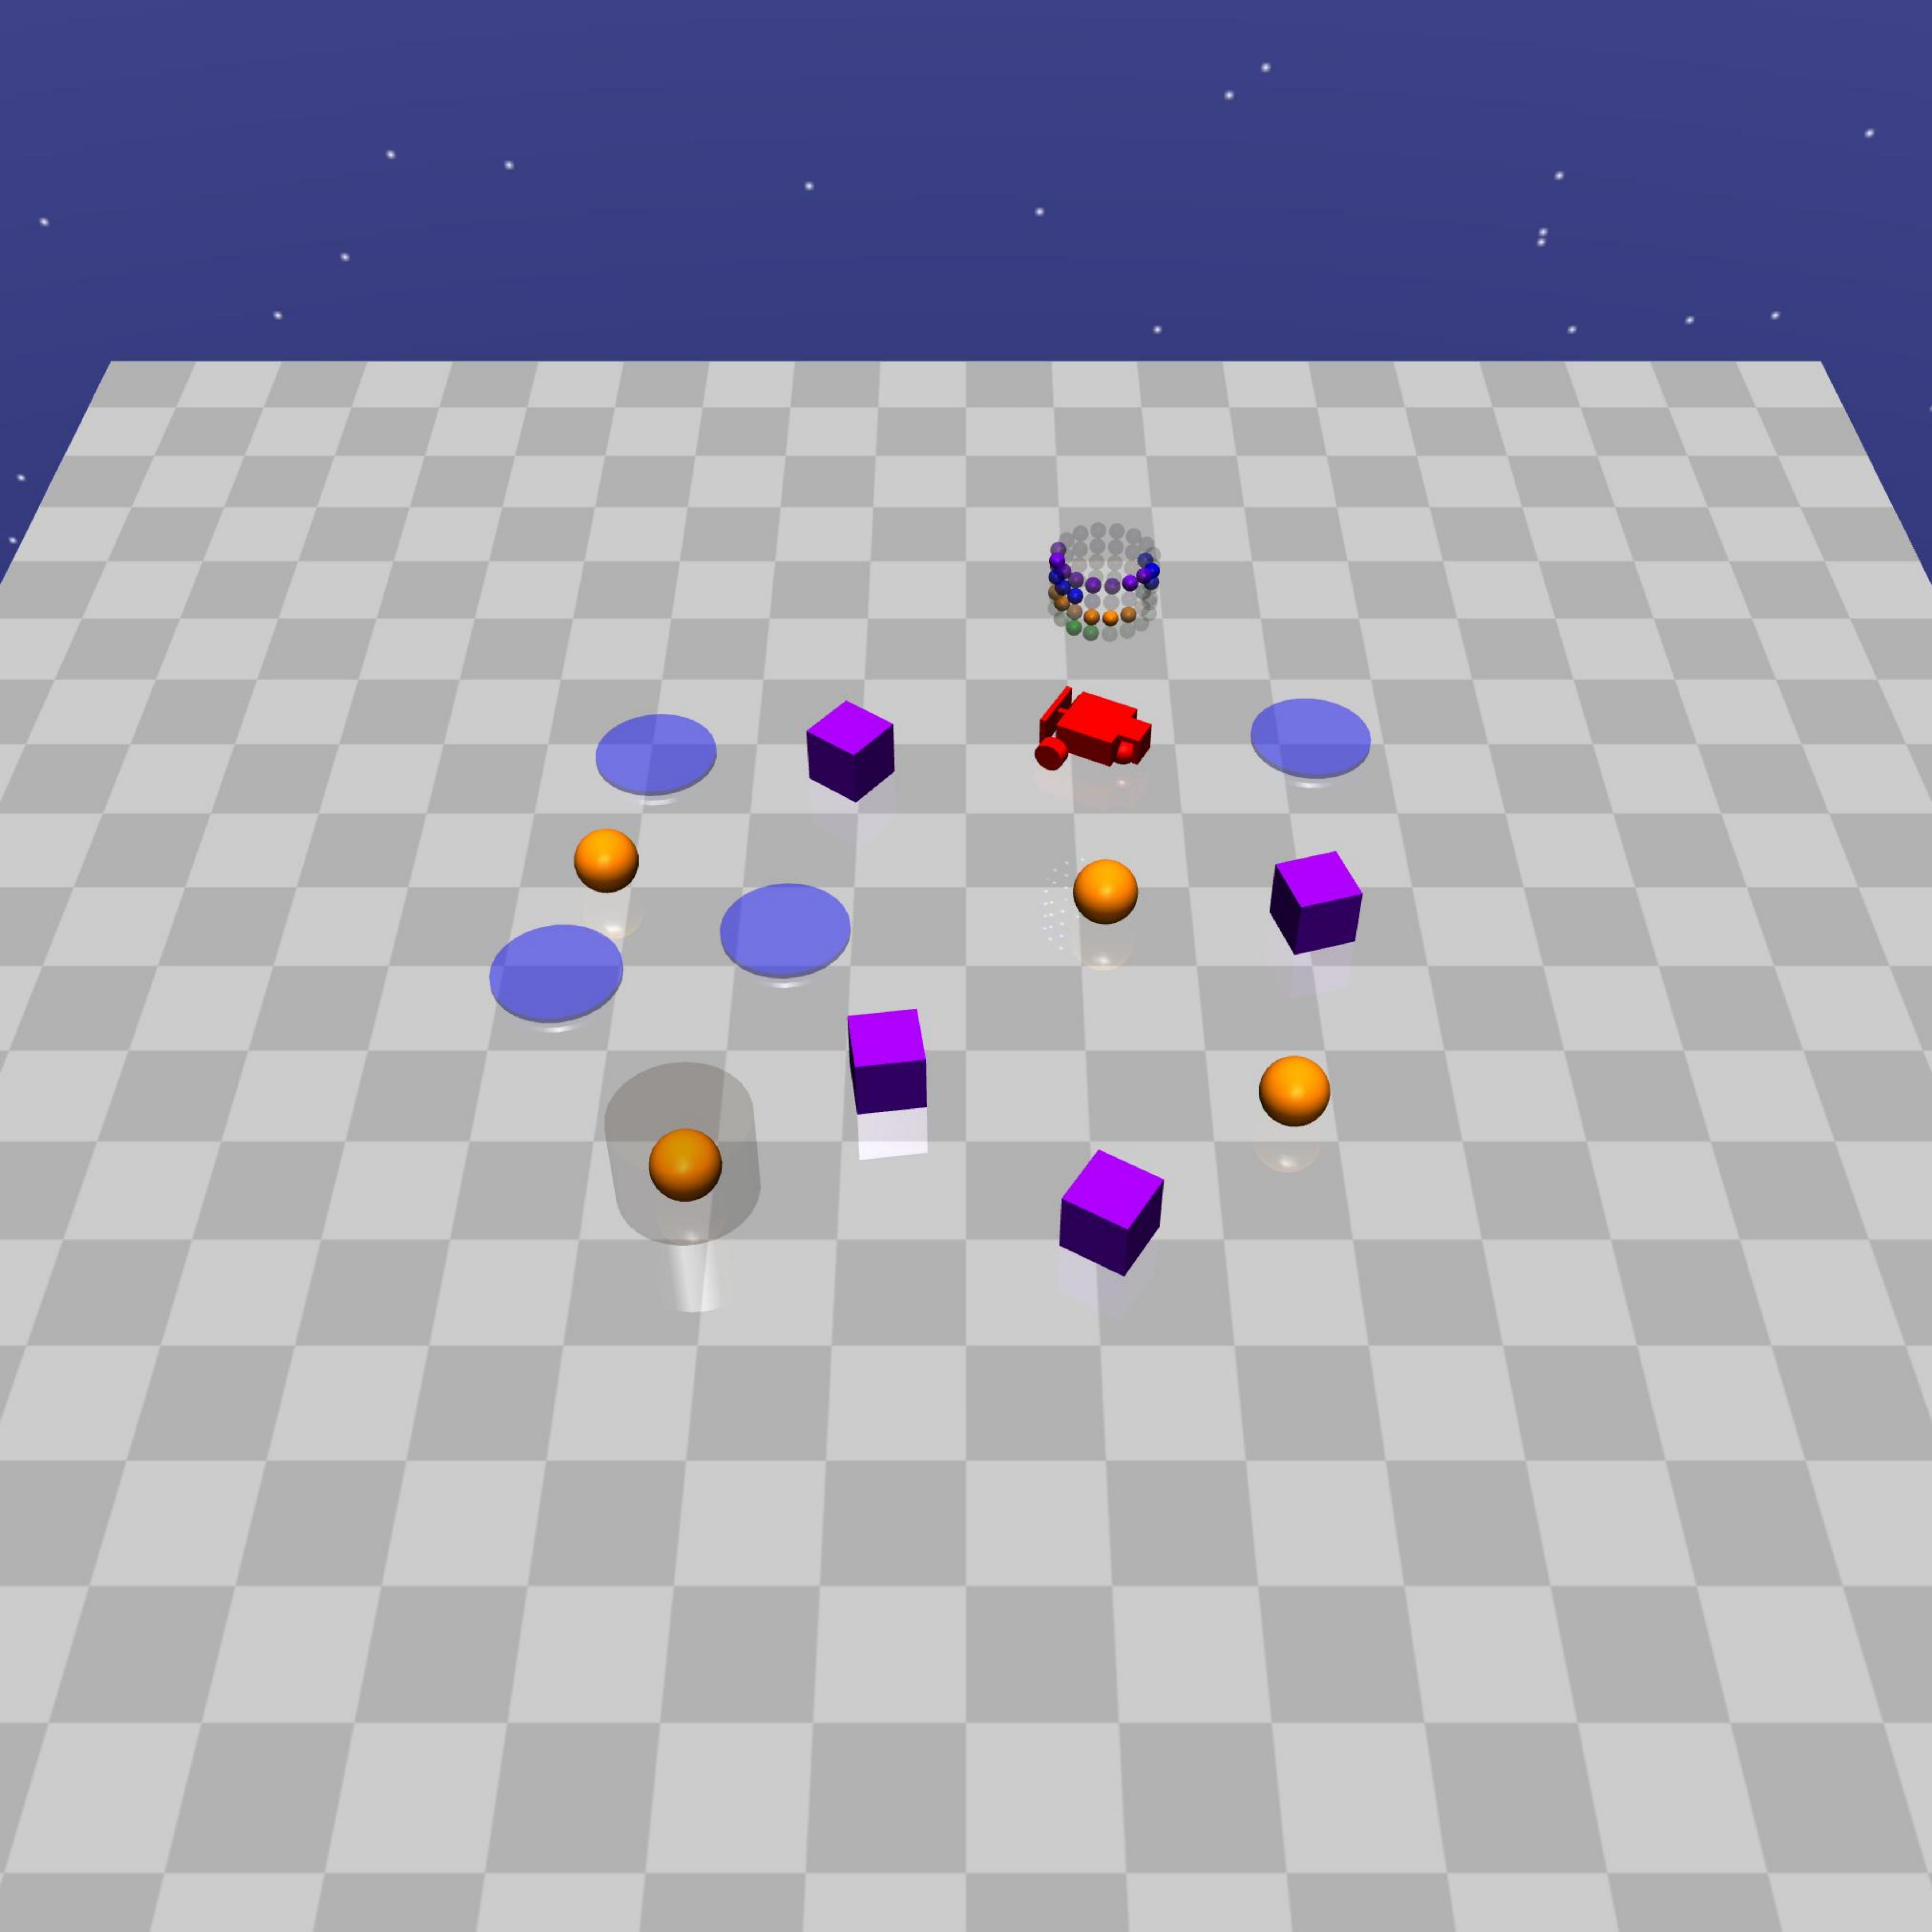

Supplement: supplementary_material [file attachment]

Penalty  $\in [-50\ 0]$

$p \in [0\ 1]$

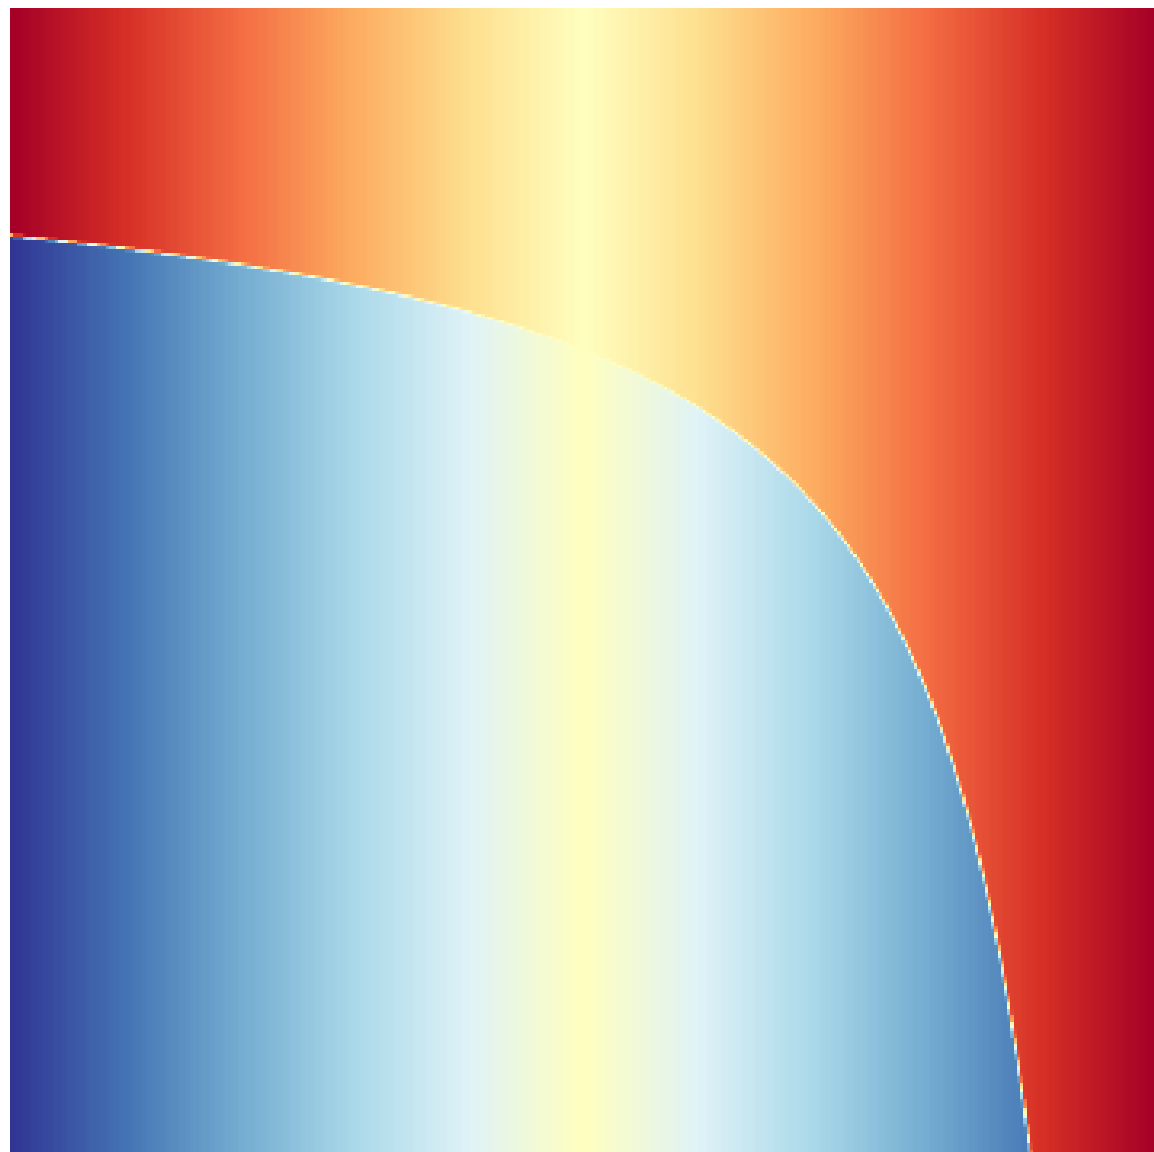

1.0

0.8

0.6

0.4

0.2

0.0

Supplement: supplementary_material [file attachment]

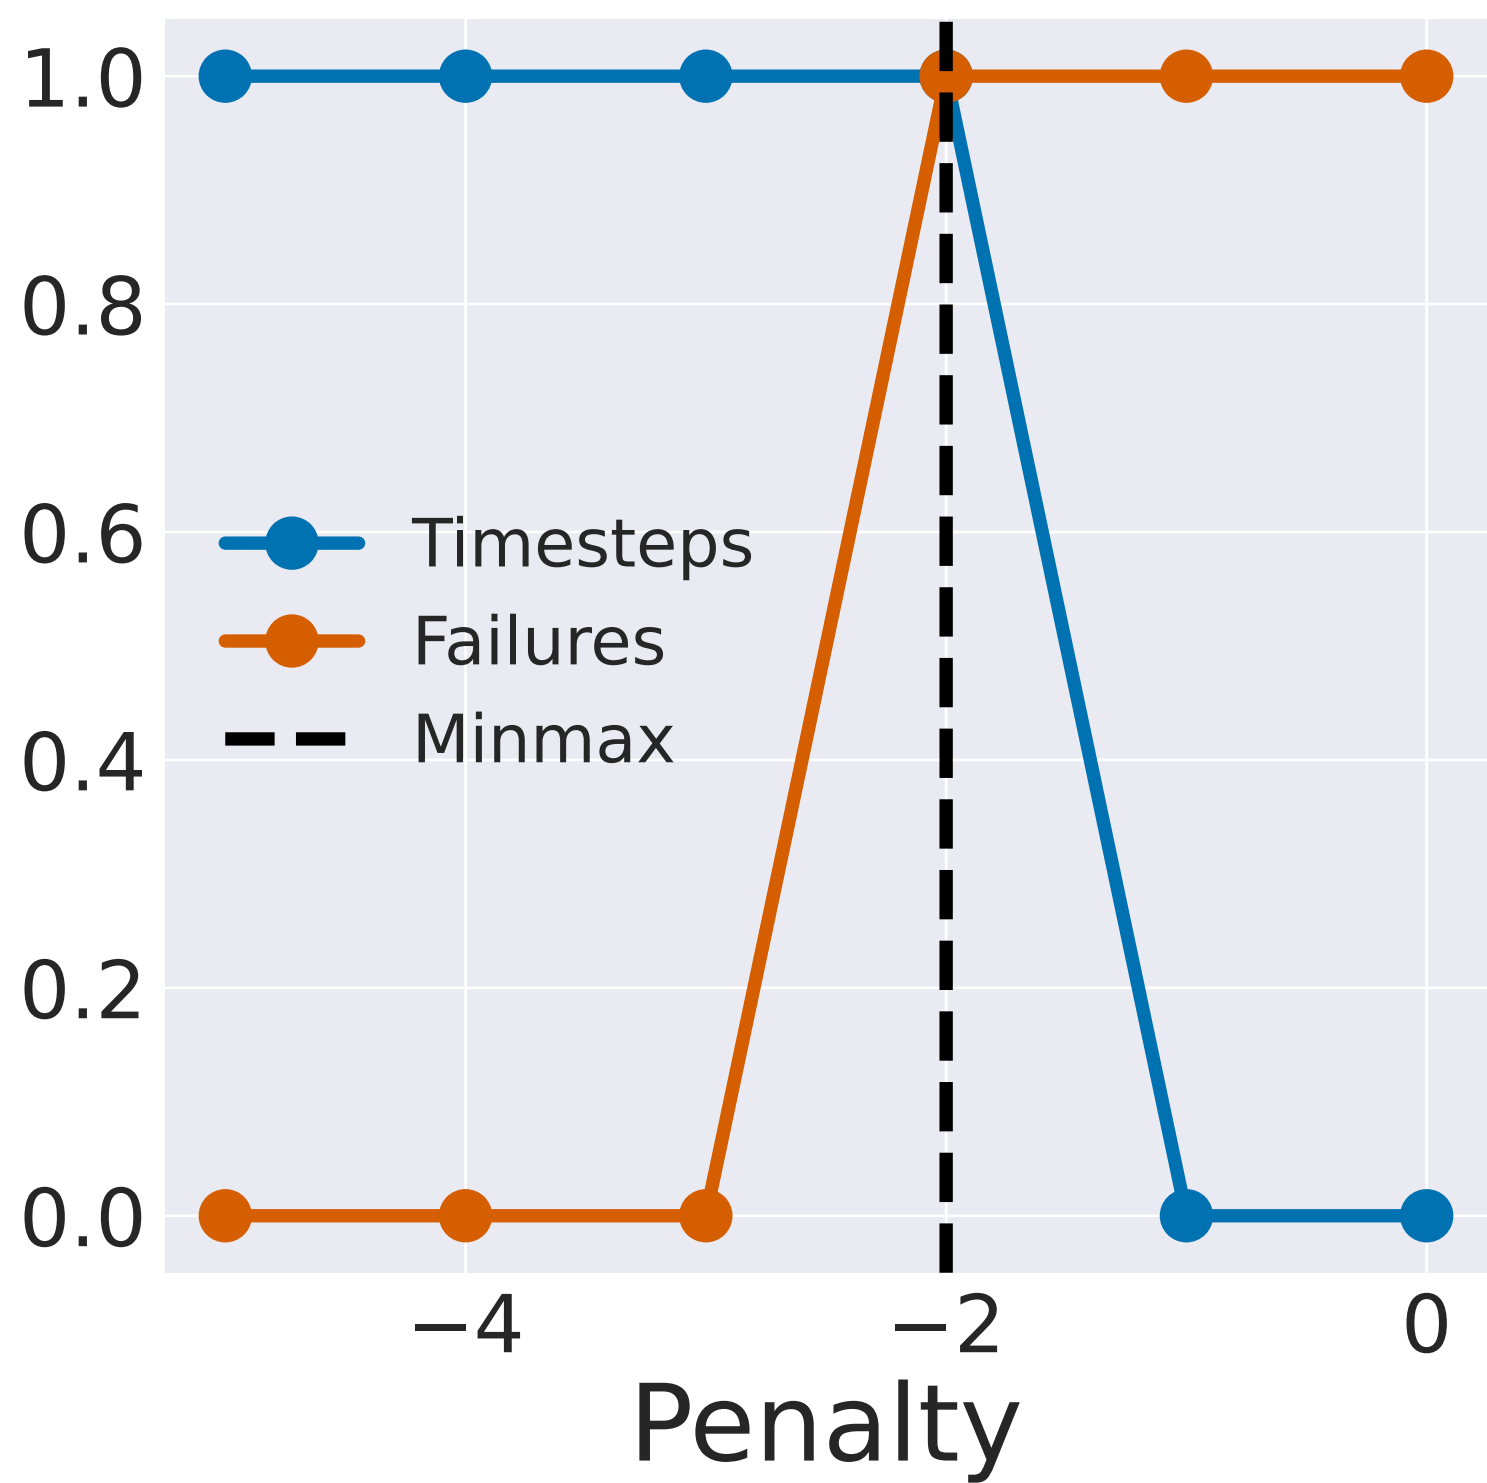

Supplement: supplementary_material [file attachment]

Penalty  $\in [-10\ 0]$

$p_1 = 0, p_2 \in [0\ 1]$

1.0

0.8

0.6

0.4

0.2

0.0

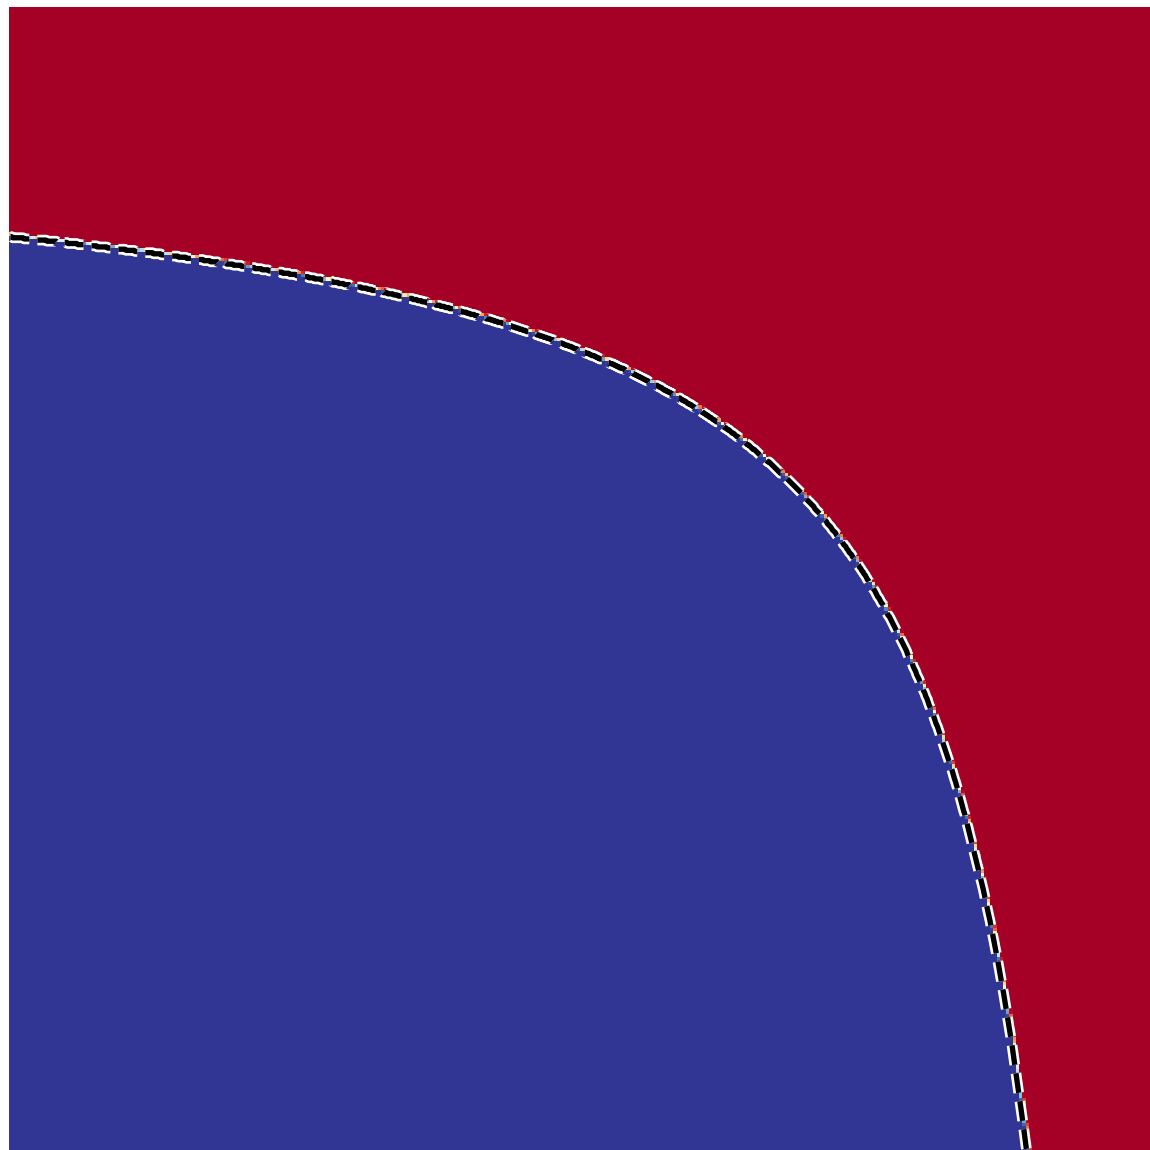

Supplement: supplementary_material [file attachment]

Penalty  $\in [-10\ 0]$

$R_{step} \in [-1\ 0]$

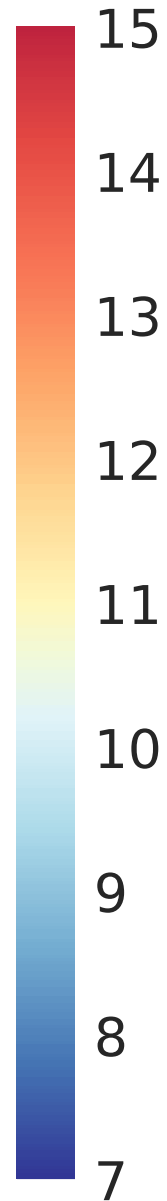

Supplement: supplementary_material [file attachment]

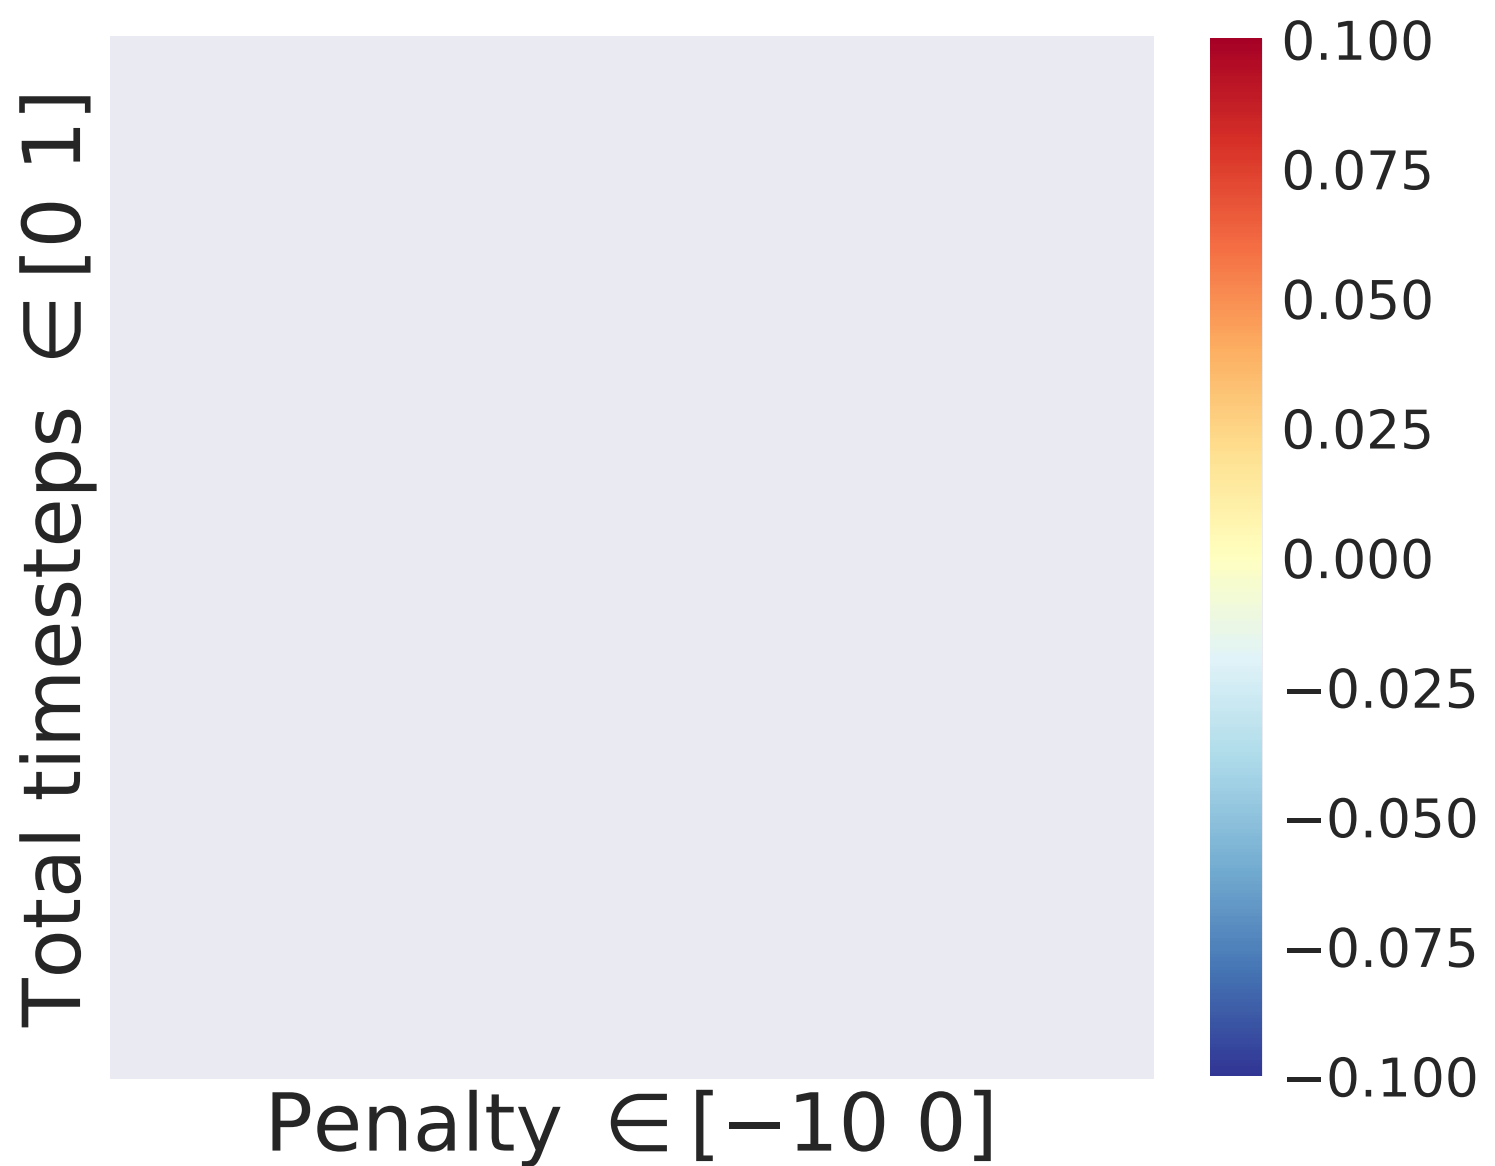

Supplement: supplementary_material [file attachment]

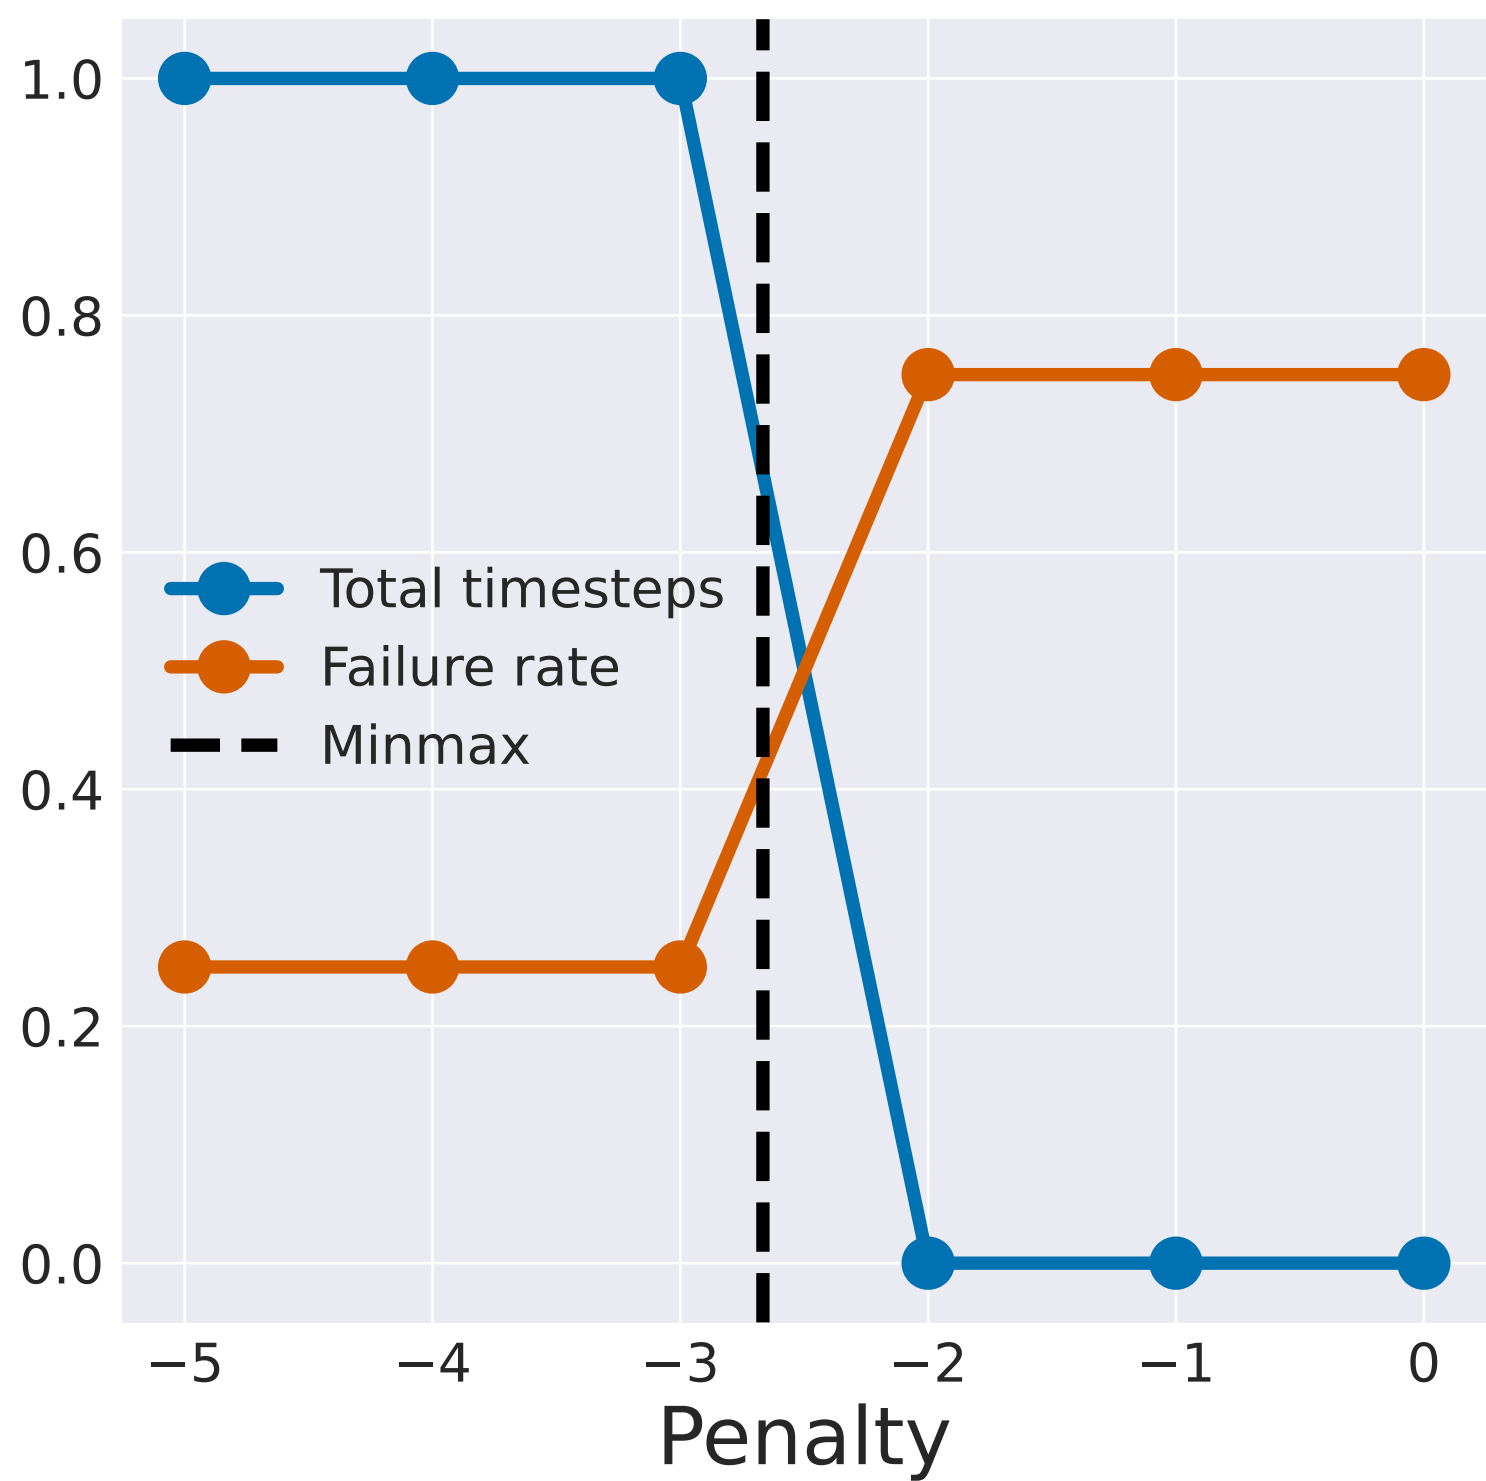

Supplement: supplementary_material [file attachment]

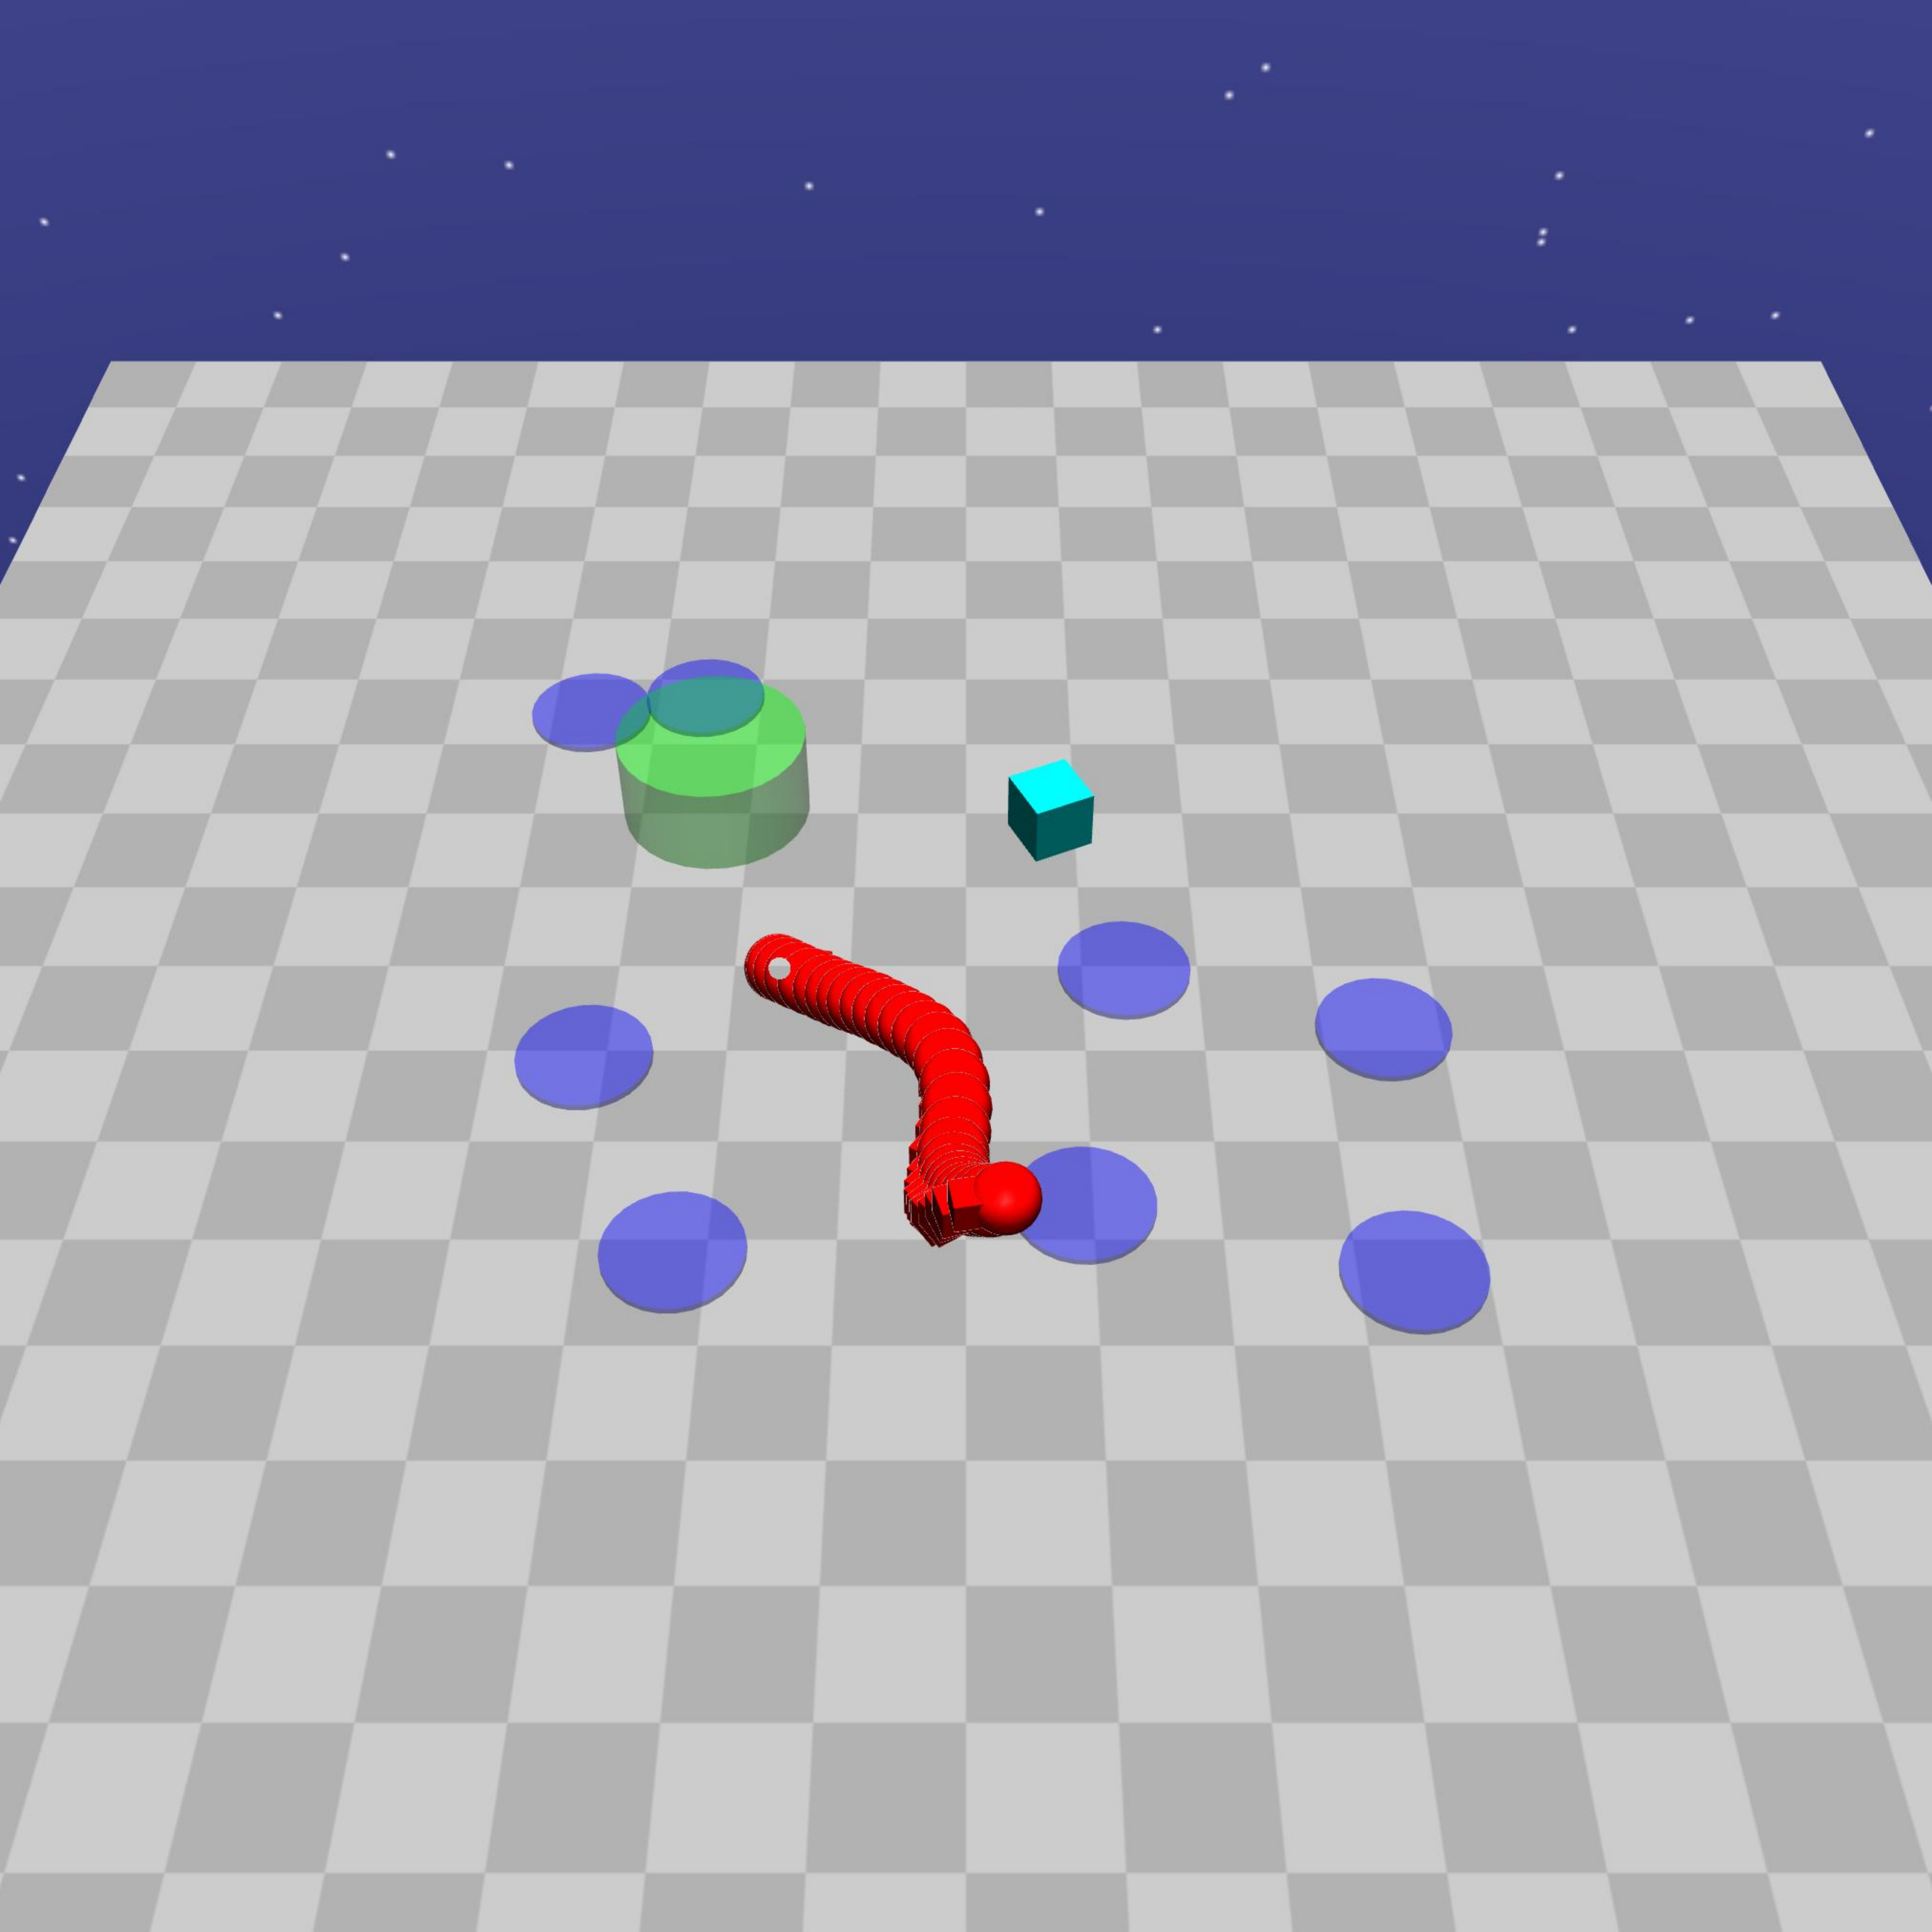

Supplement: supplementary_material [file attachment]

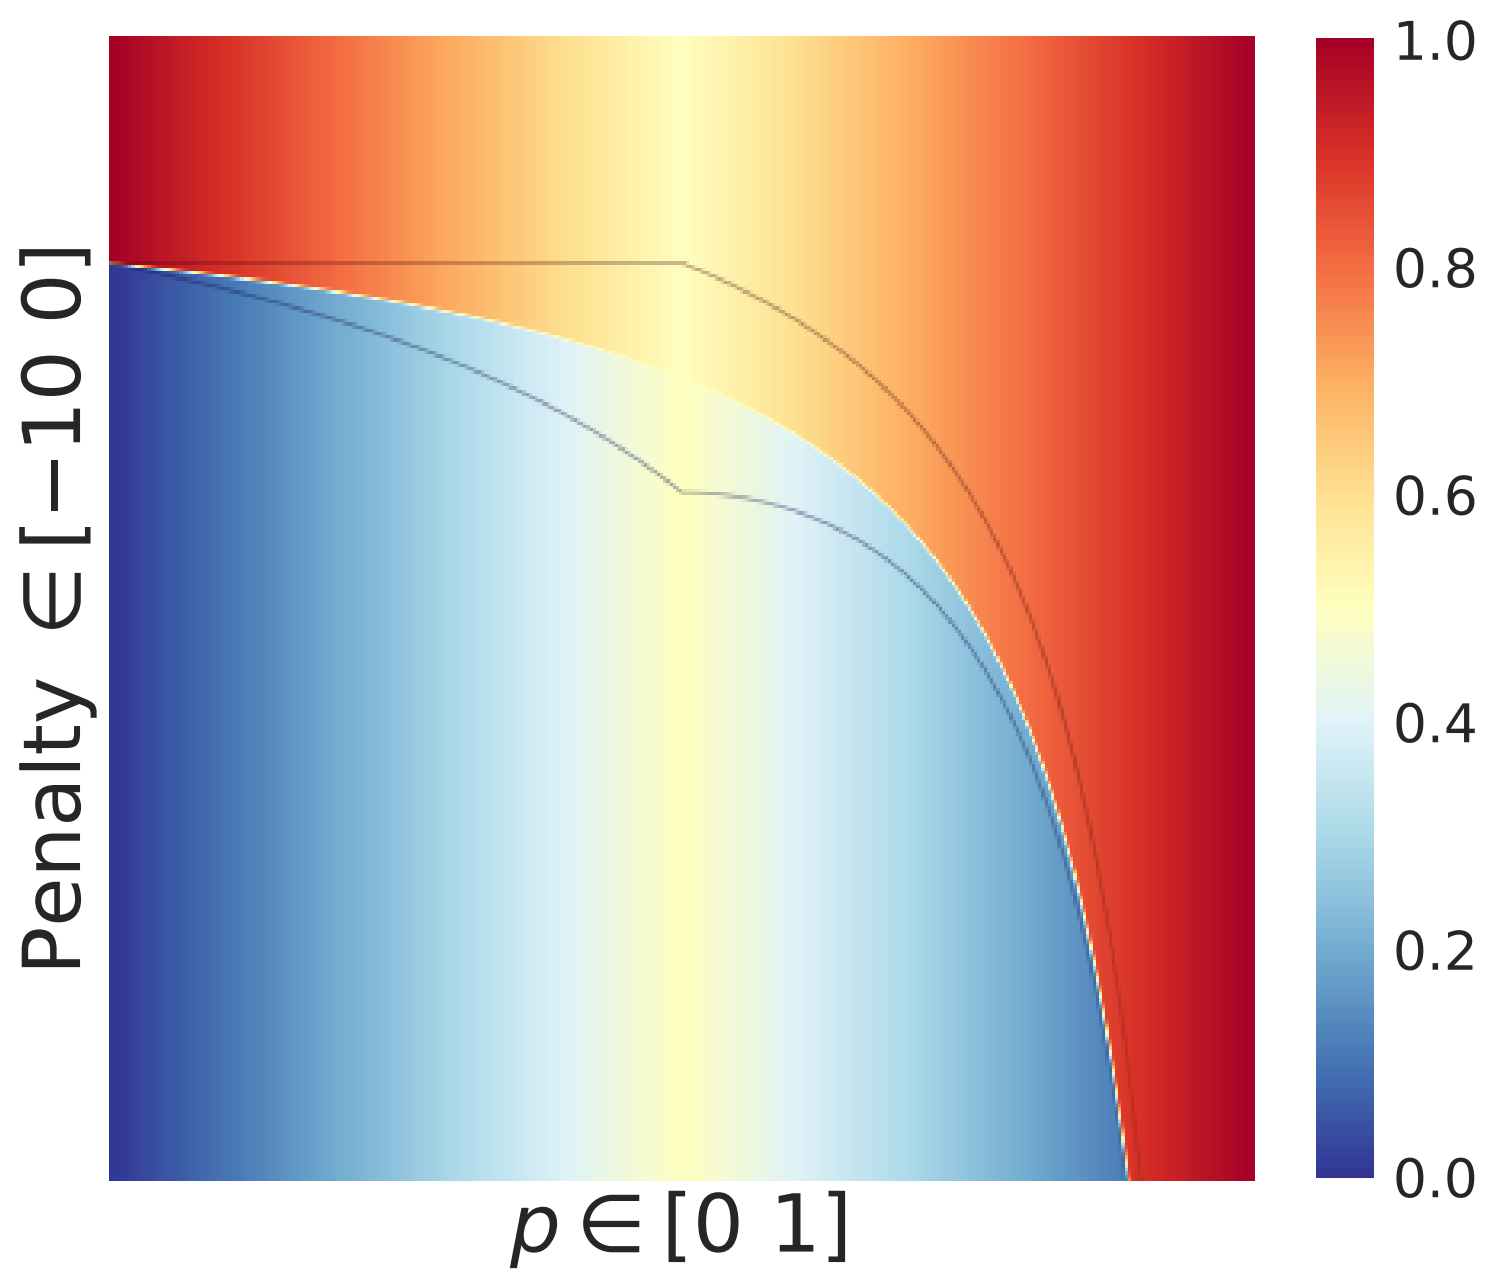

Supplement: supplementary_material [file attachment]

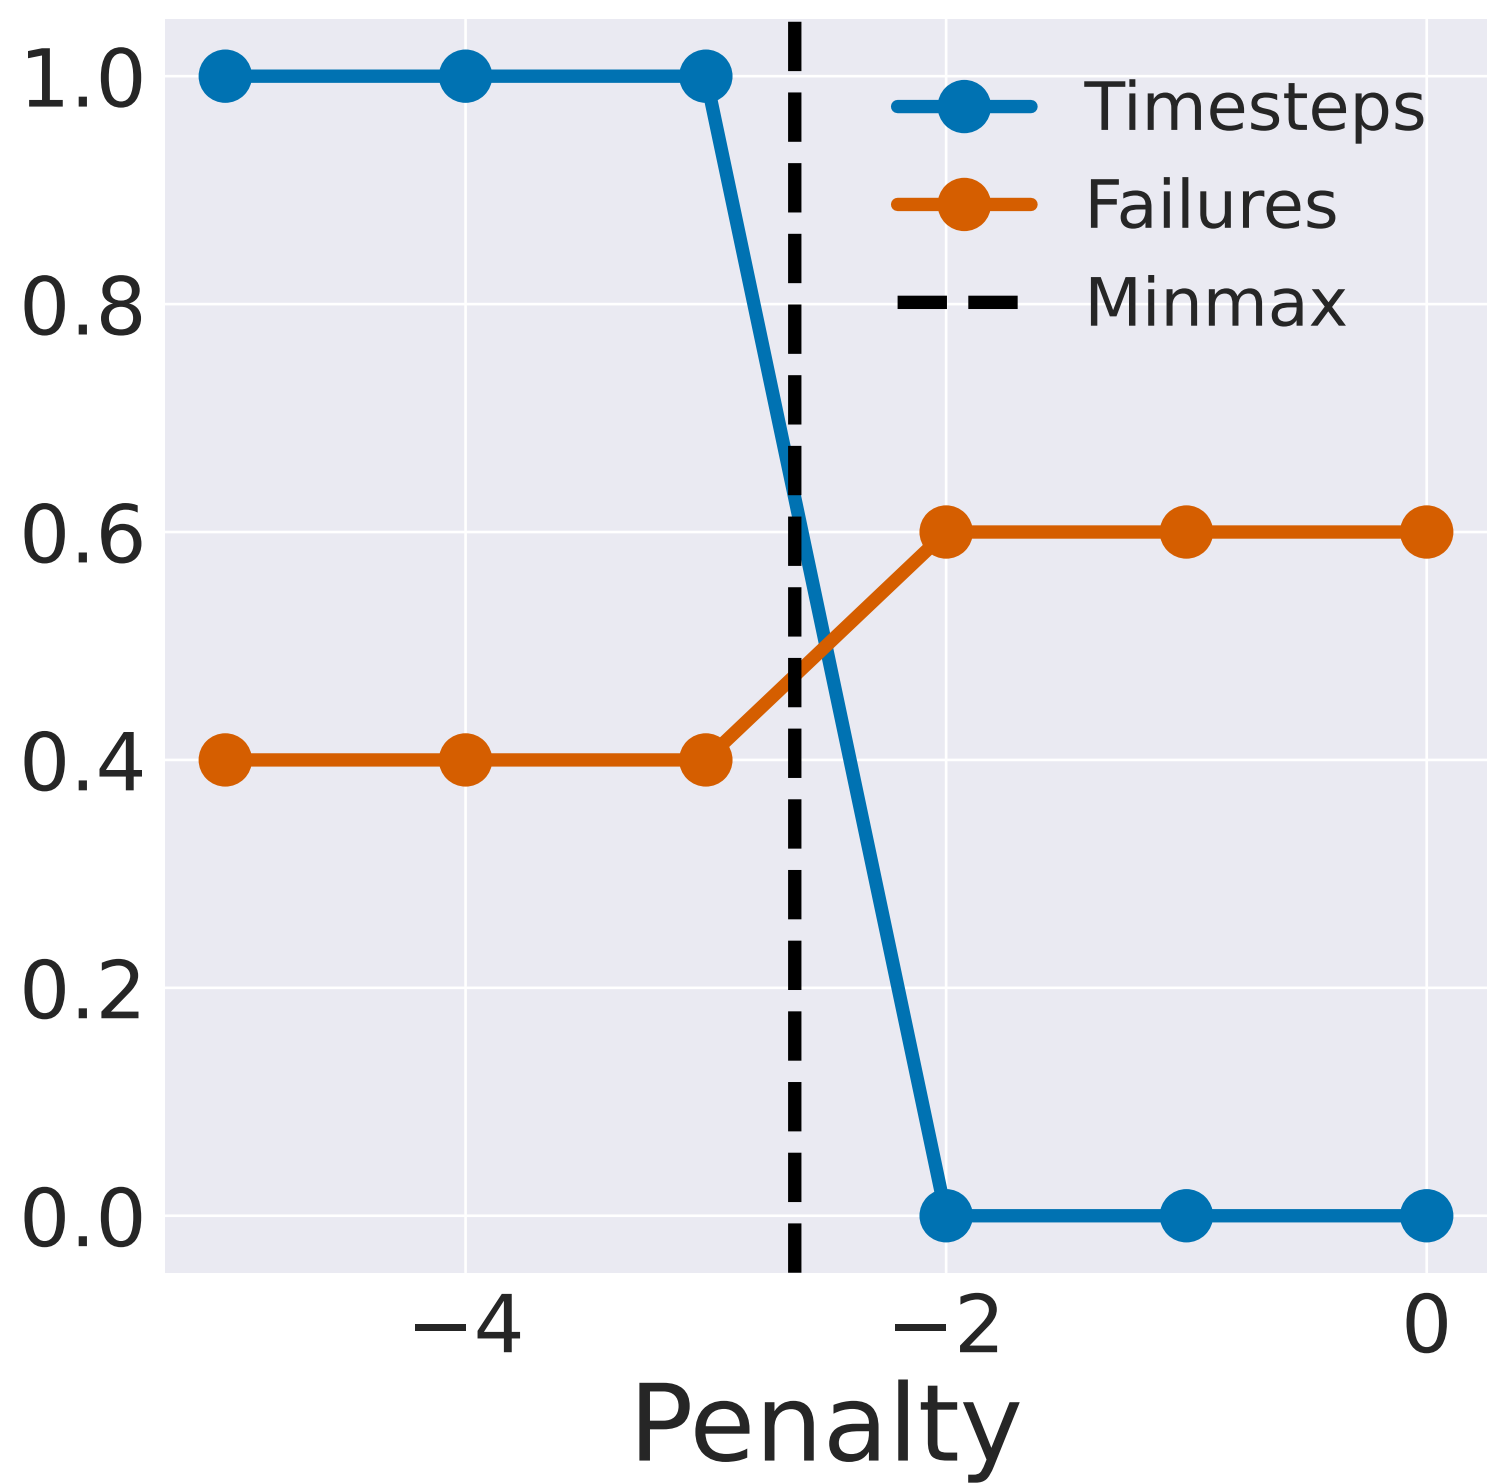

Supplement: supplementary_material [file attachment]

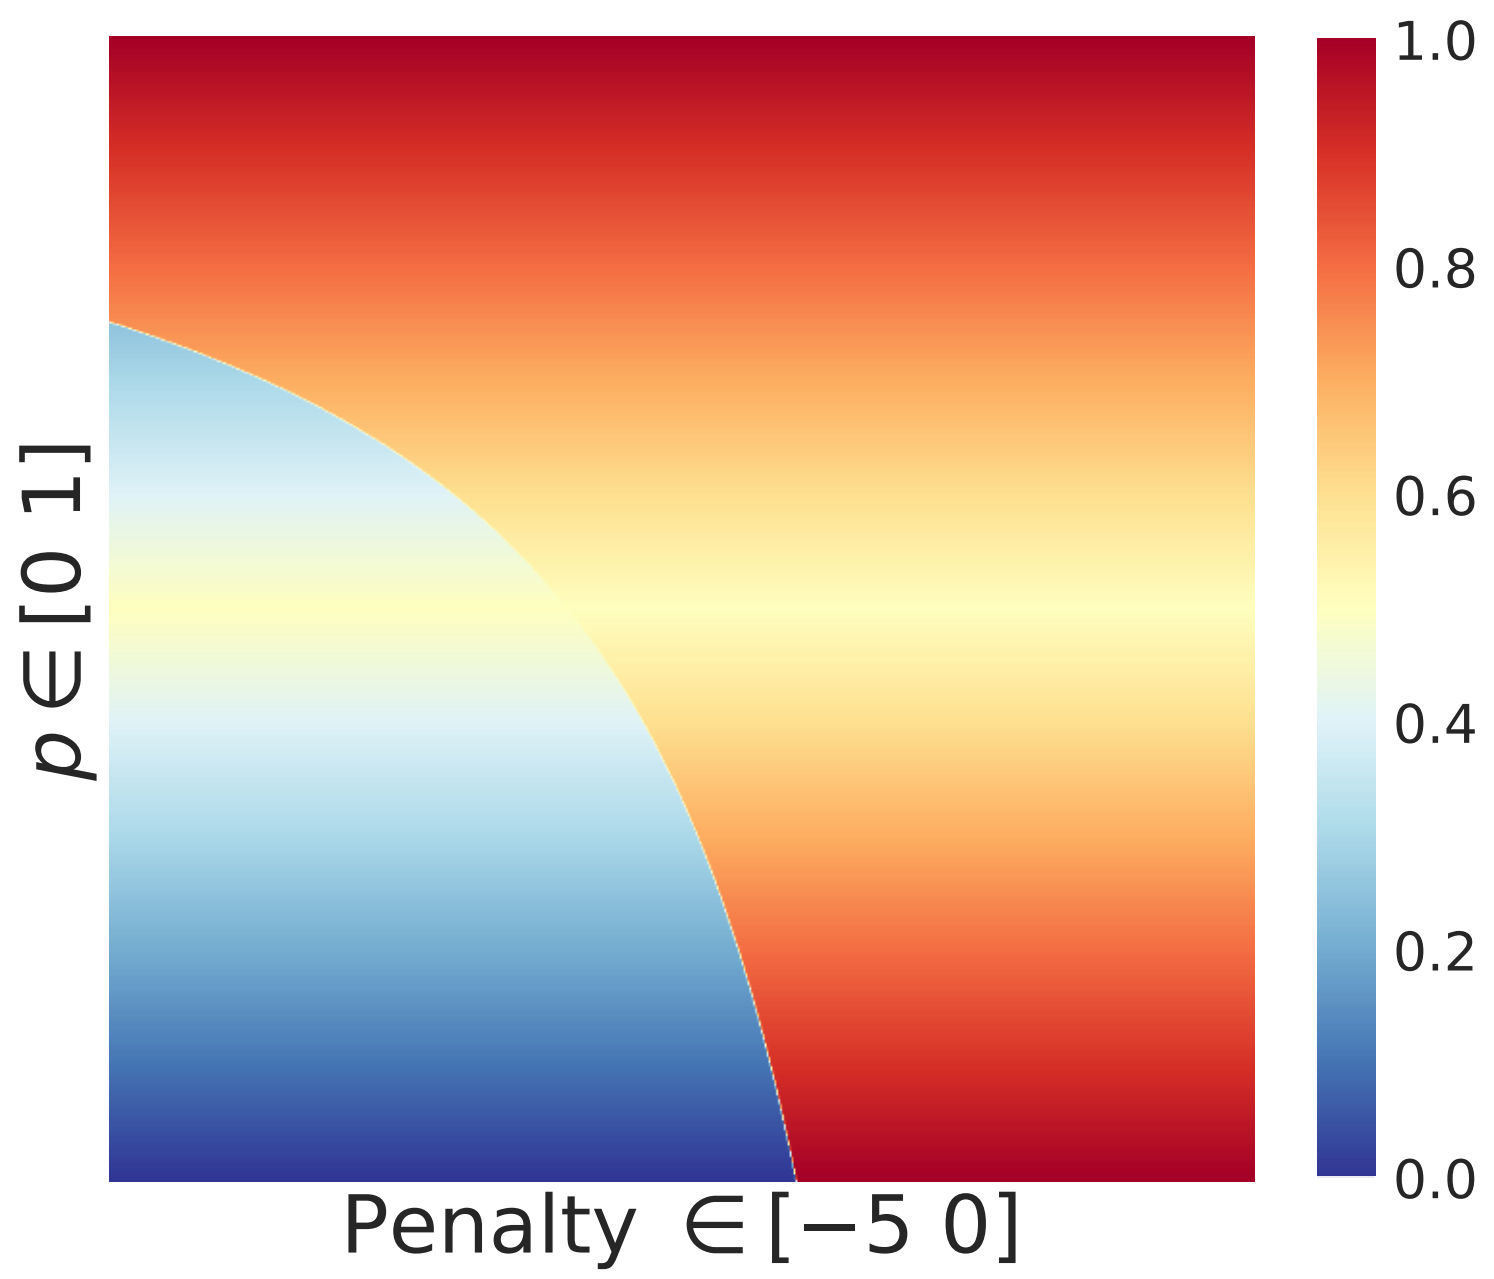

Supplement: supplementary_material [file attachment]

Penalty  $\in [-10\ 0]$

$R_{step} \in [-1\ 0]$

14

12

10

8

6

4

2

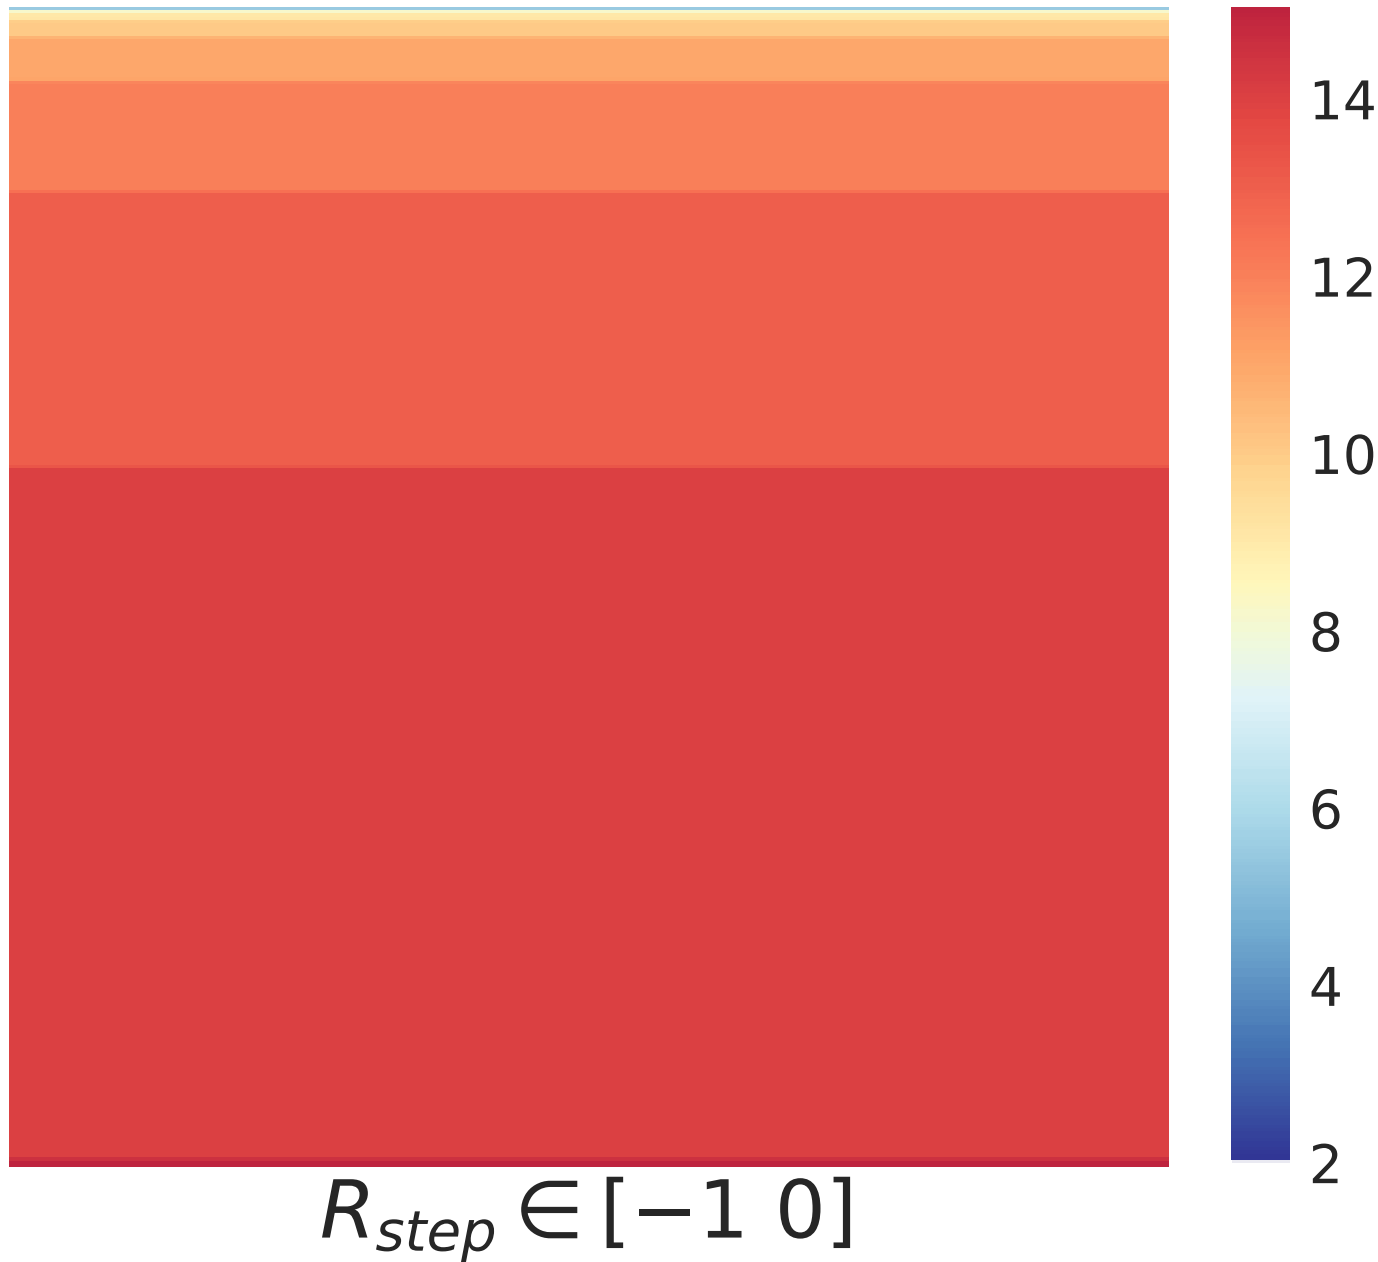

Supplement: supplementary_material [file attachment]

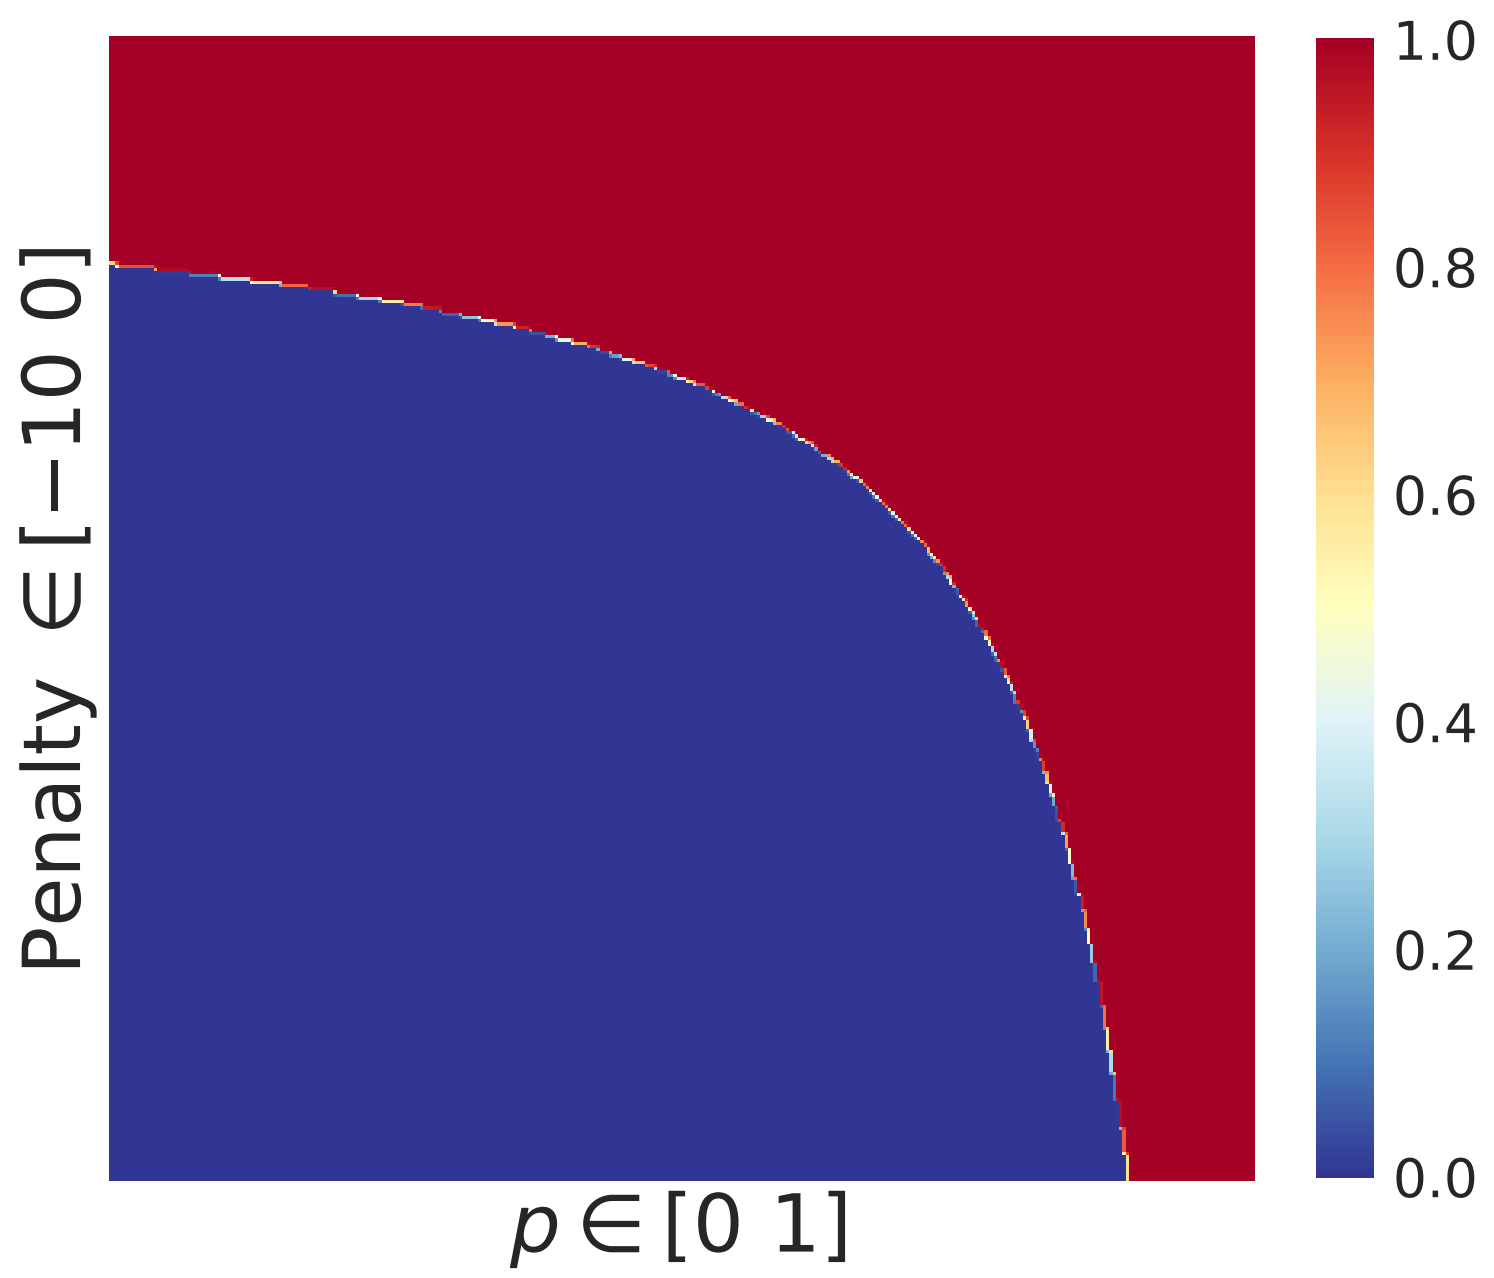

Supplement: supplementary_material [file attachment]

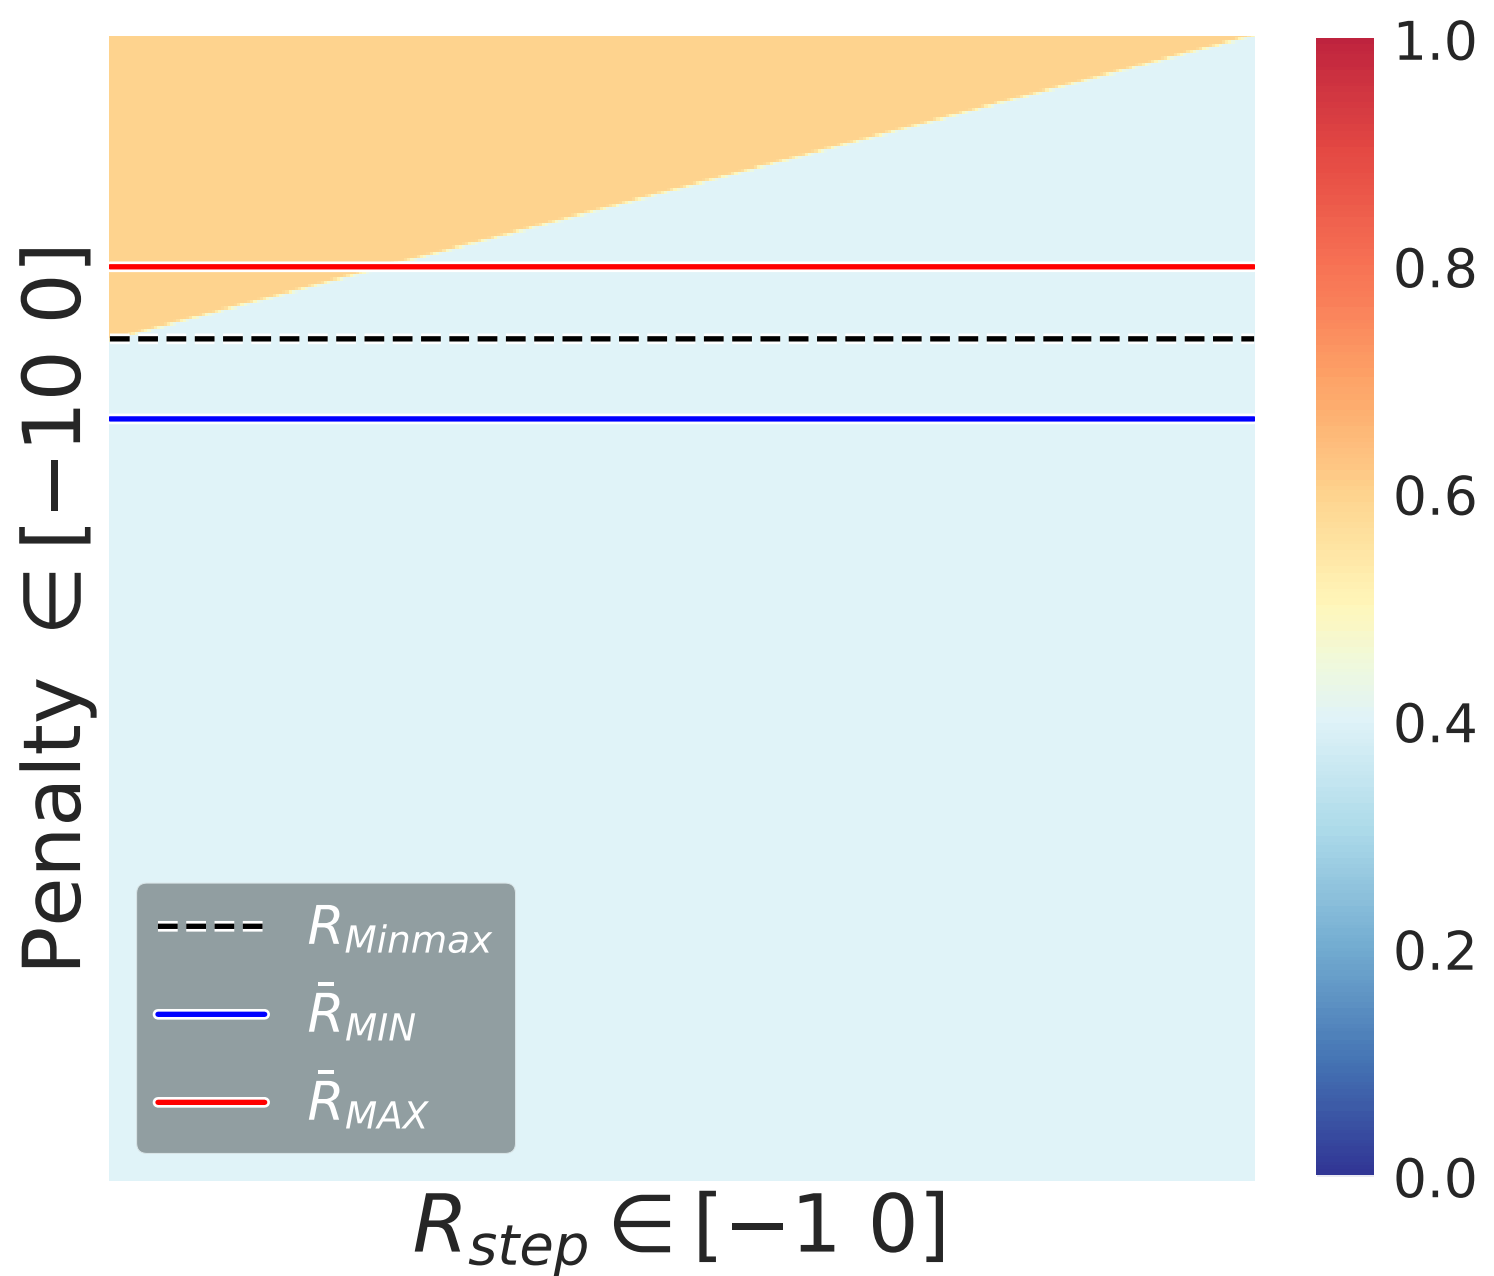

Supplement: supplementary_material [file attachment]

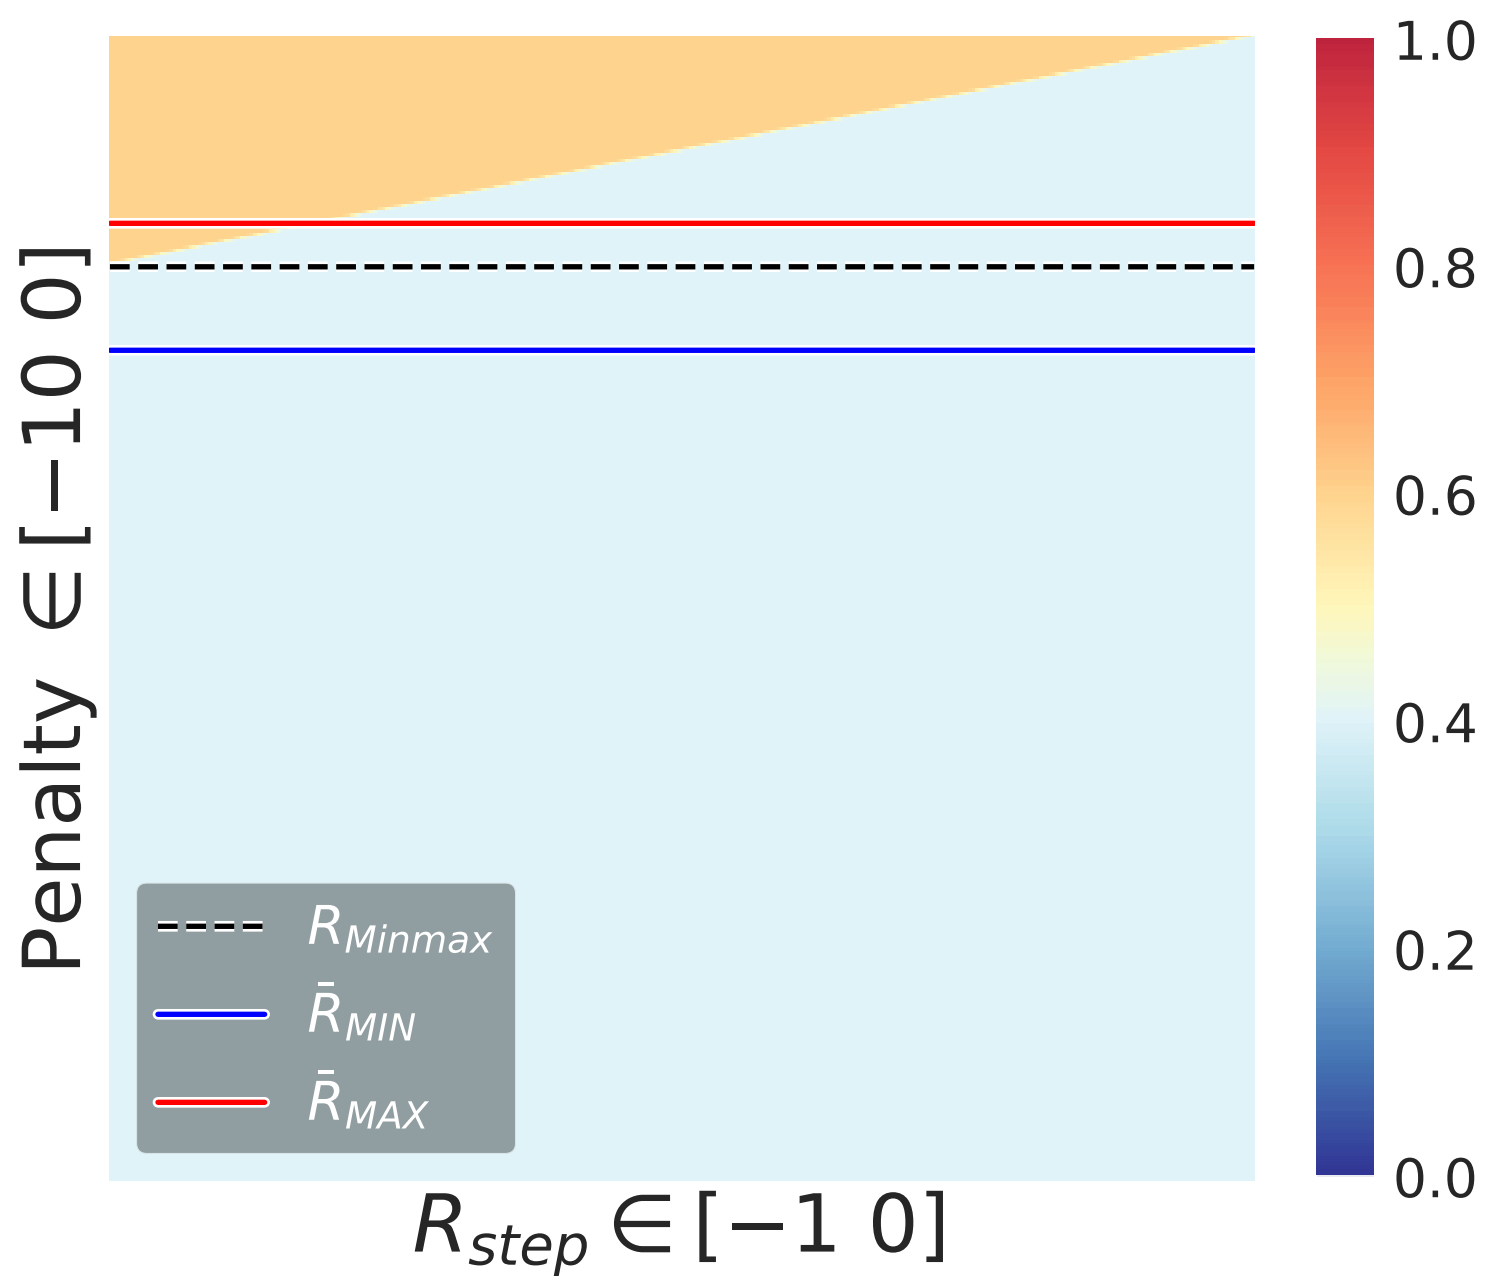

Supplement: supplementary_material [file attachment]

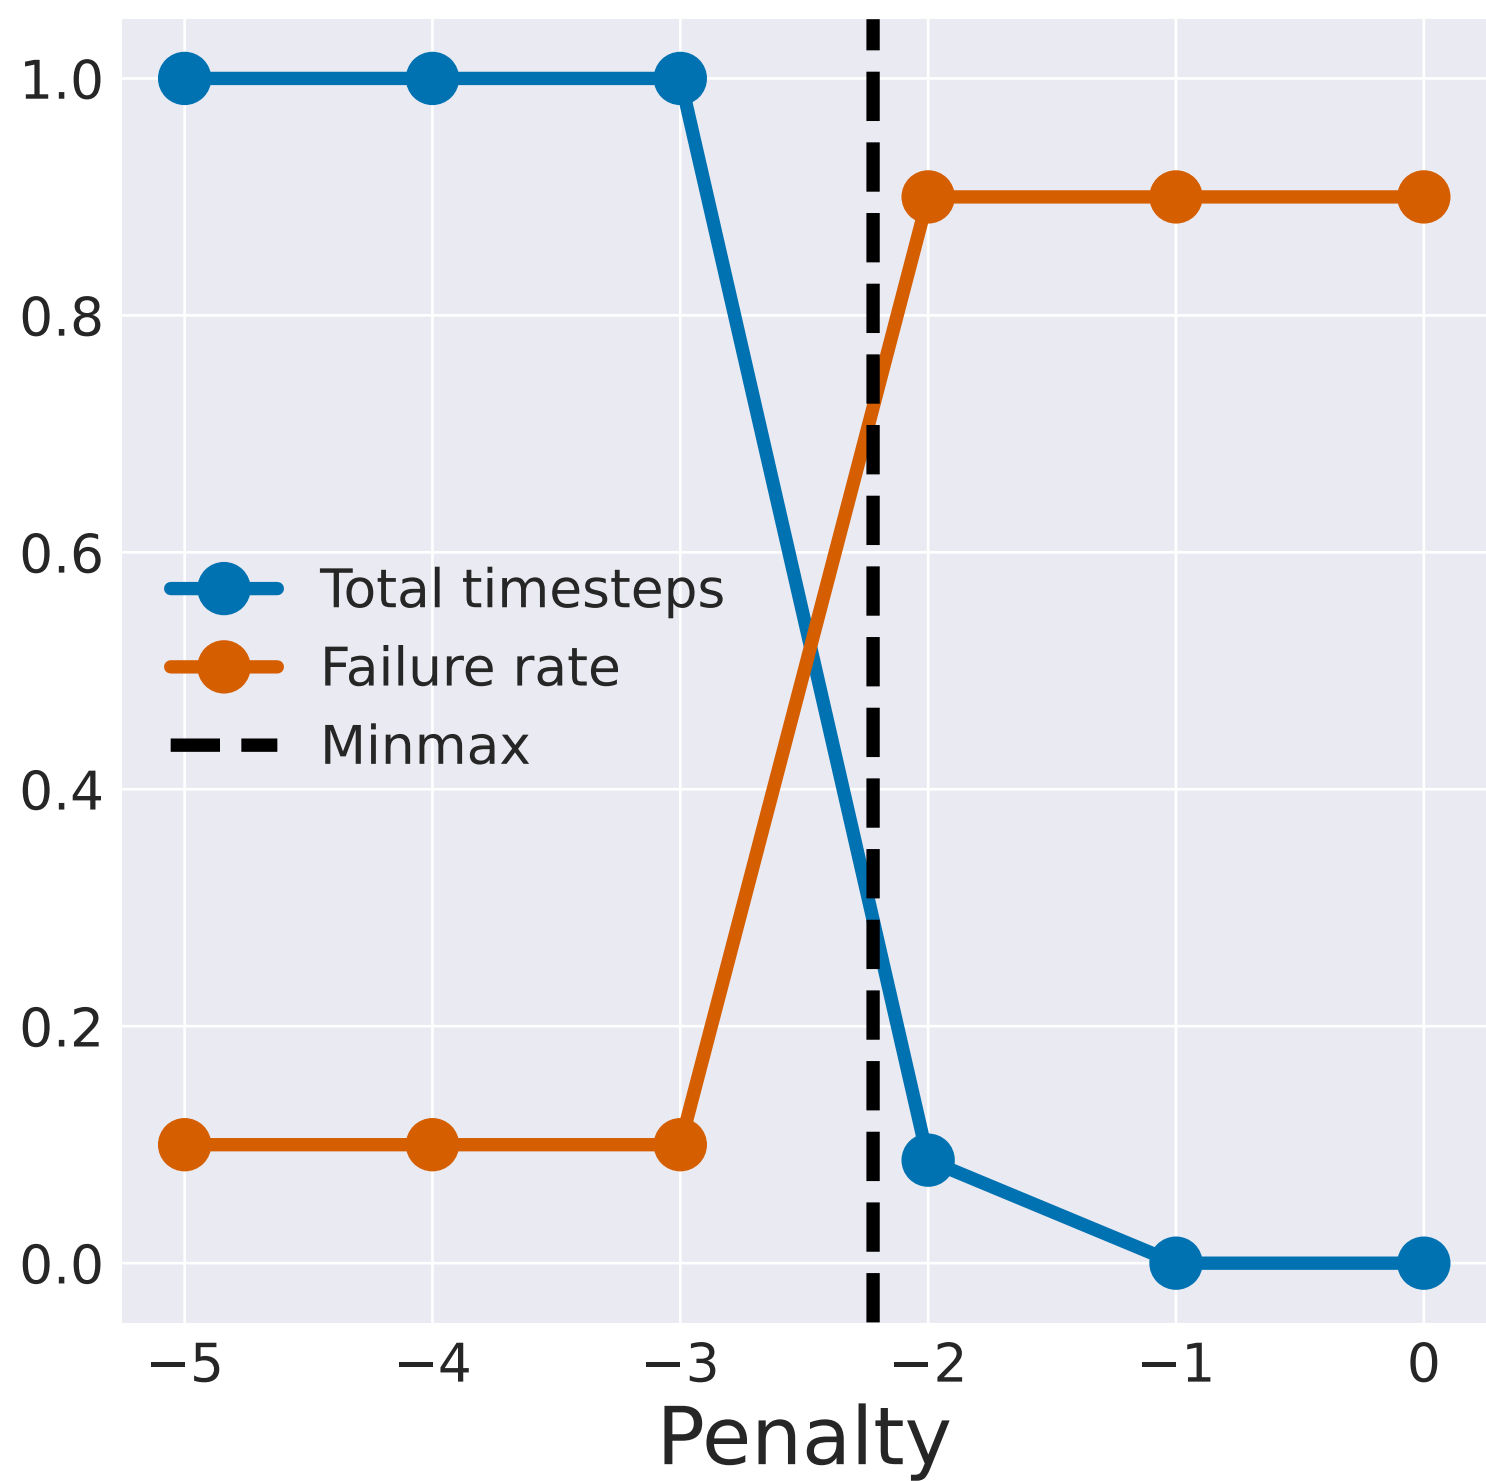

Supplement: supplementary_material [file attachment]

Penalty  $\in [-50\ 0]$

$p \in [0\ 1]$

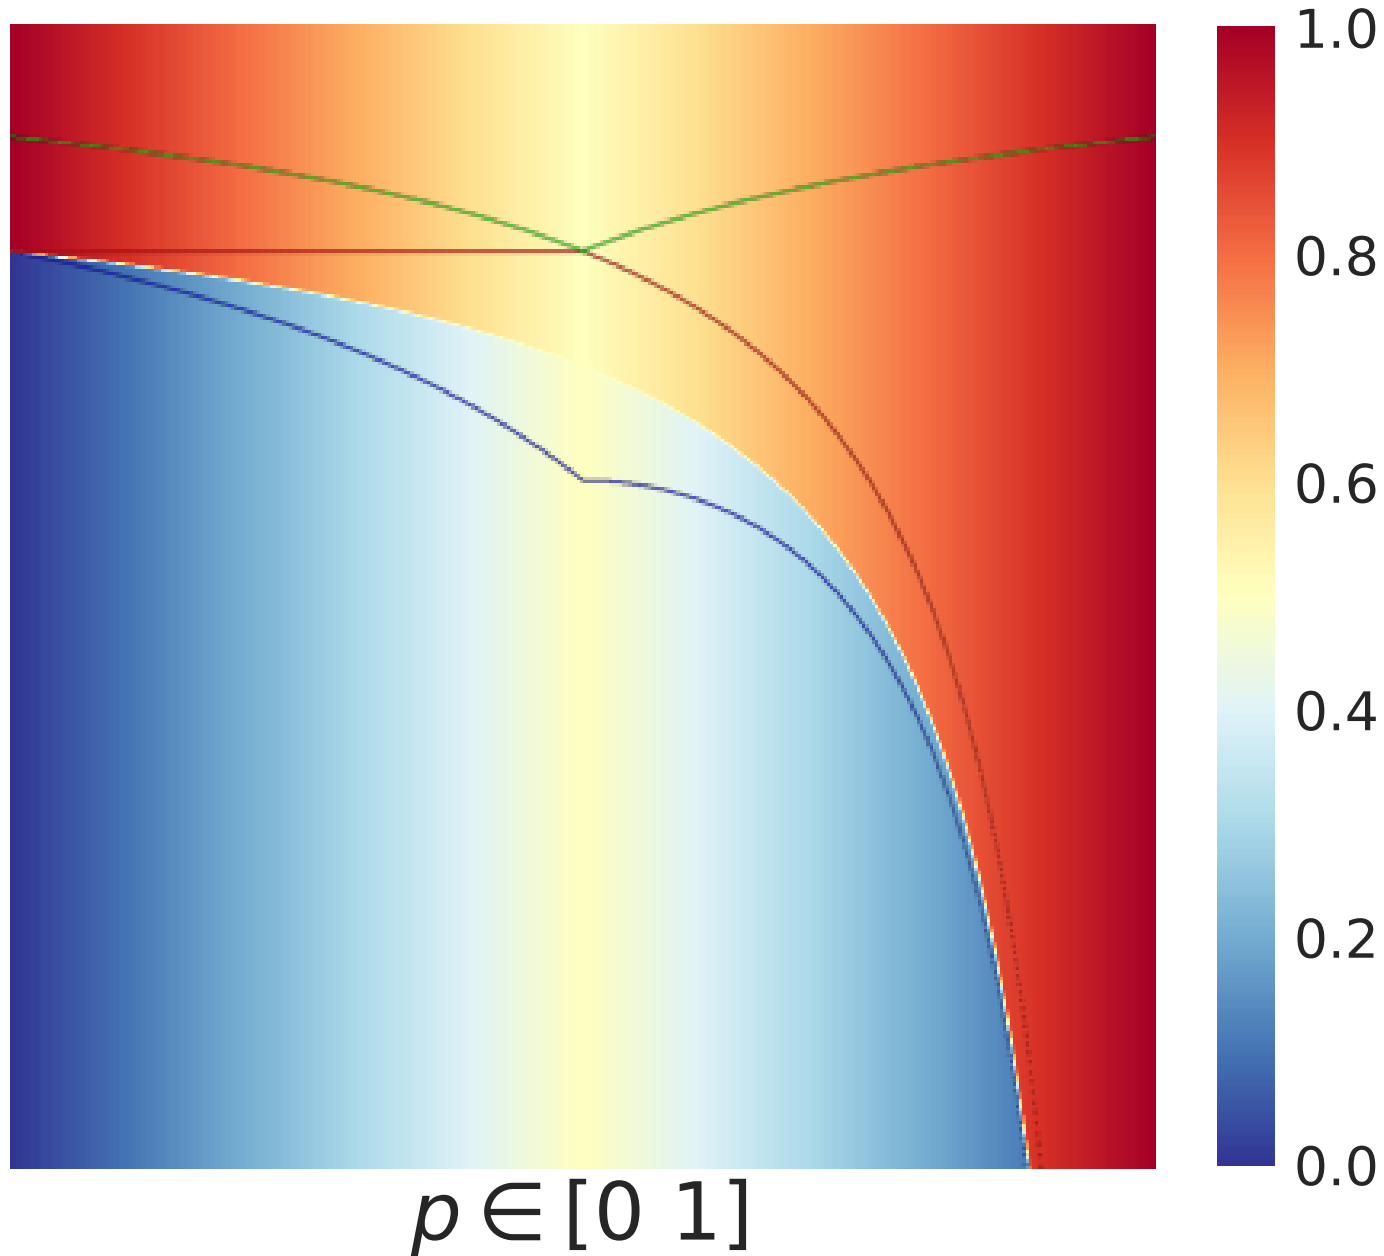

Supplement: supplementary_material [file attachment]

Penalty  $\in [-10\ 0]$

$p \in [0\ 1]$

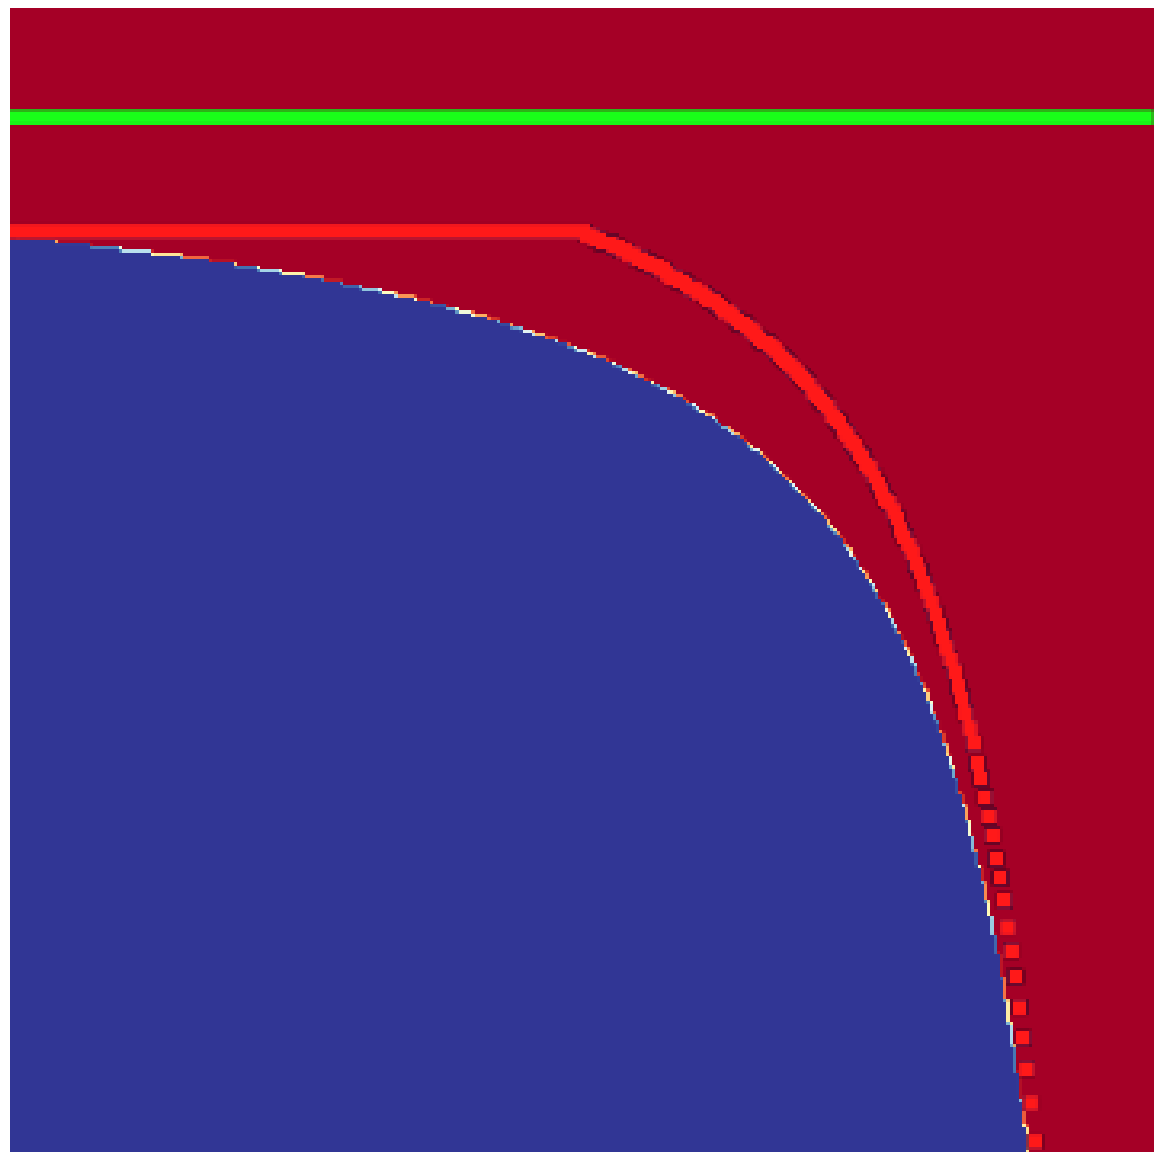

1.0

0.8

0.6

0.4

0.2

0.0

Supplement: supplementary_material [file attachment]

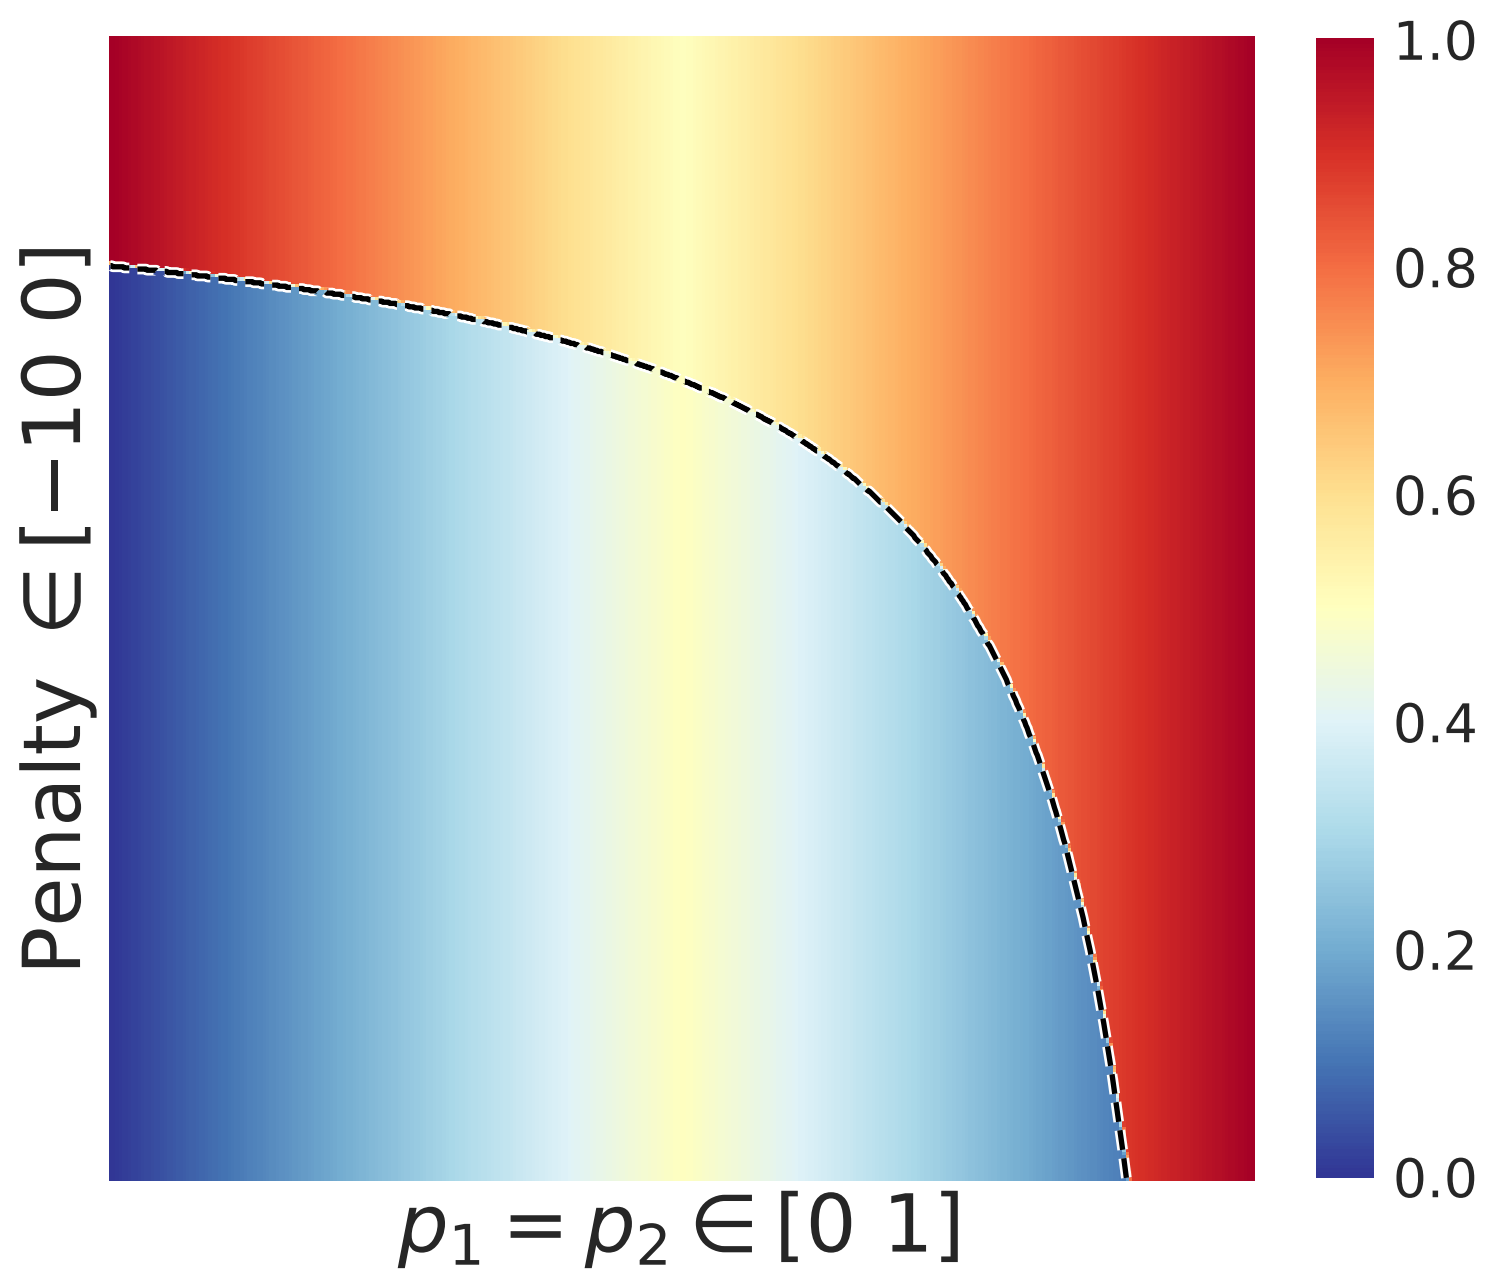

Supplement: supplementary_material [file attachment]

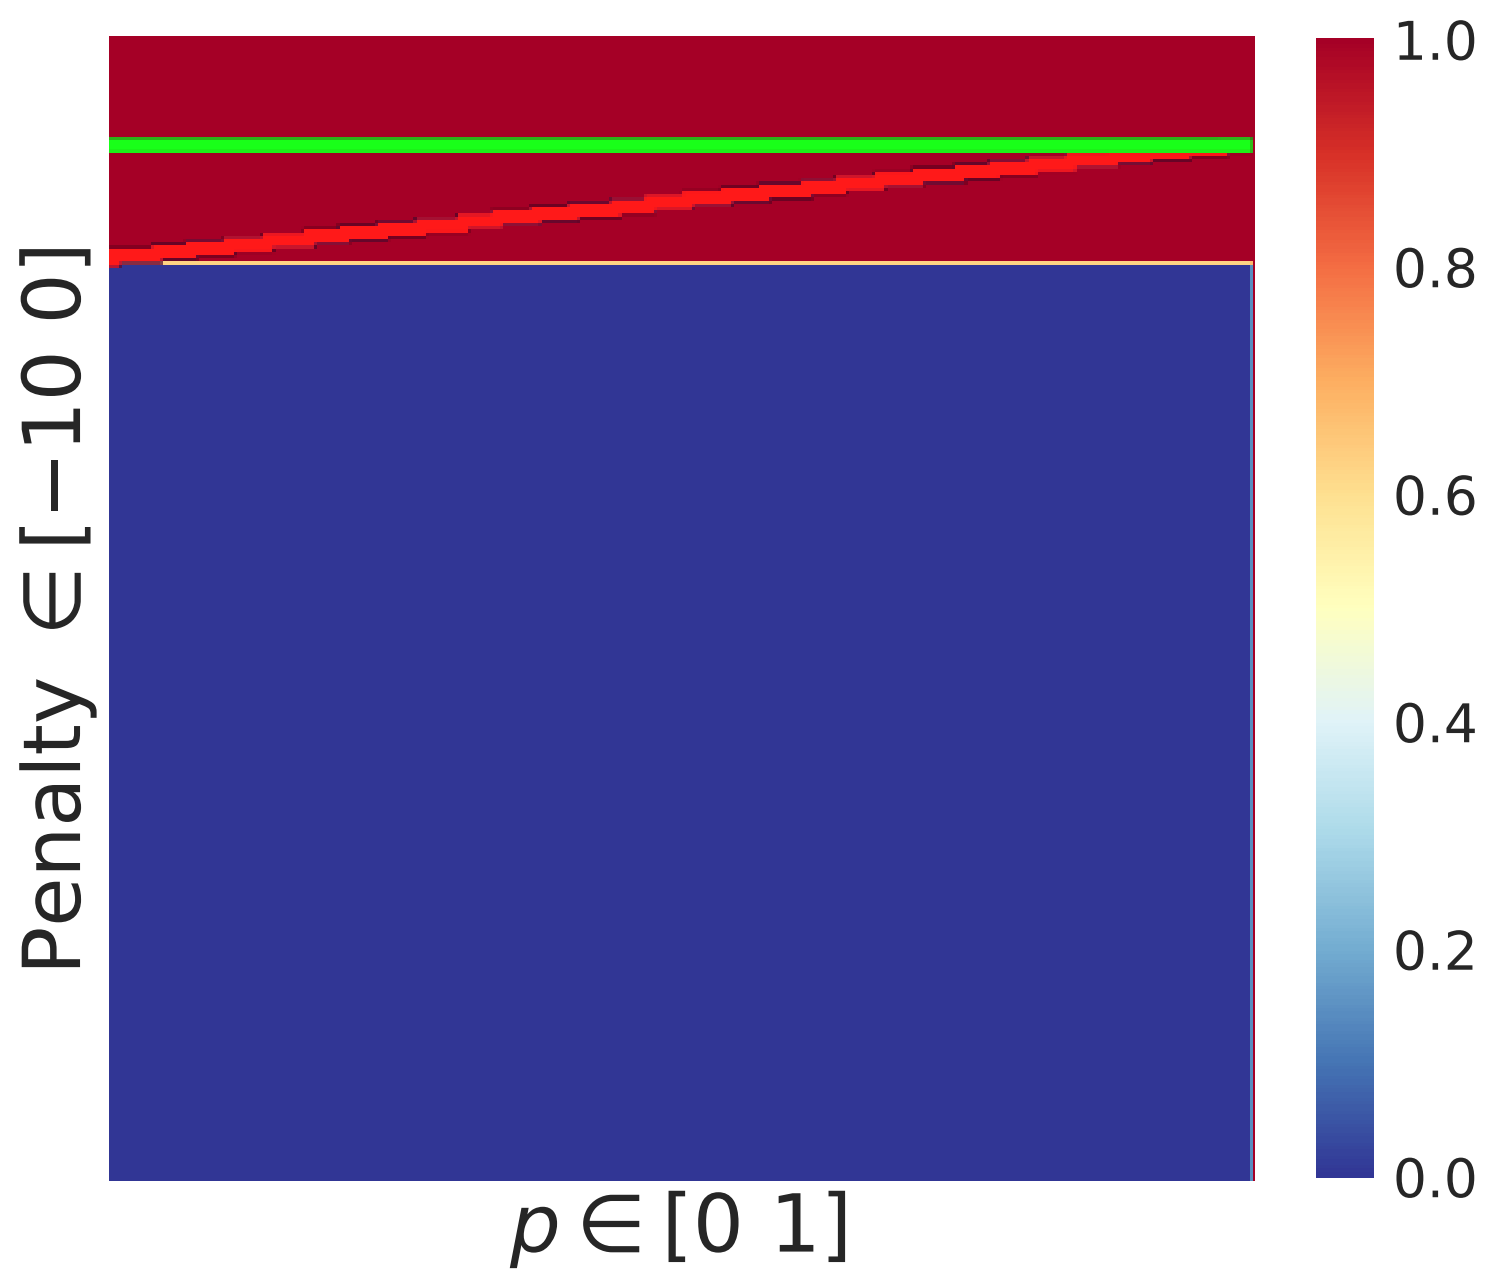

Supplement: supplementary_material [file attachment]

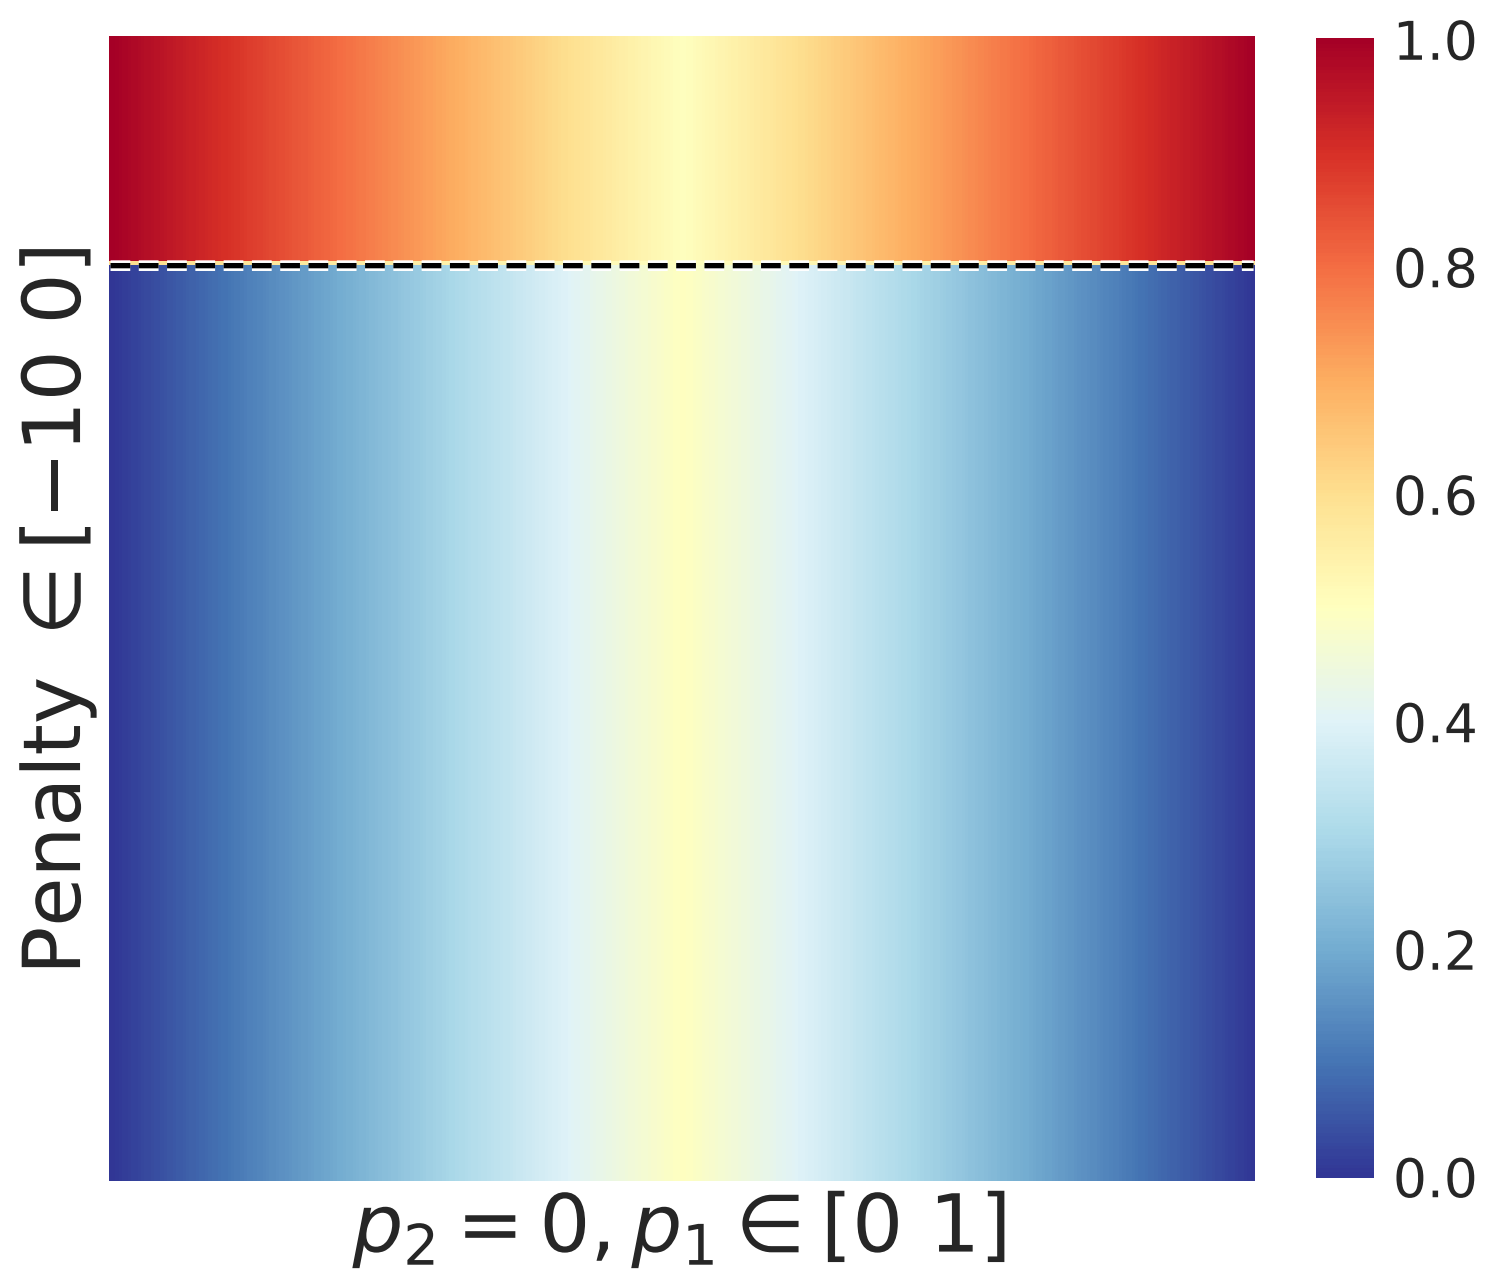

Supplement: supplementary_material [file attachment]

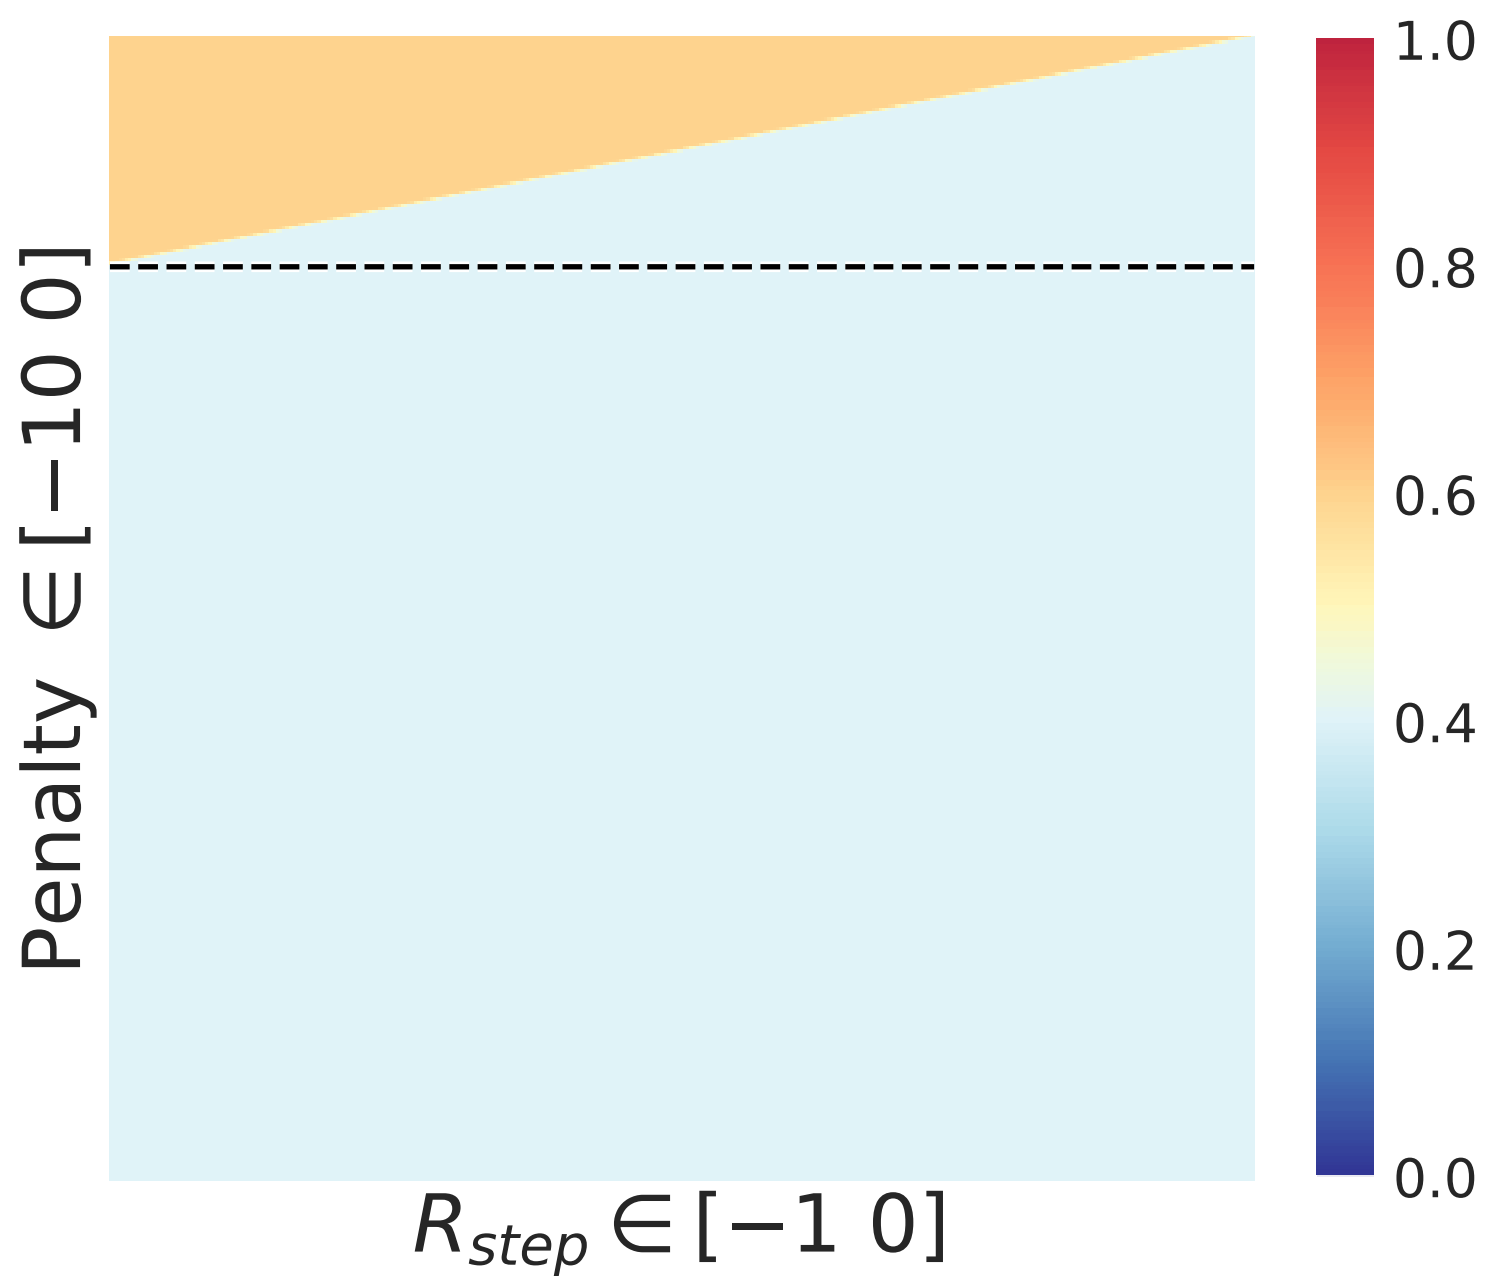

Supplement: supplementary_material [file attachment]

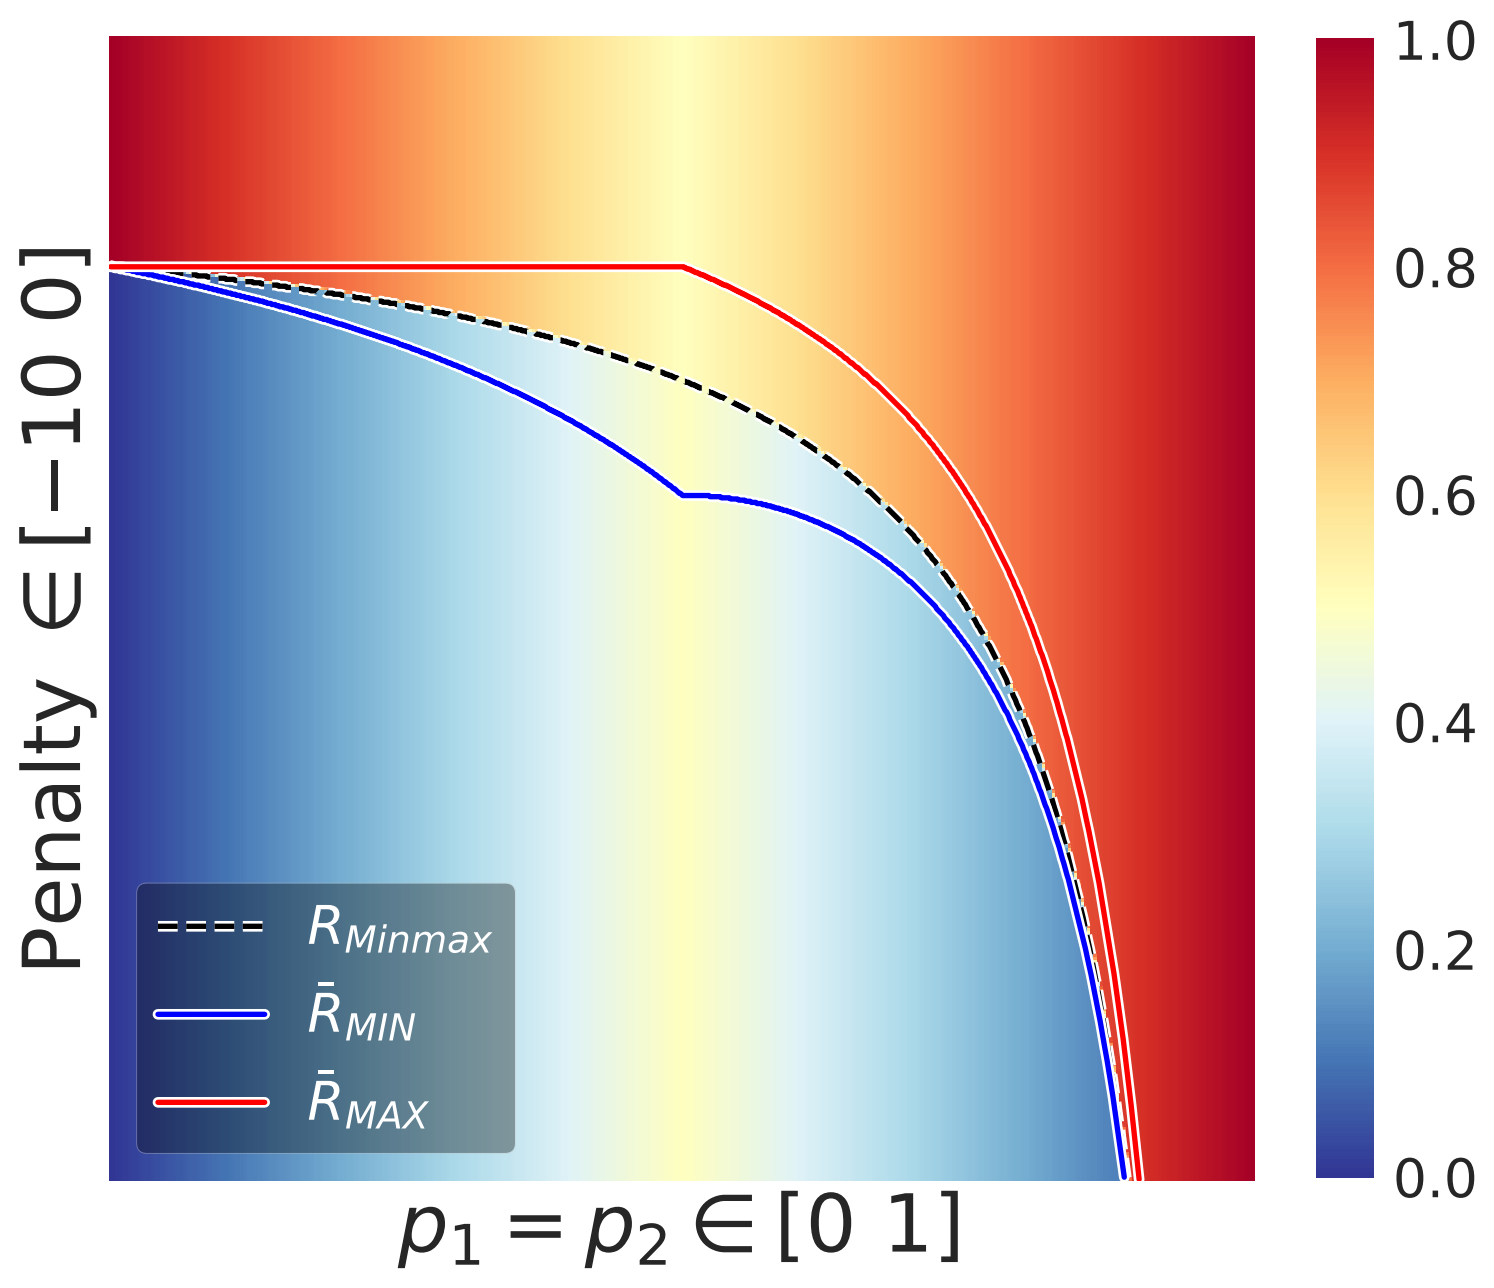

Supplement: supplementary_material [file attachment]

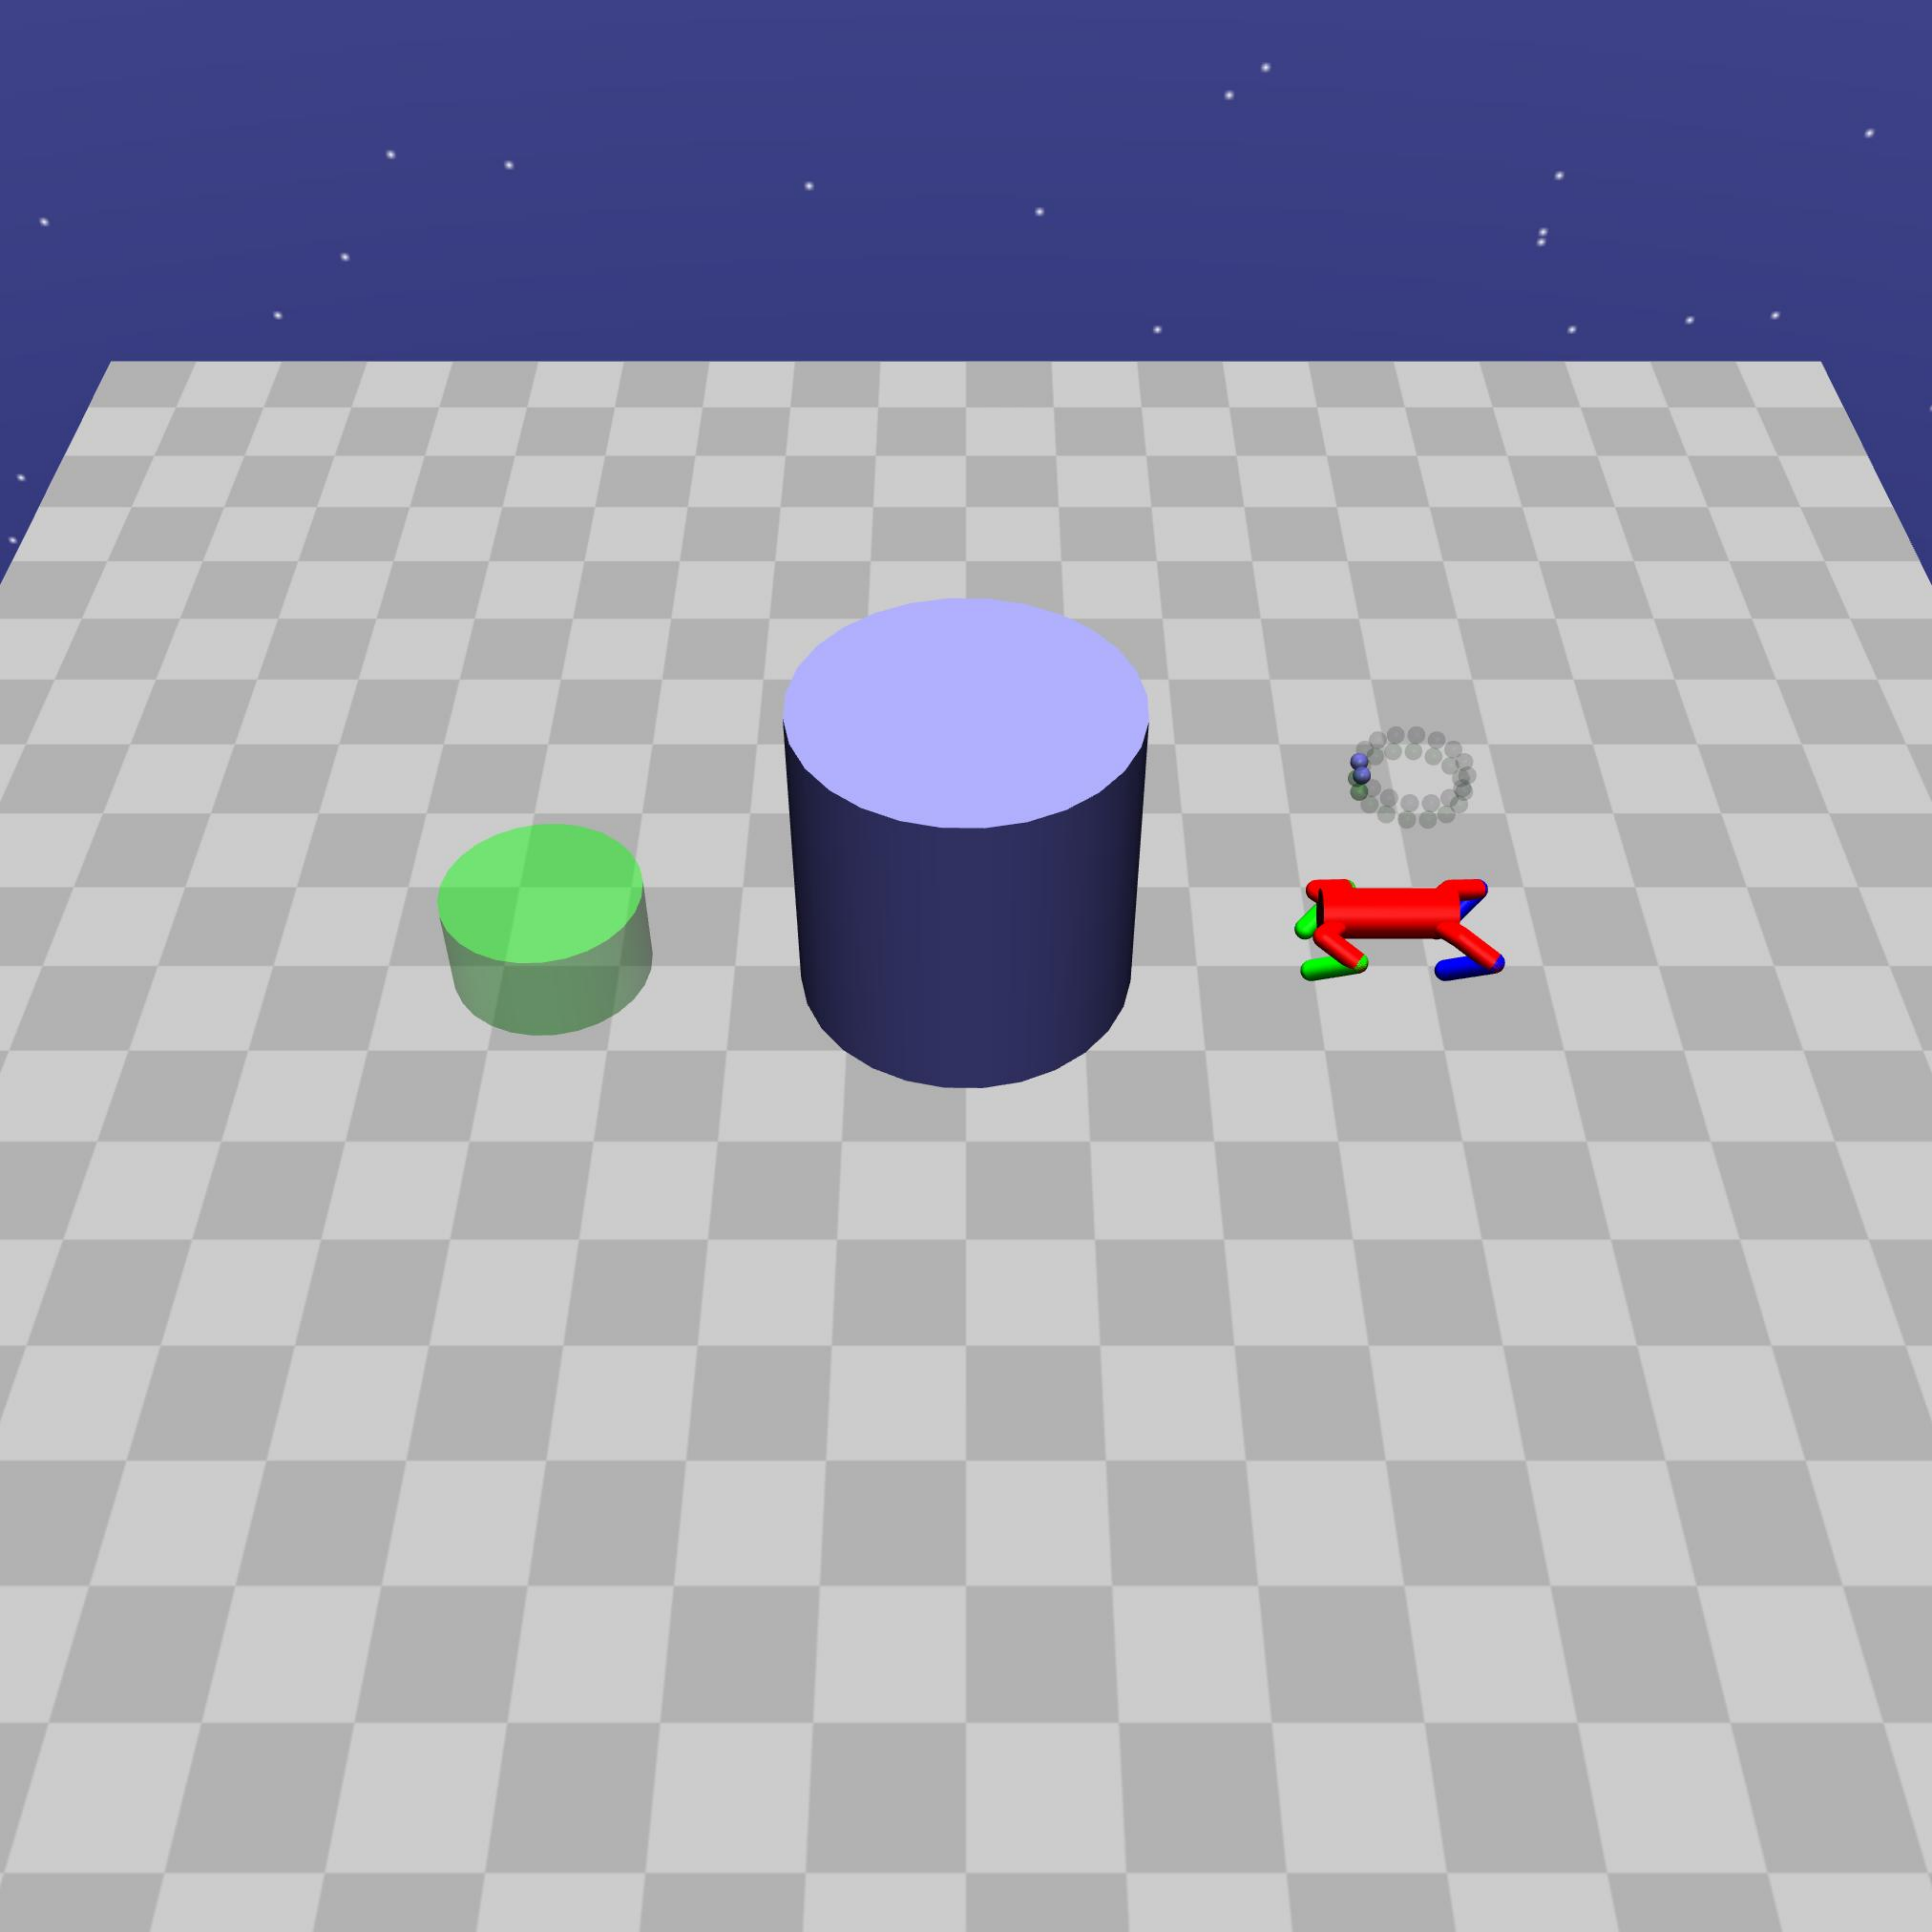

Supplement: supplementary_material [file attachment]

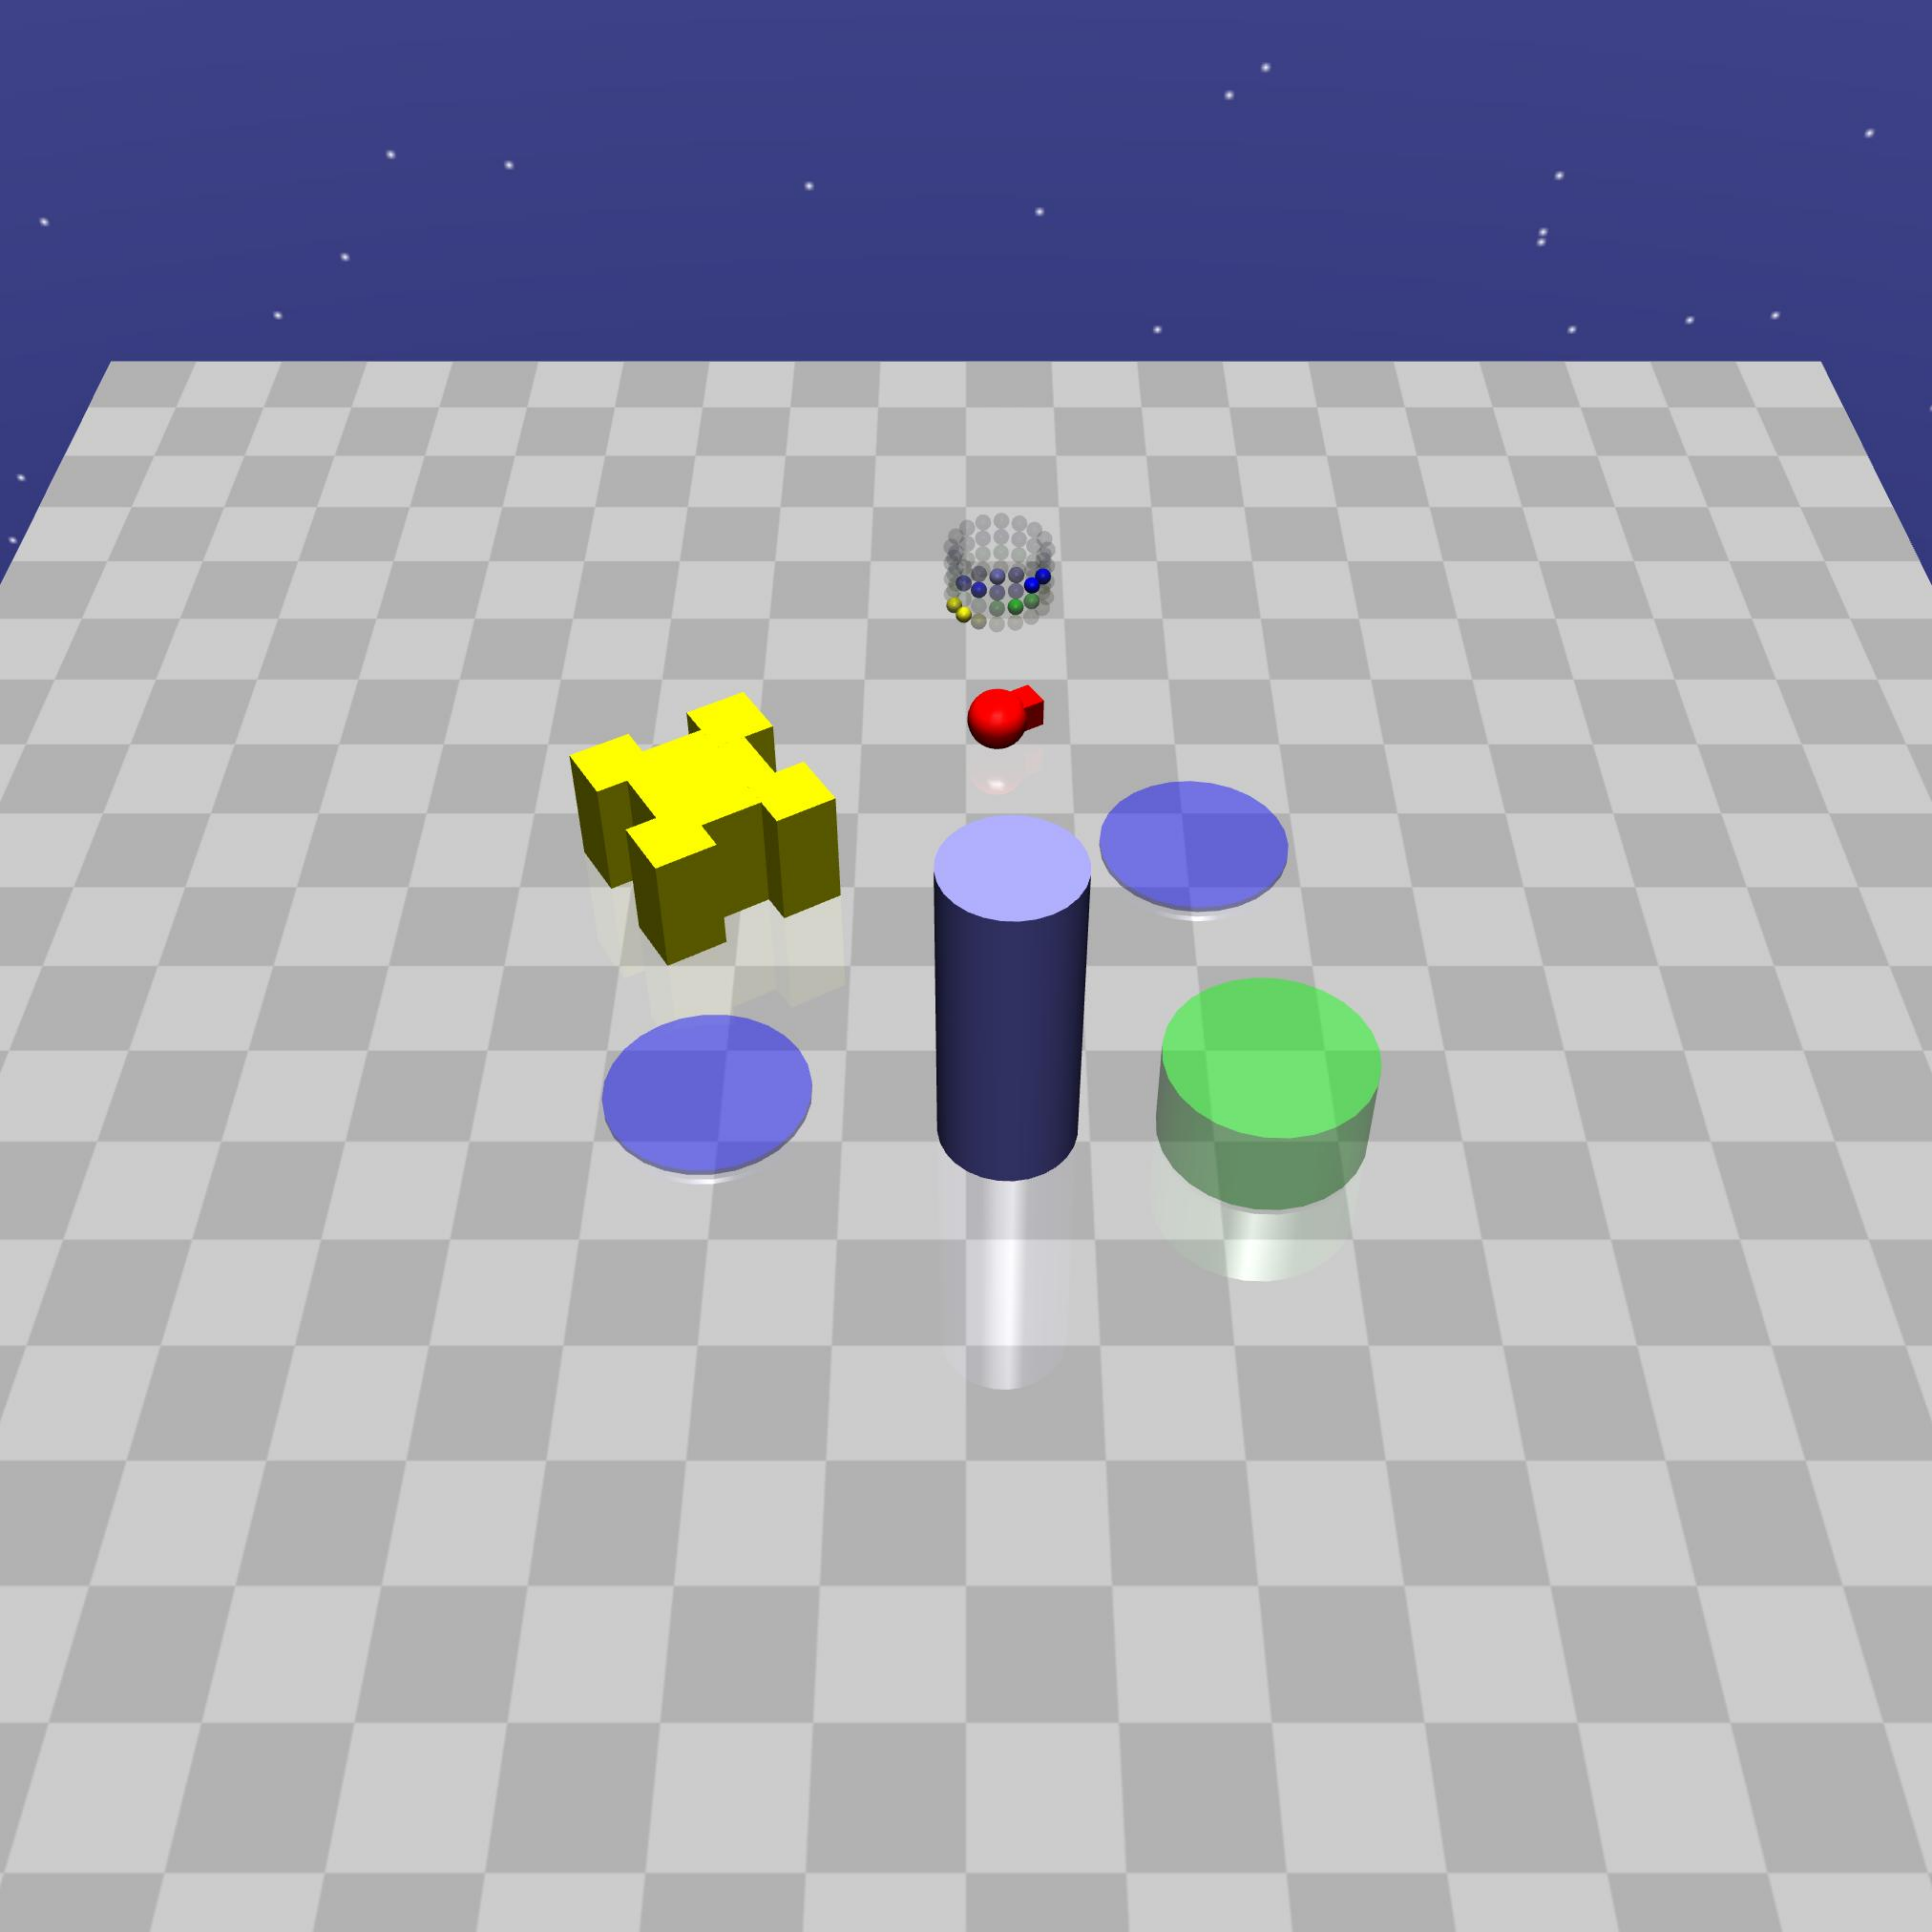

Supplement: supplementary_material [file attachment]

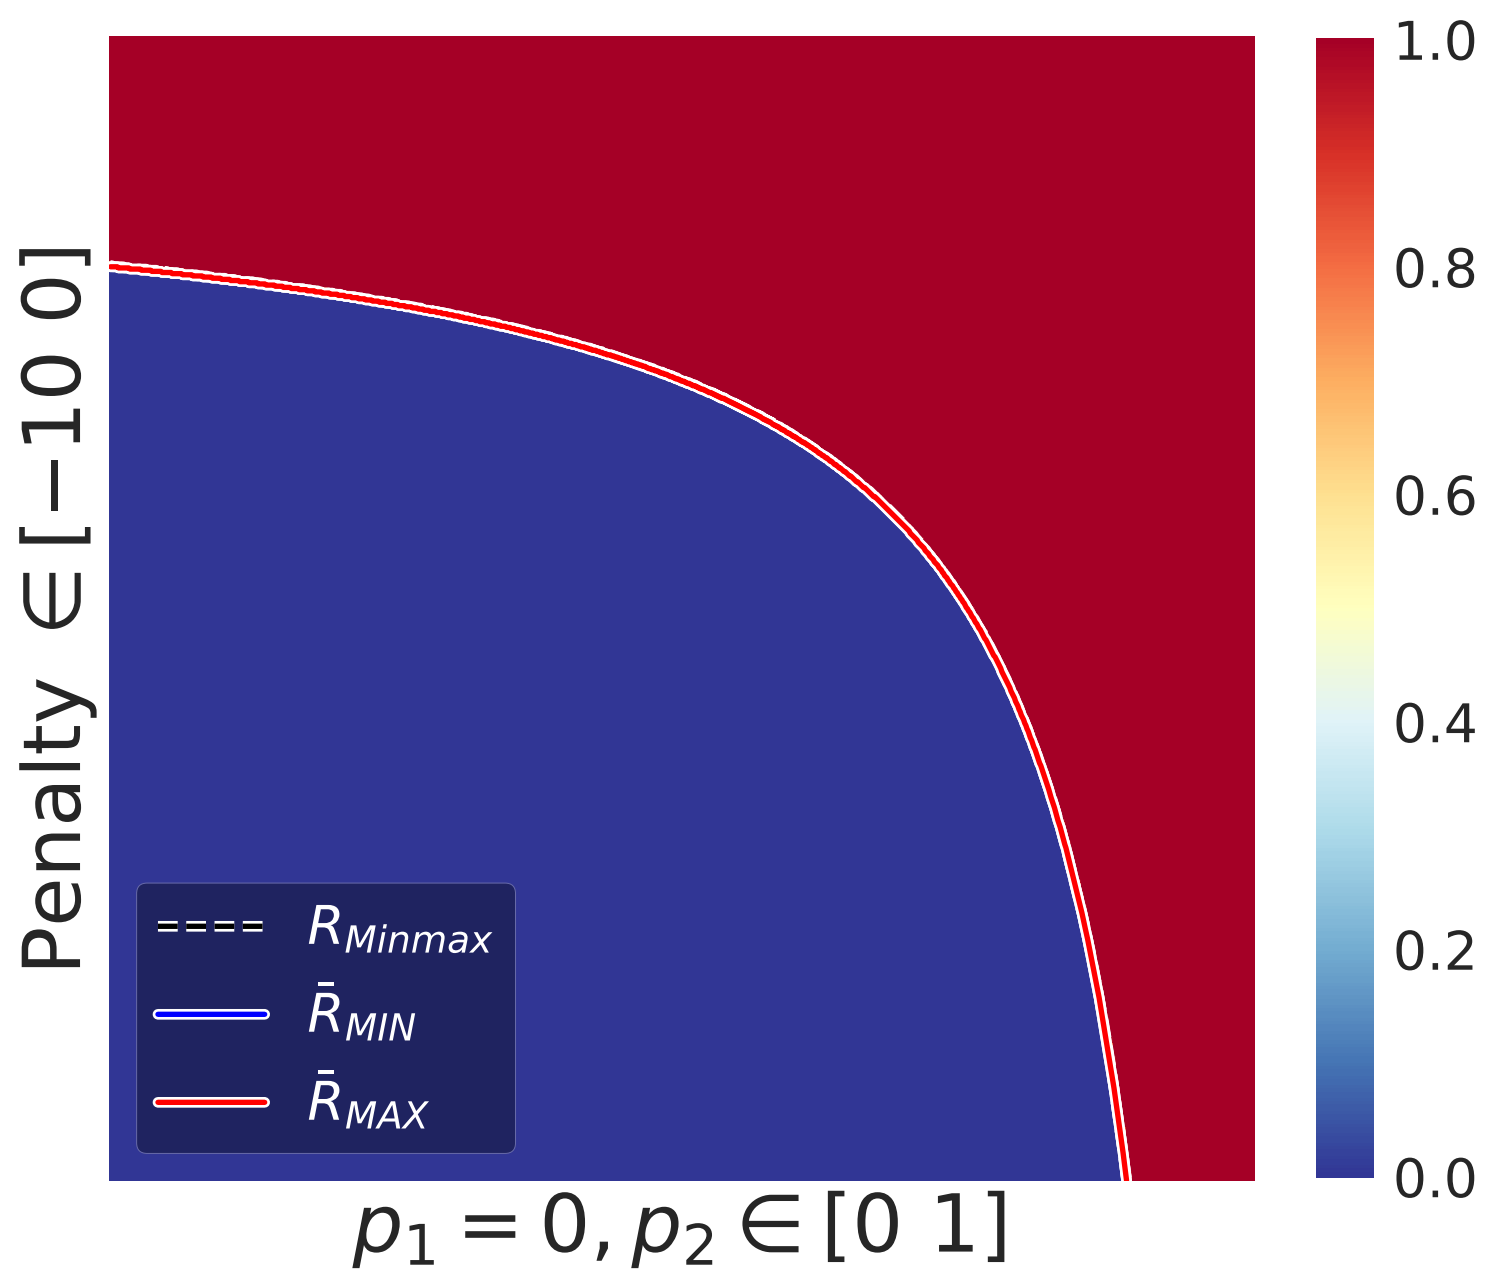

Supplement: supplementary_material [file attachment]

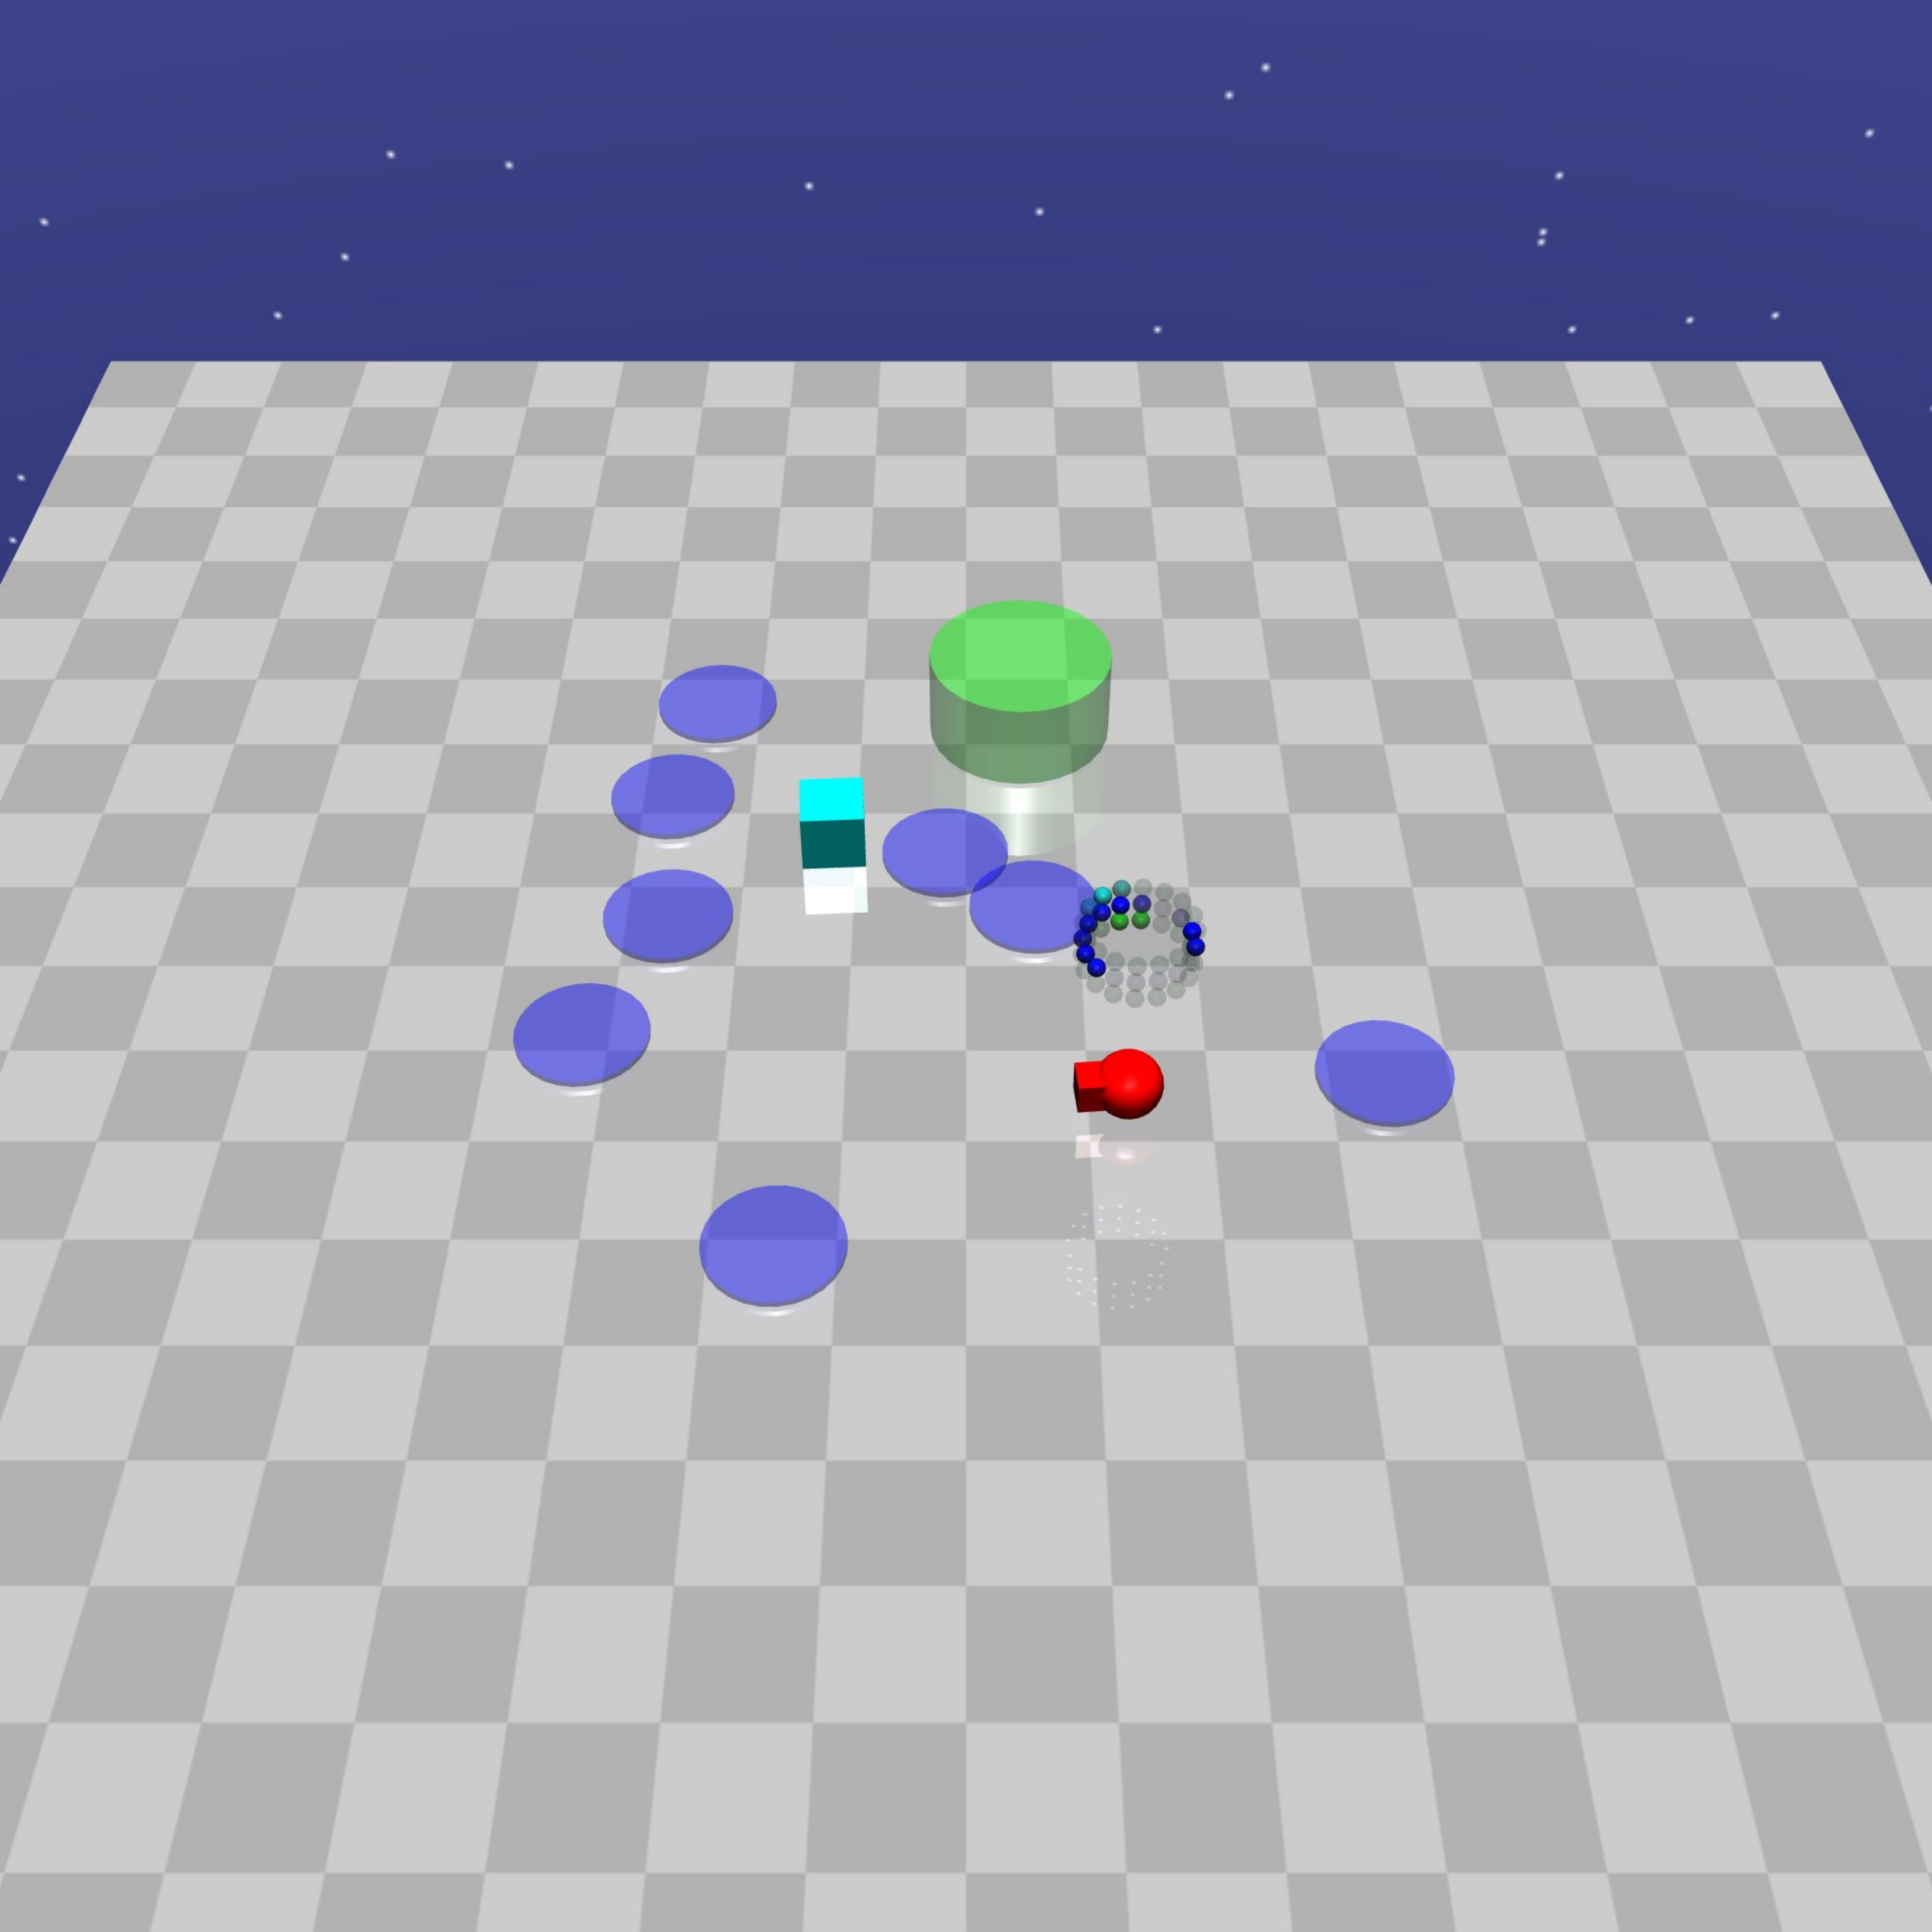

Supplement: supplementary_material [file attachment]

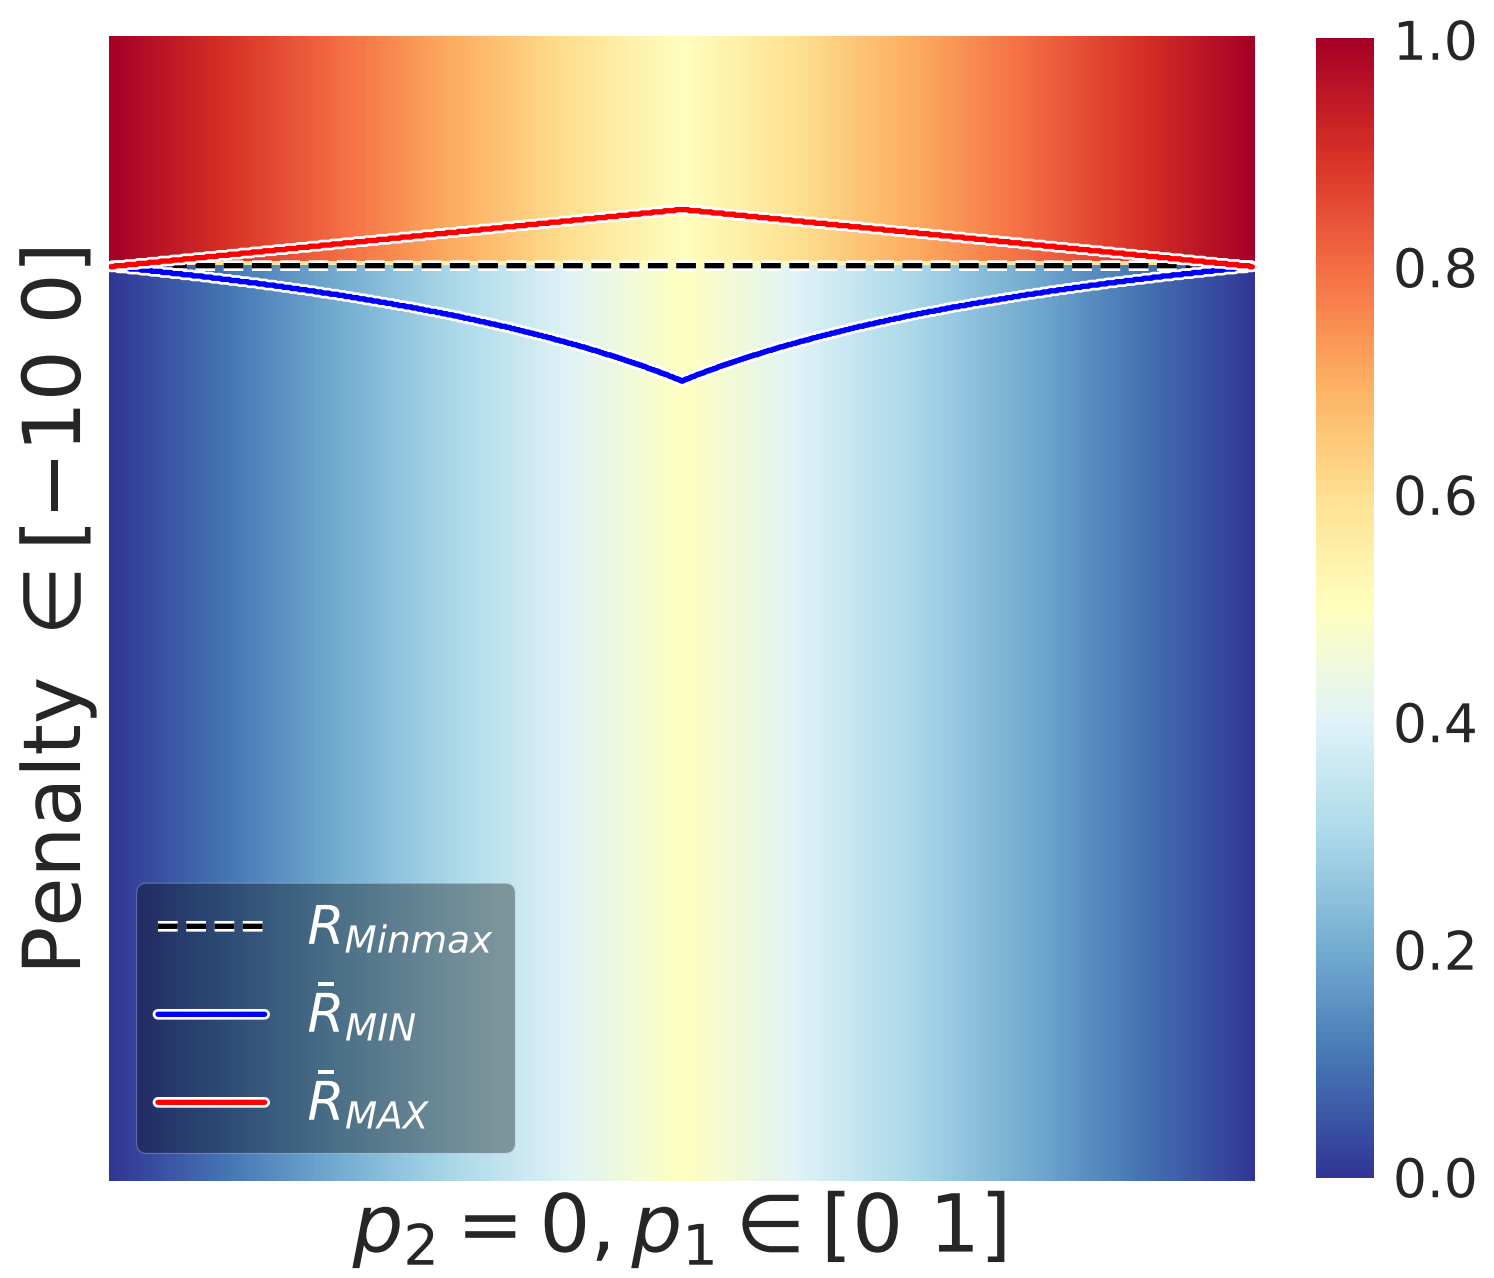

Supplement: supplementary_material [file attachment]

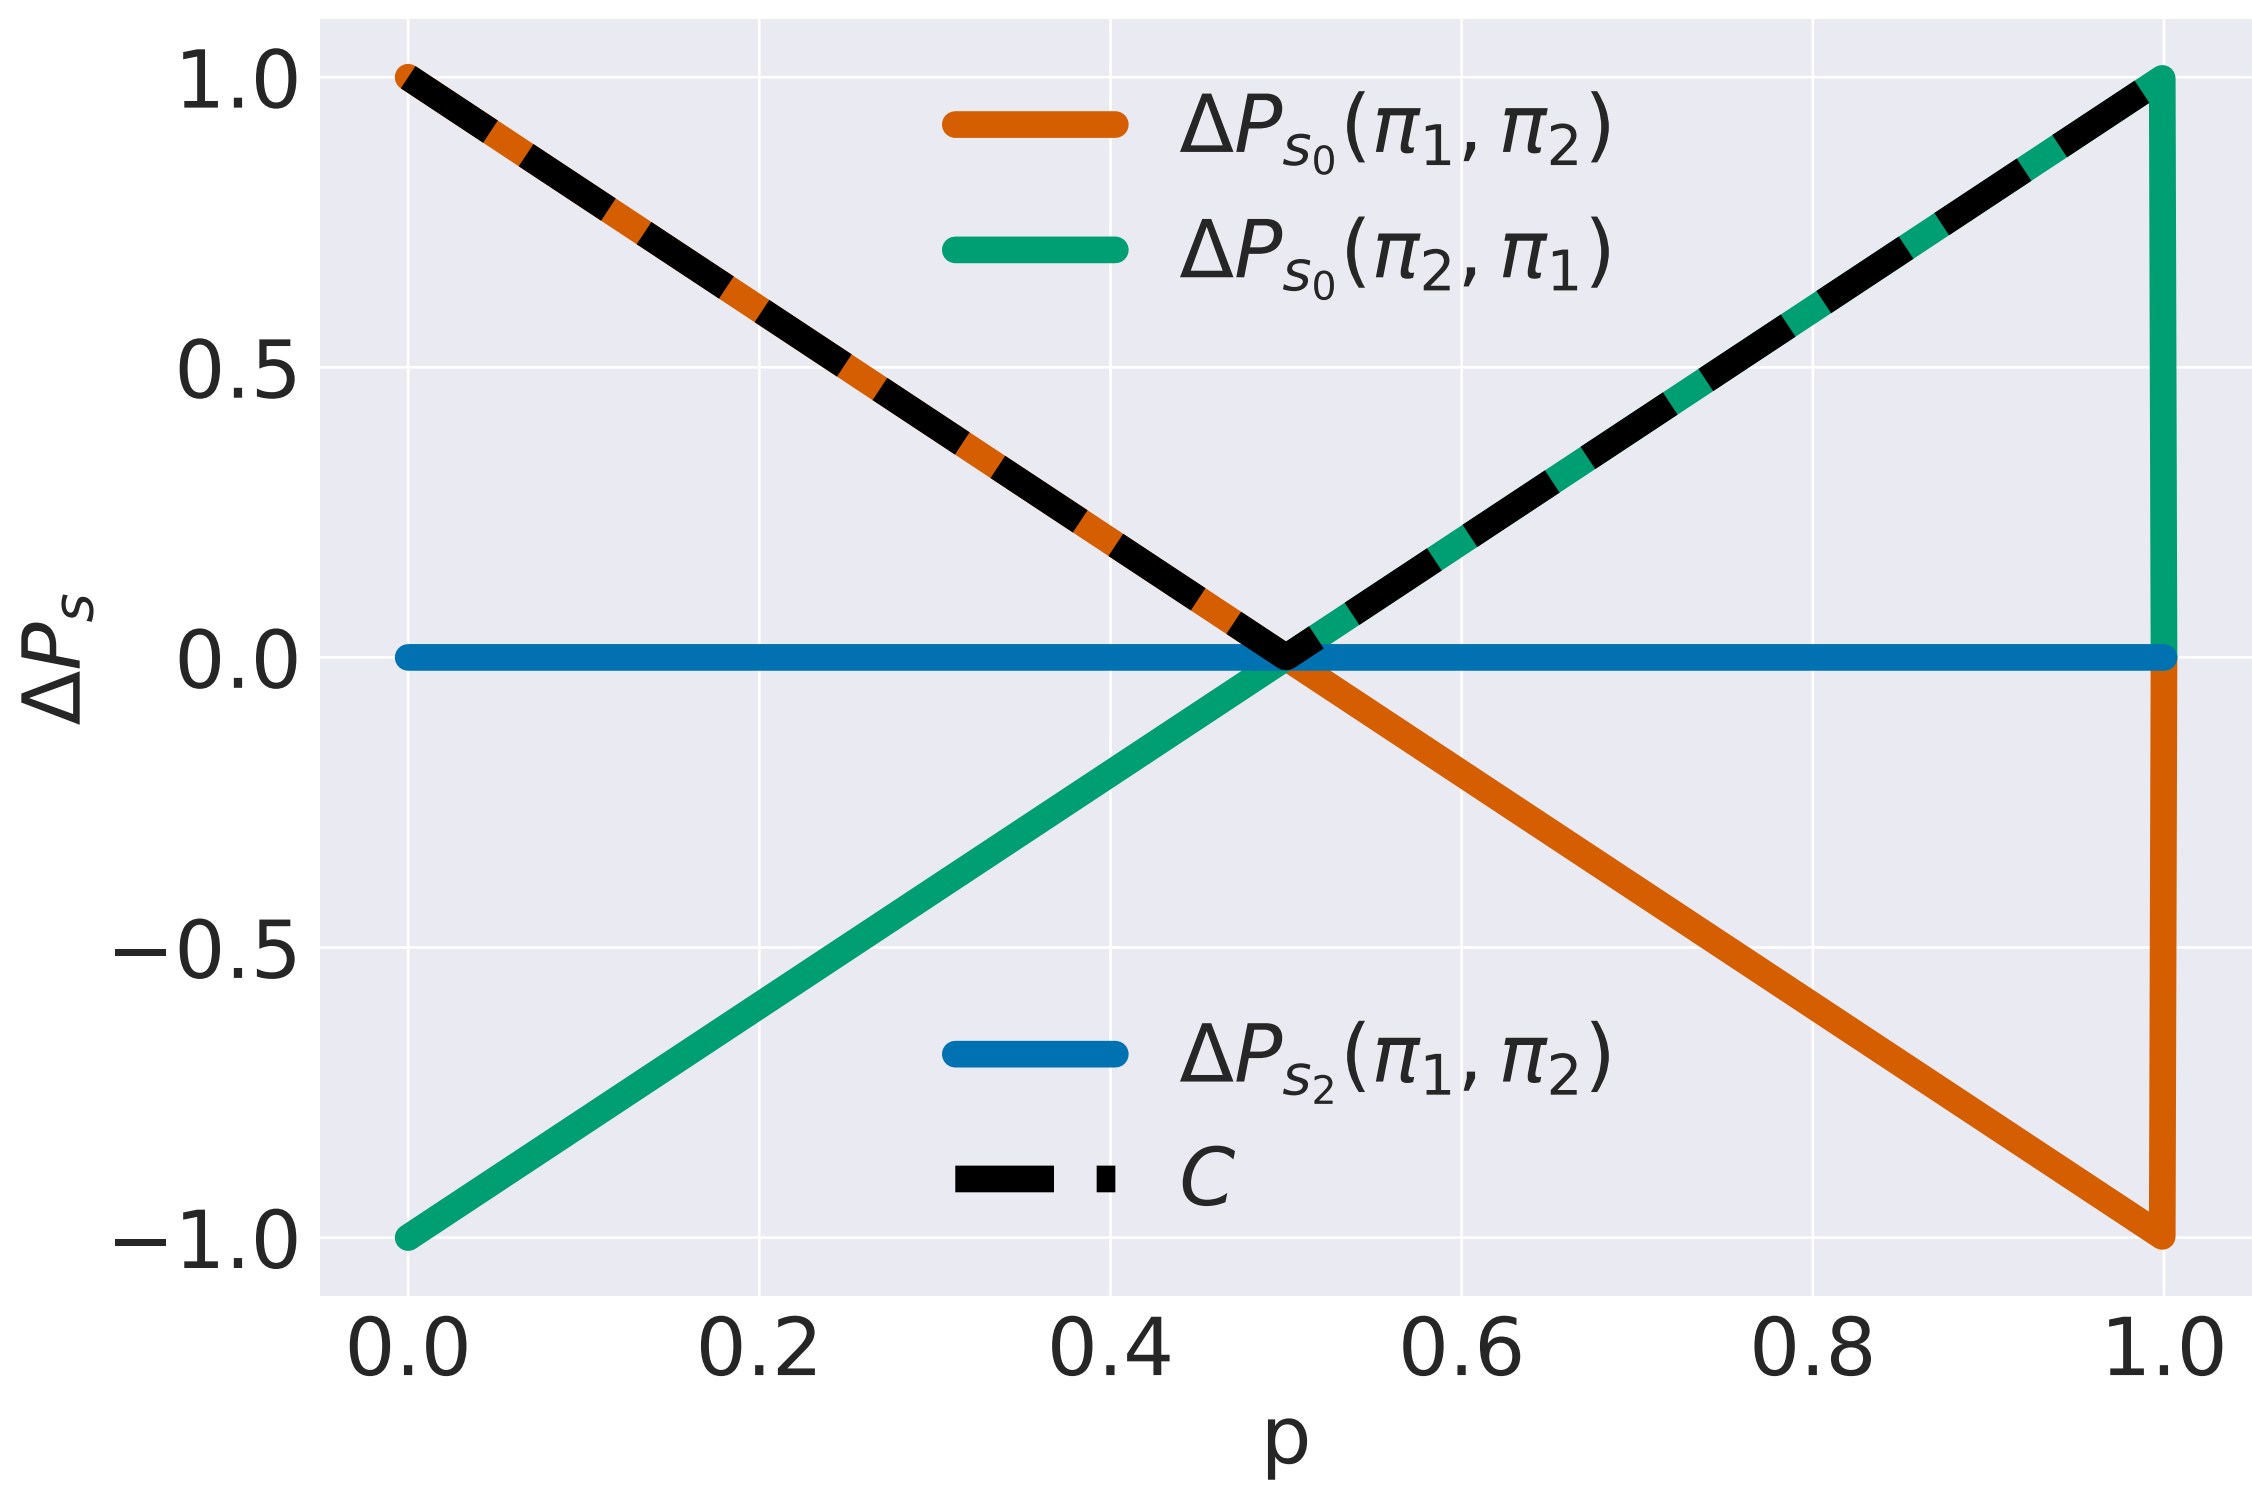

Supplement: supplementary_material [file attachment]

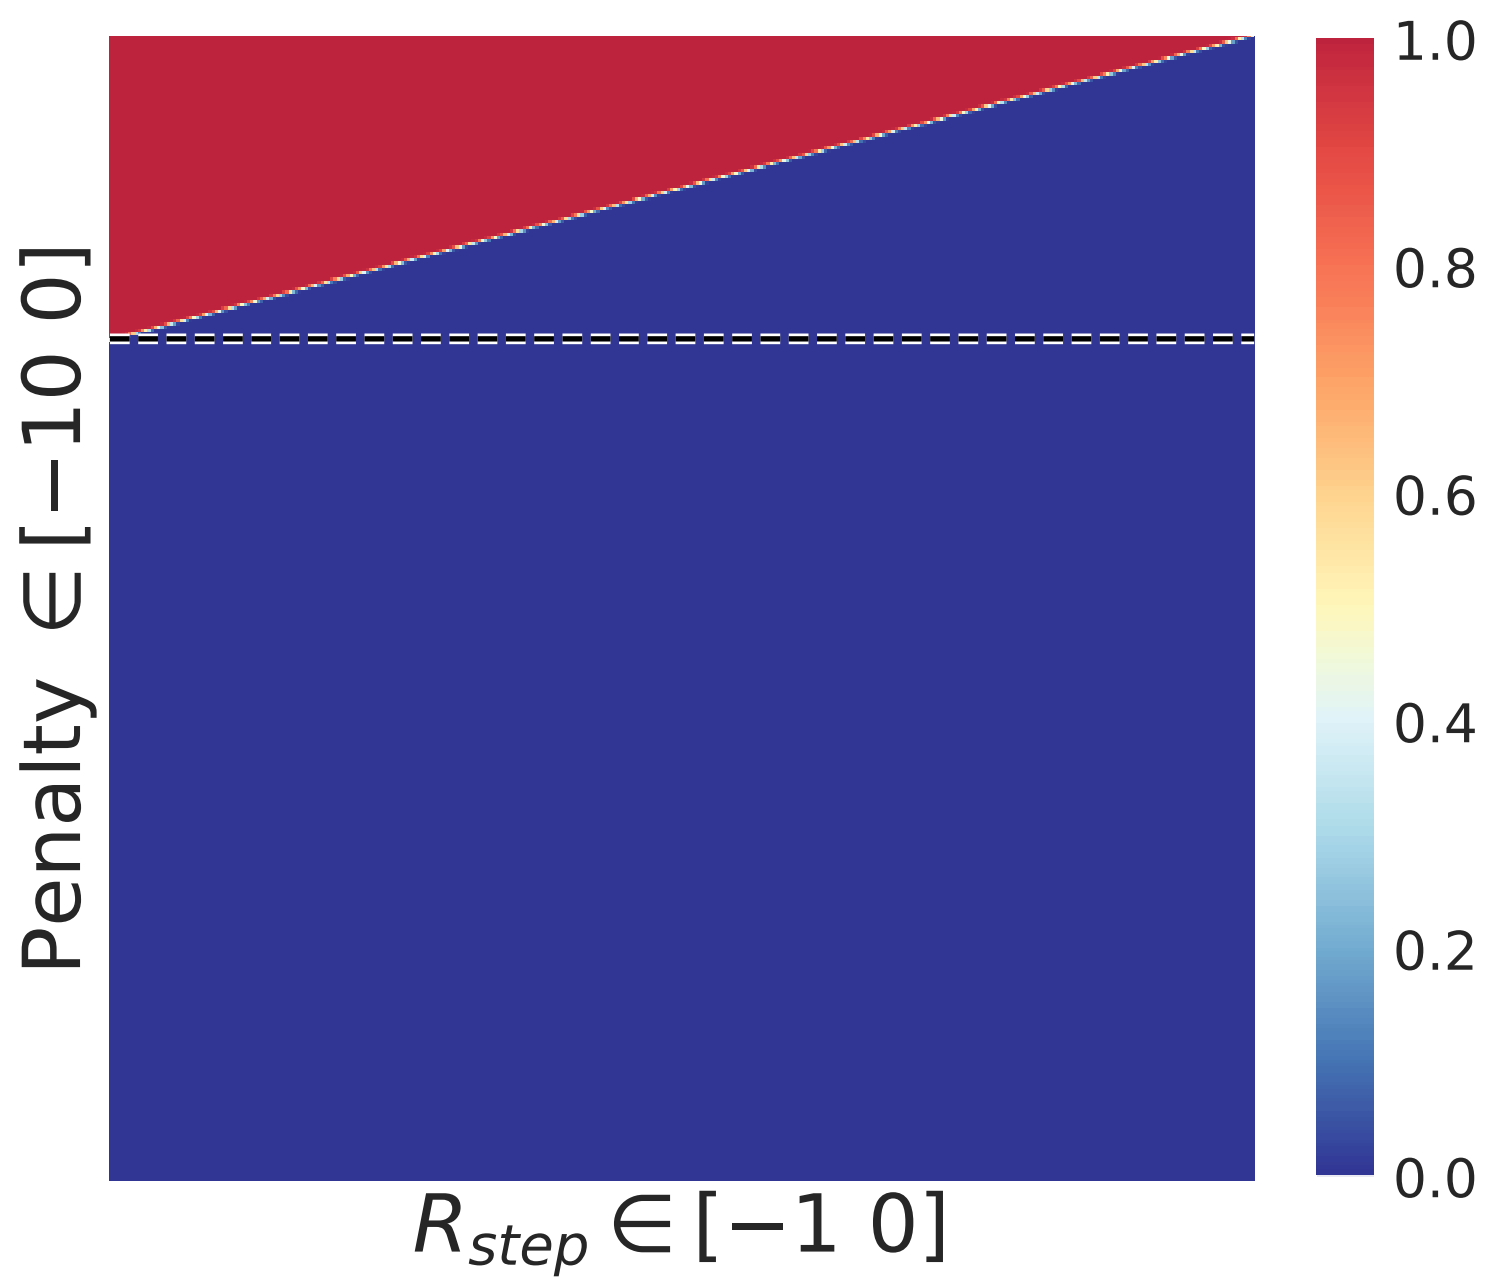

Supplement: supplementary_material [file attachment]

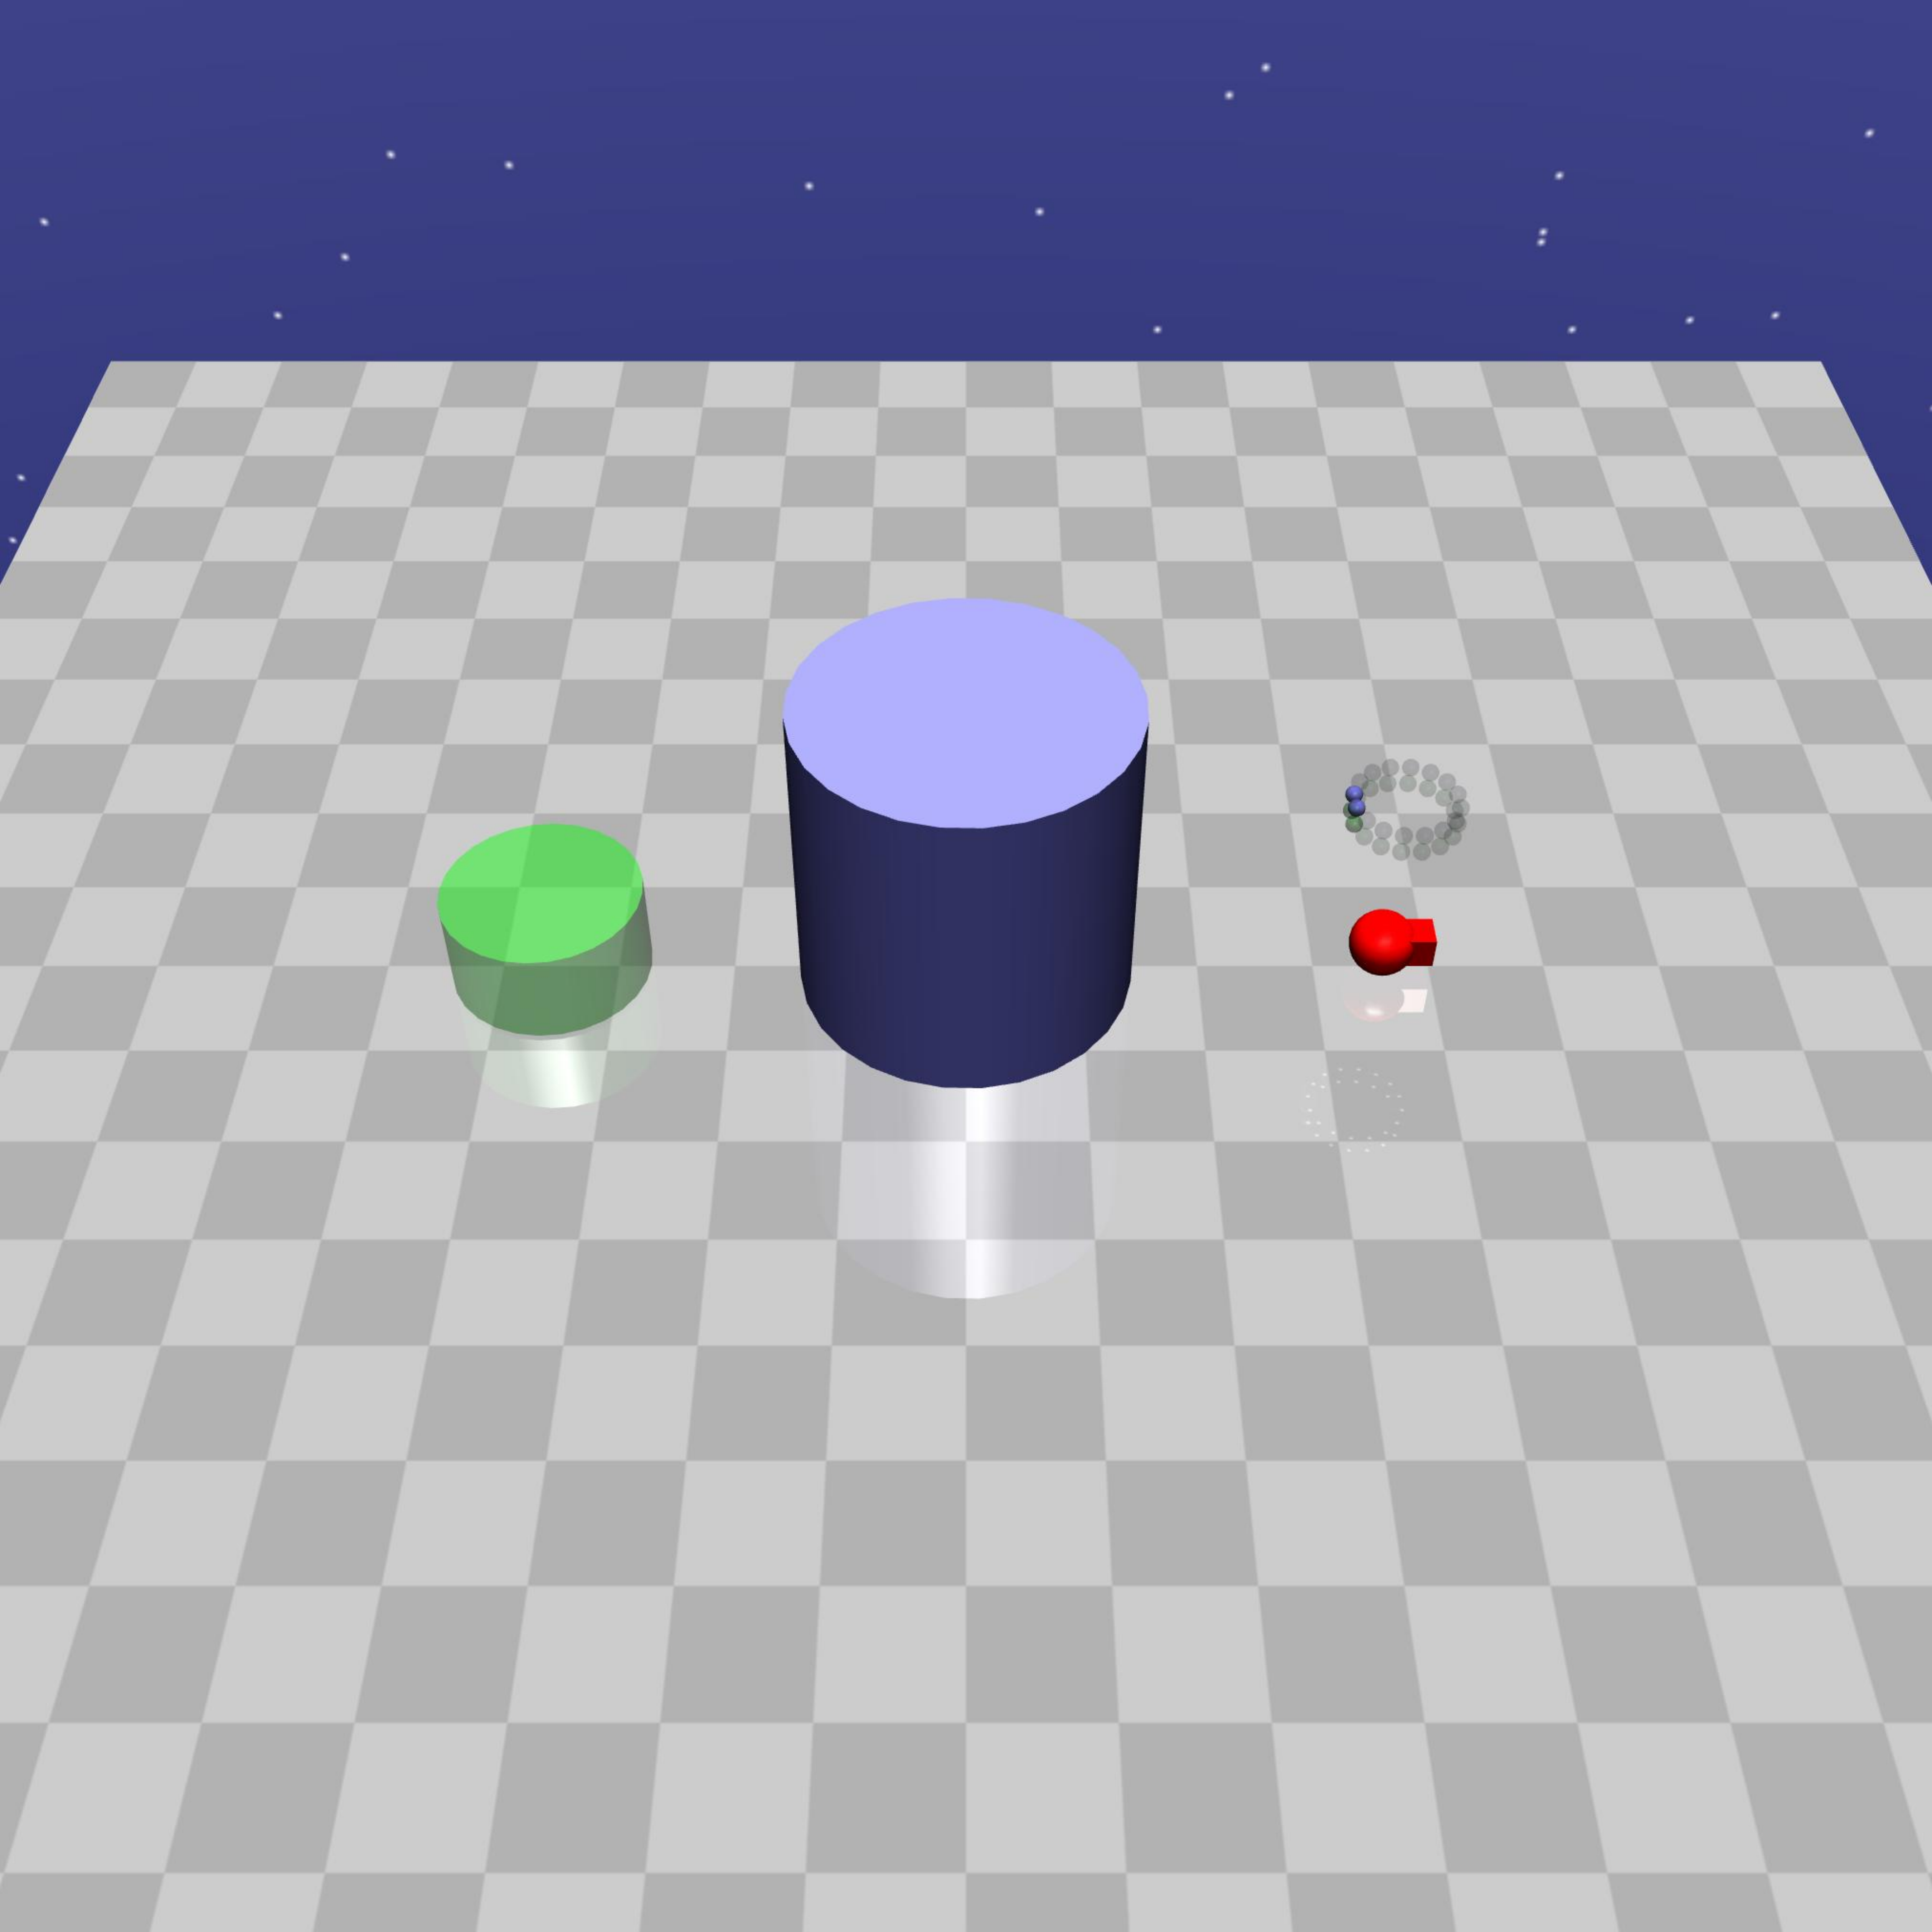

Supplement: supplementary_material [file attachment]

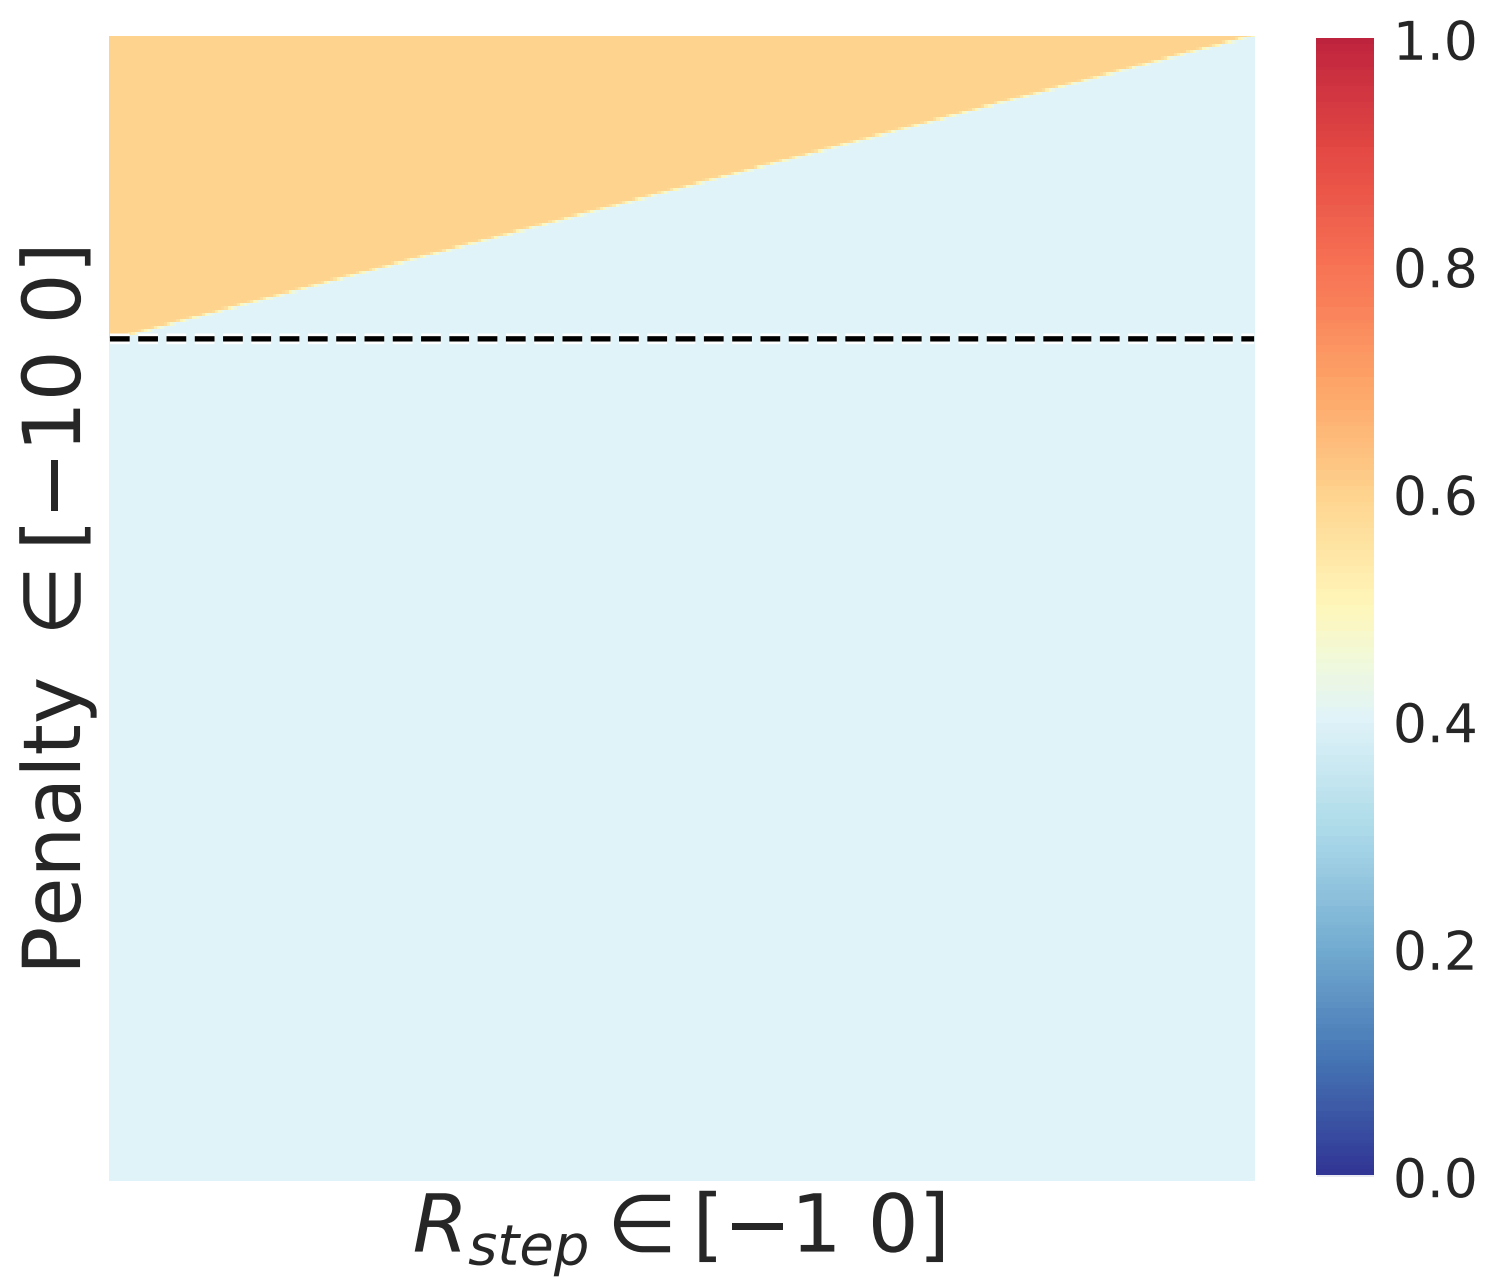

Supplement: supplementary_material [file attachment]

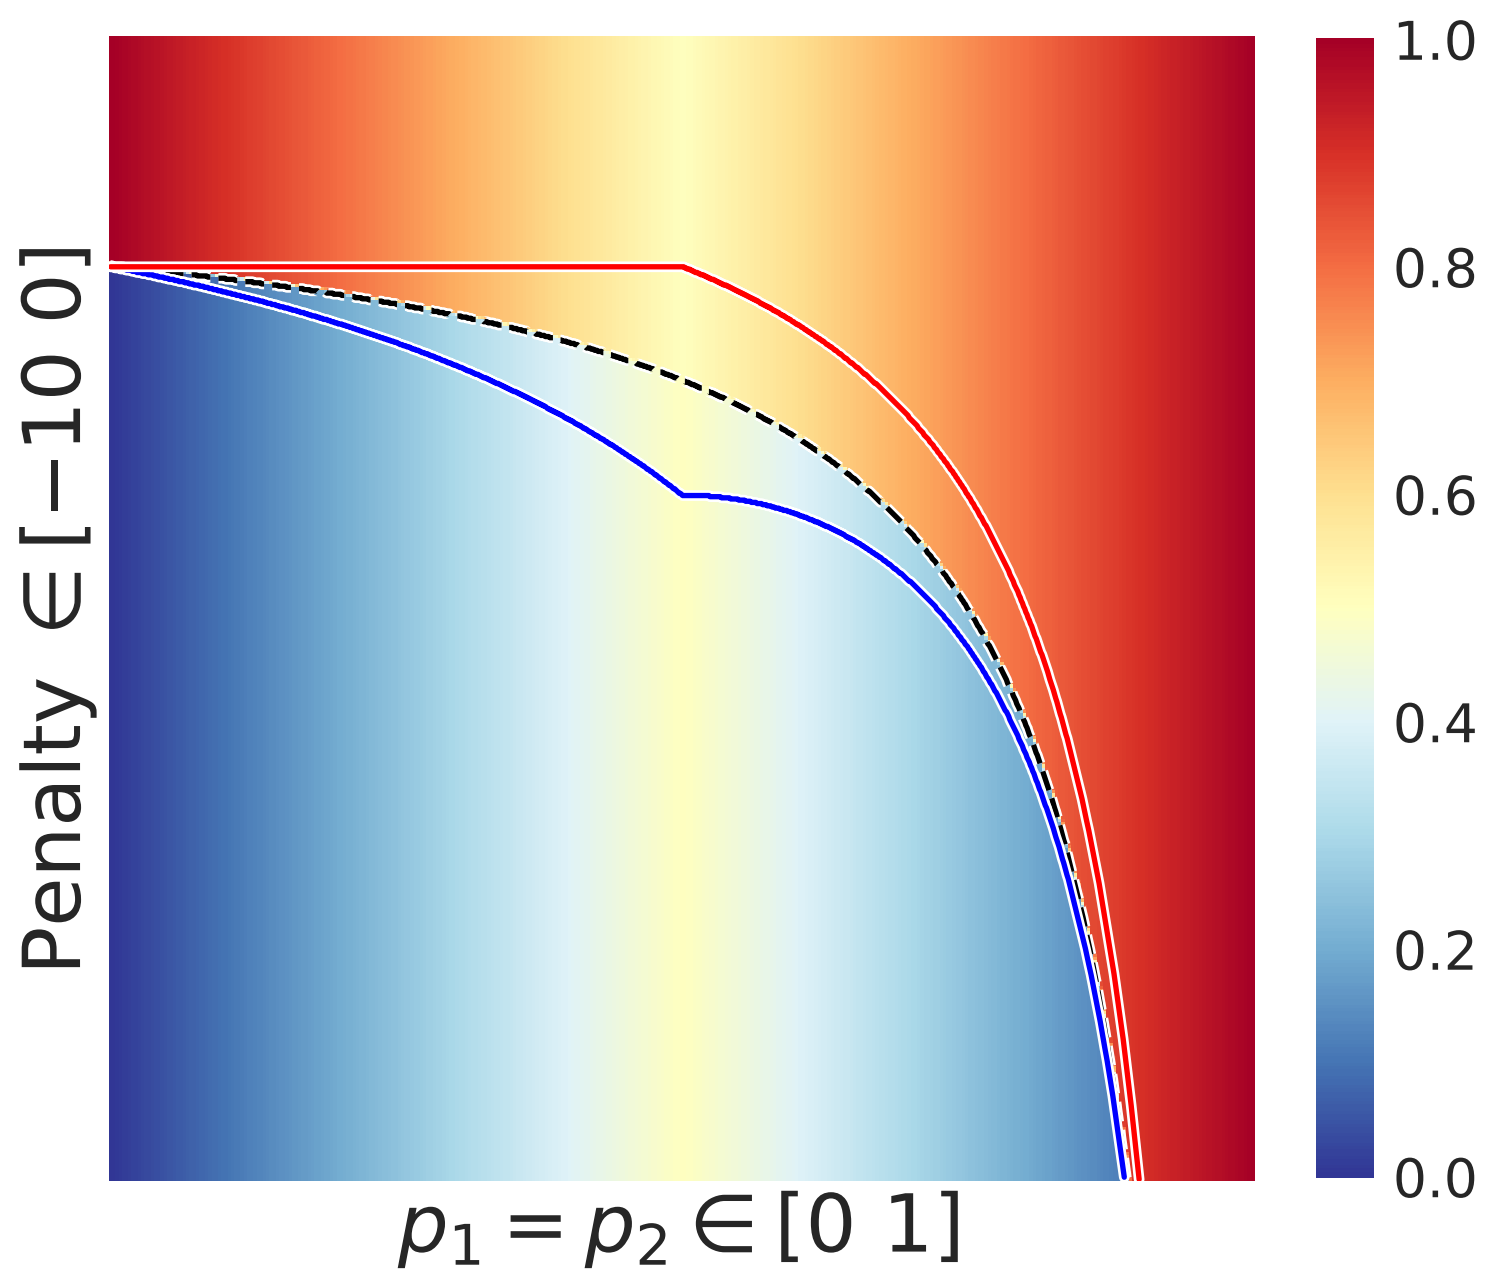

Supplement: supplementary_material [file attachment]

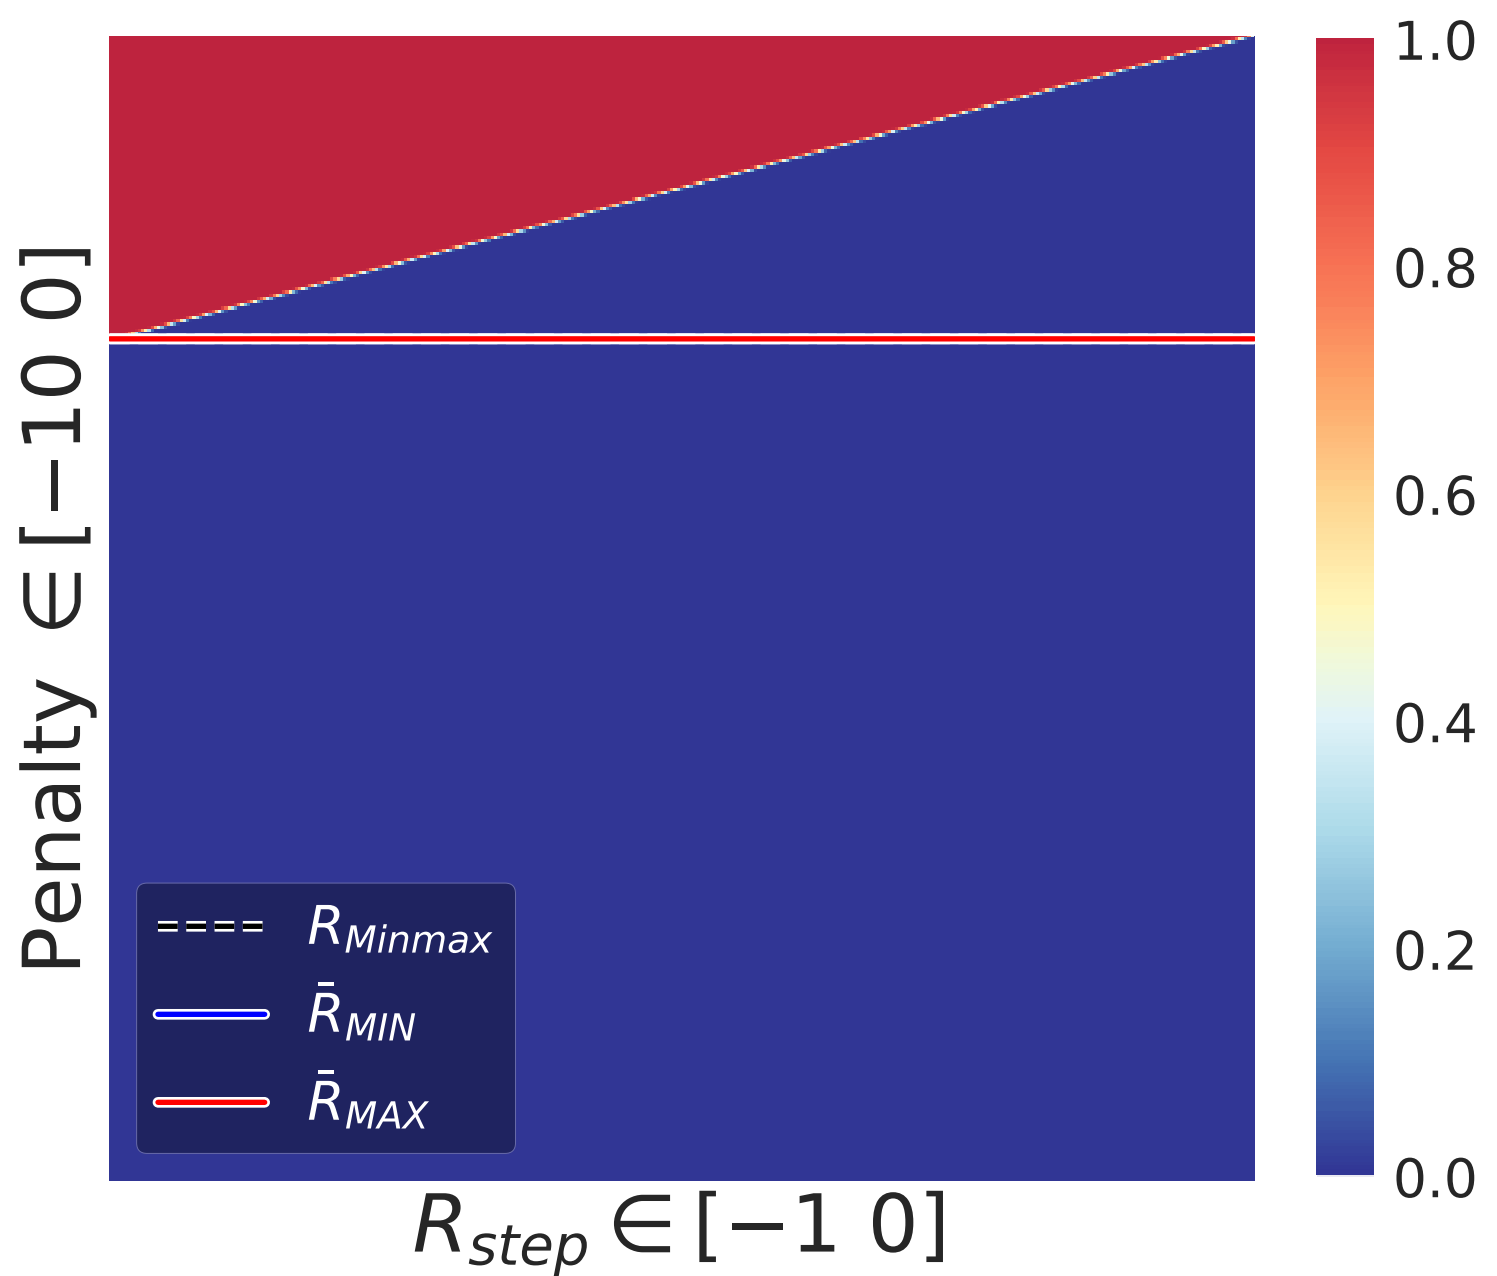

Supplement: supplementary_material [file attachment]

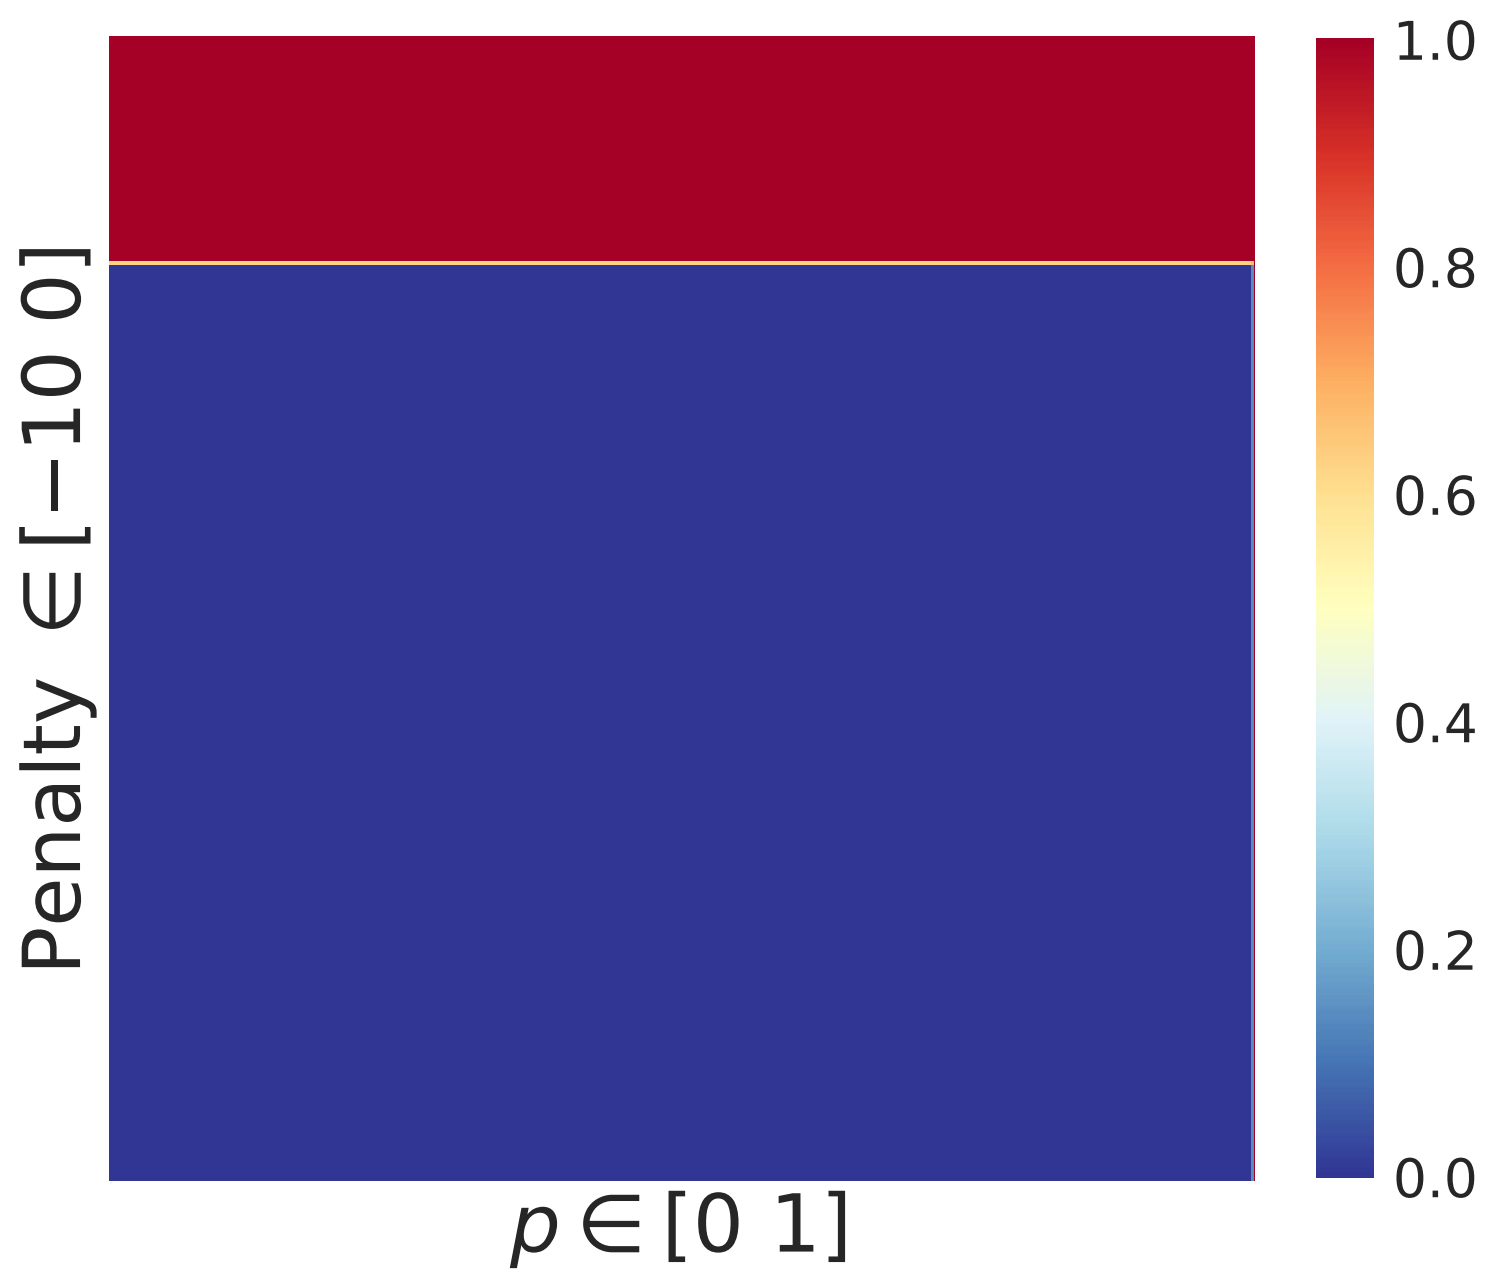

Supplement: supplementary_material [file attachment]

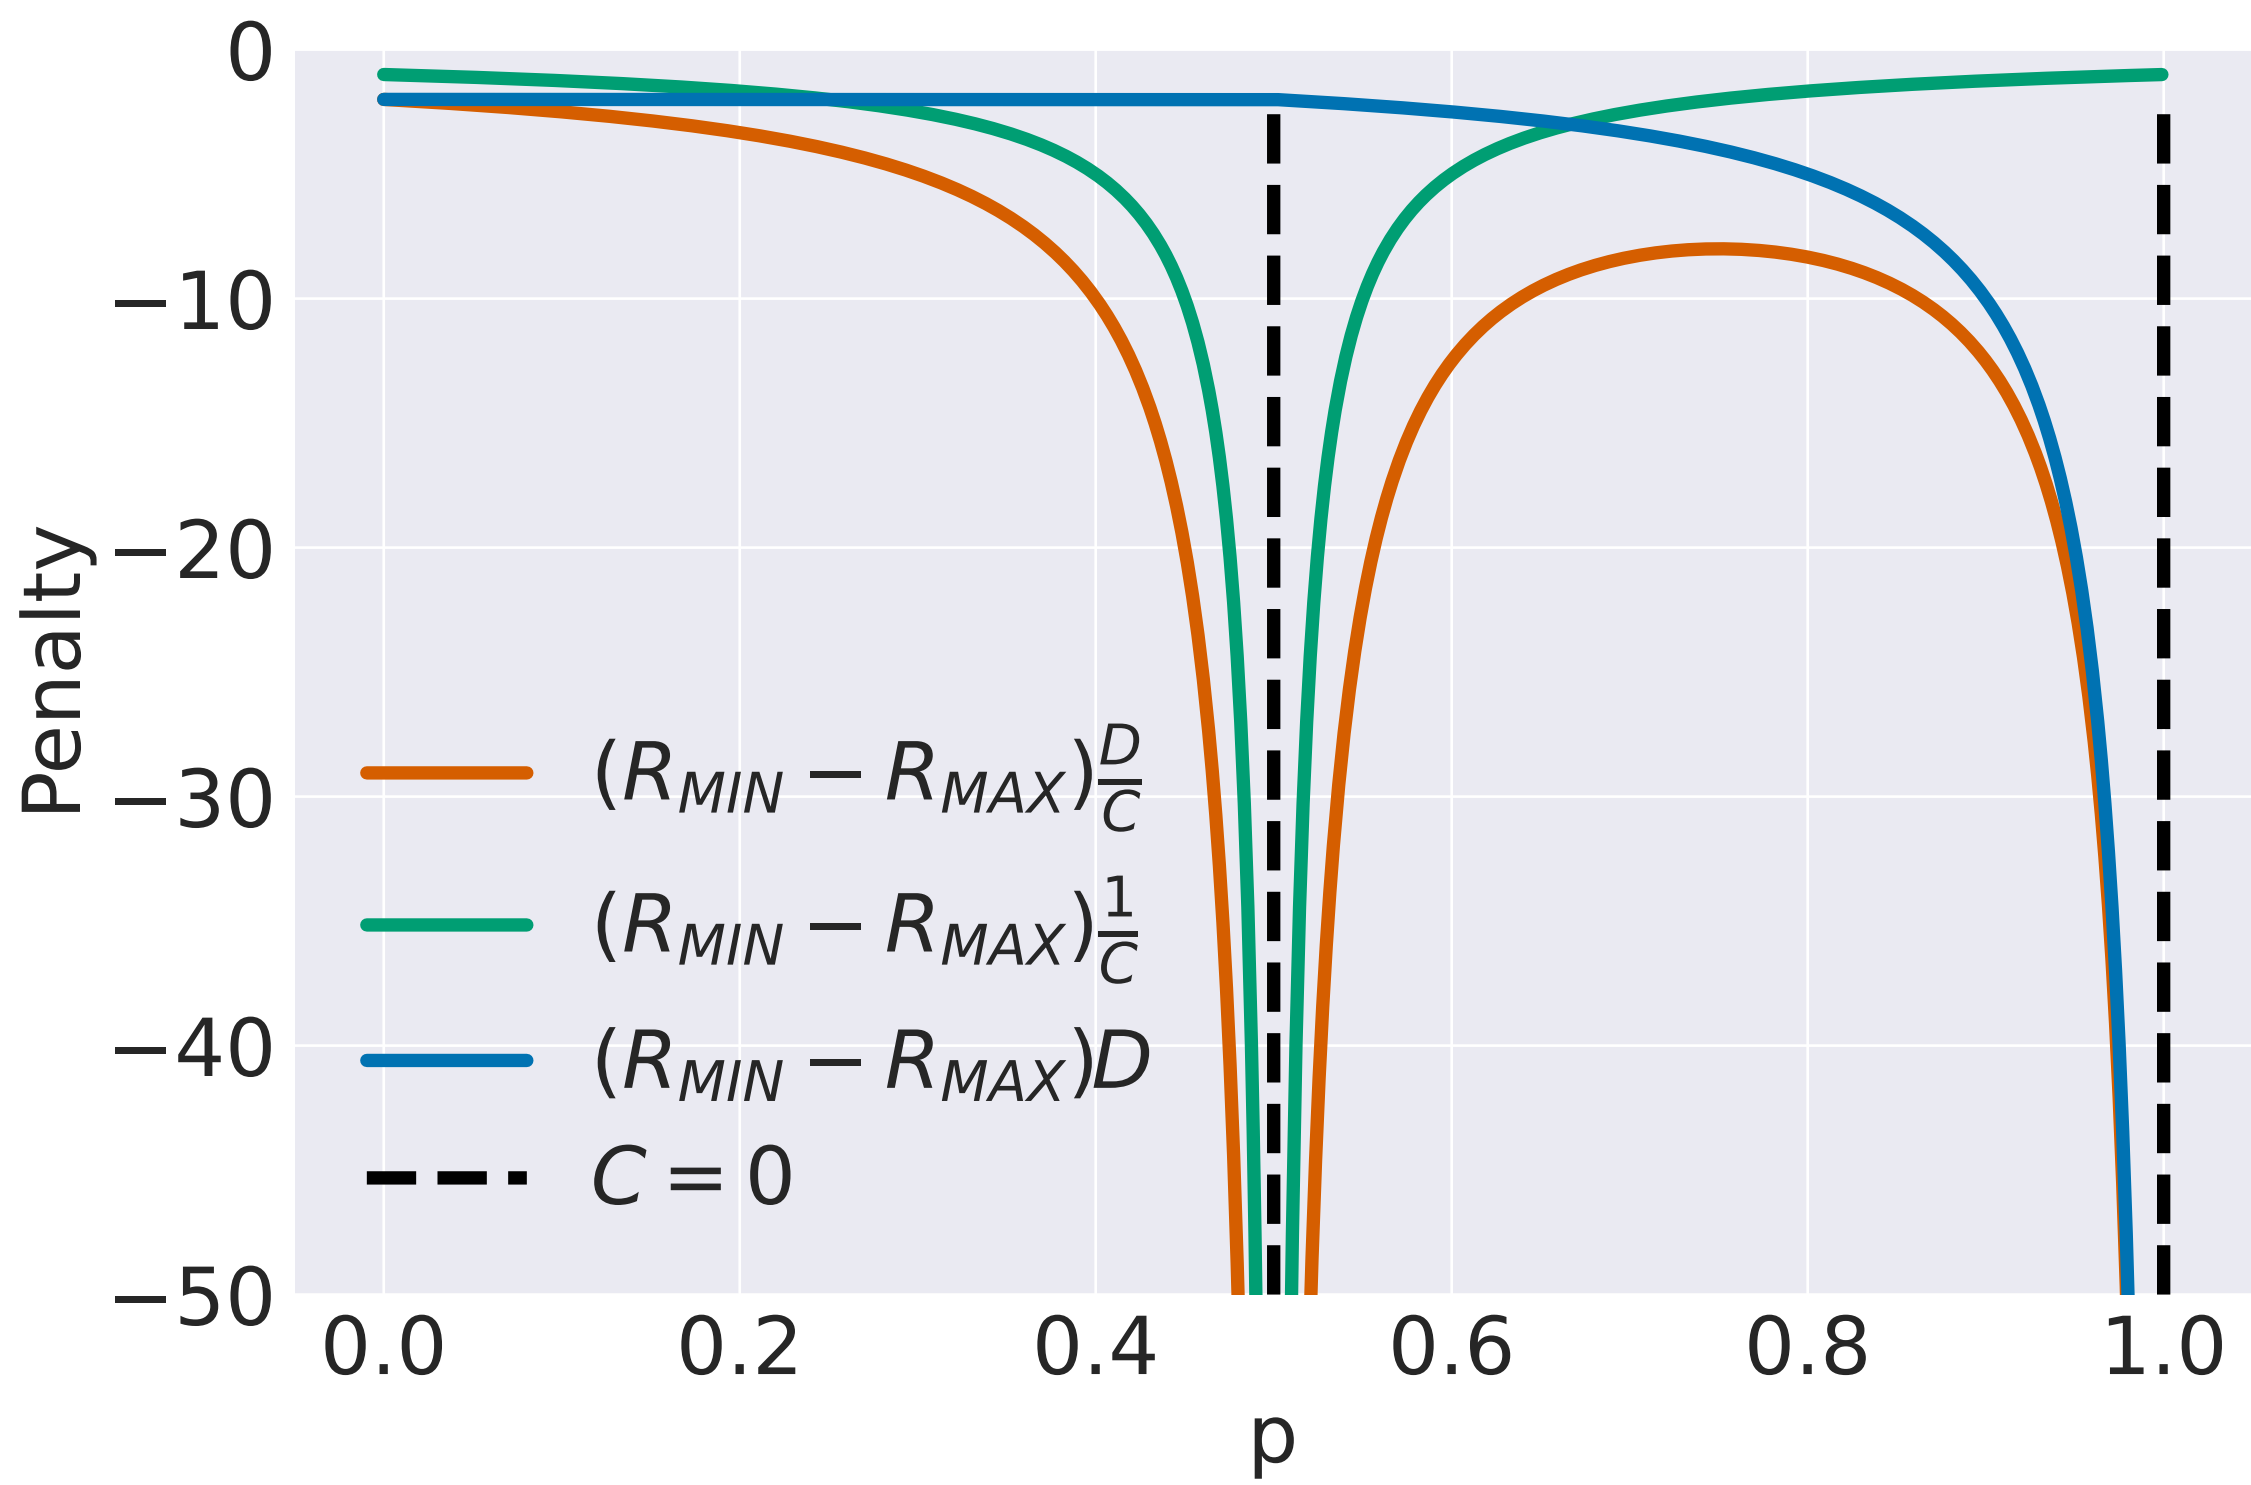

Supplement: supplementary_material [file attachment]

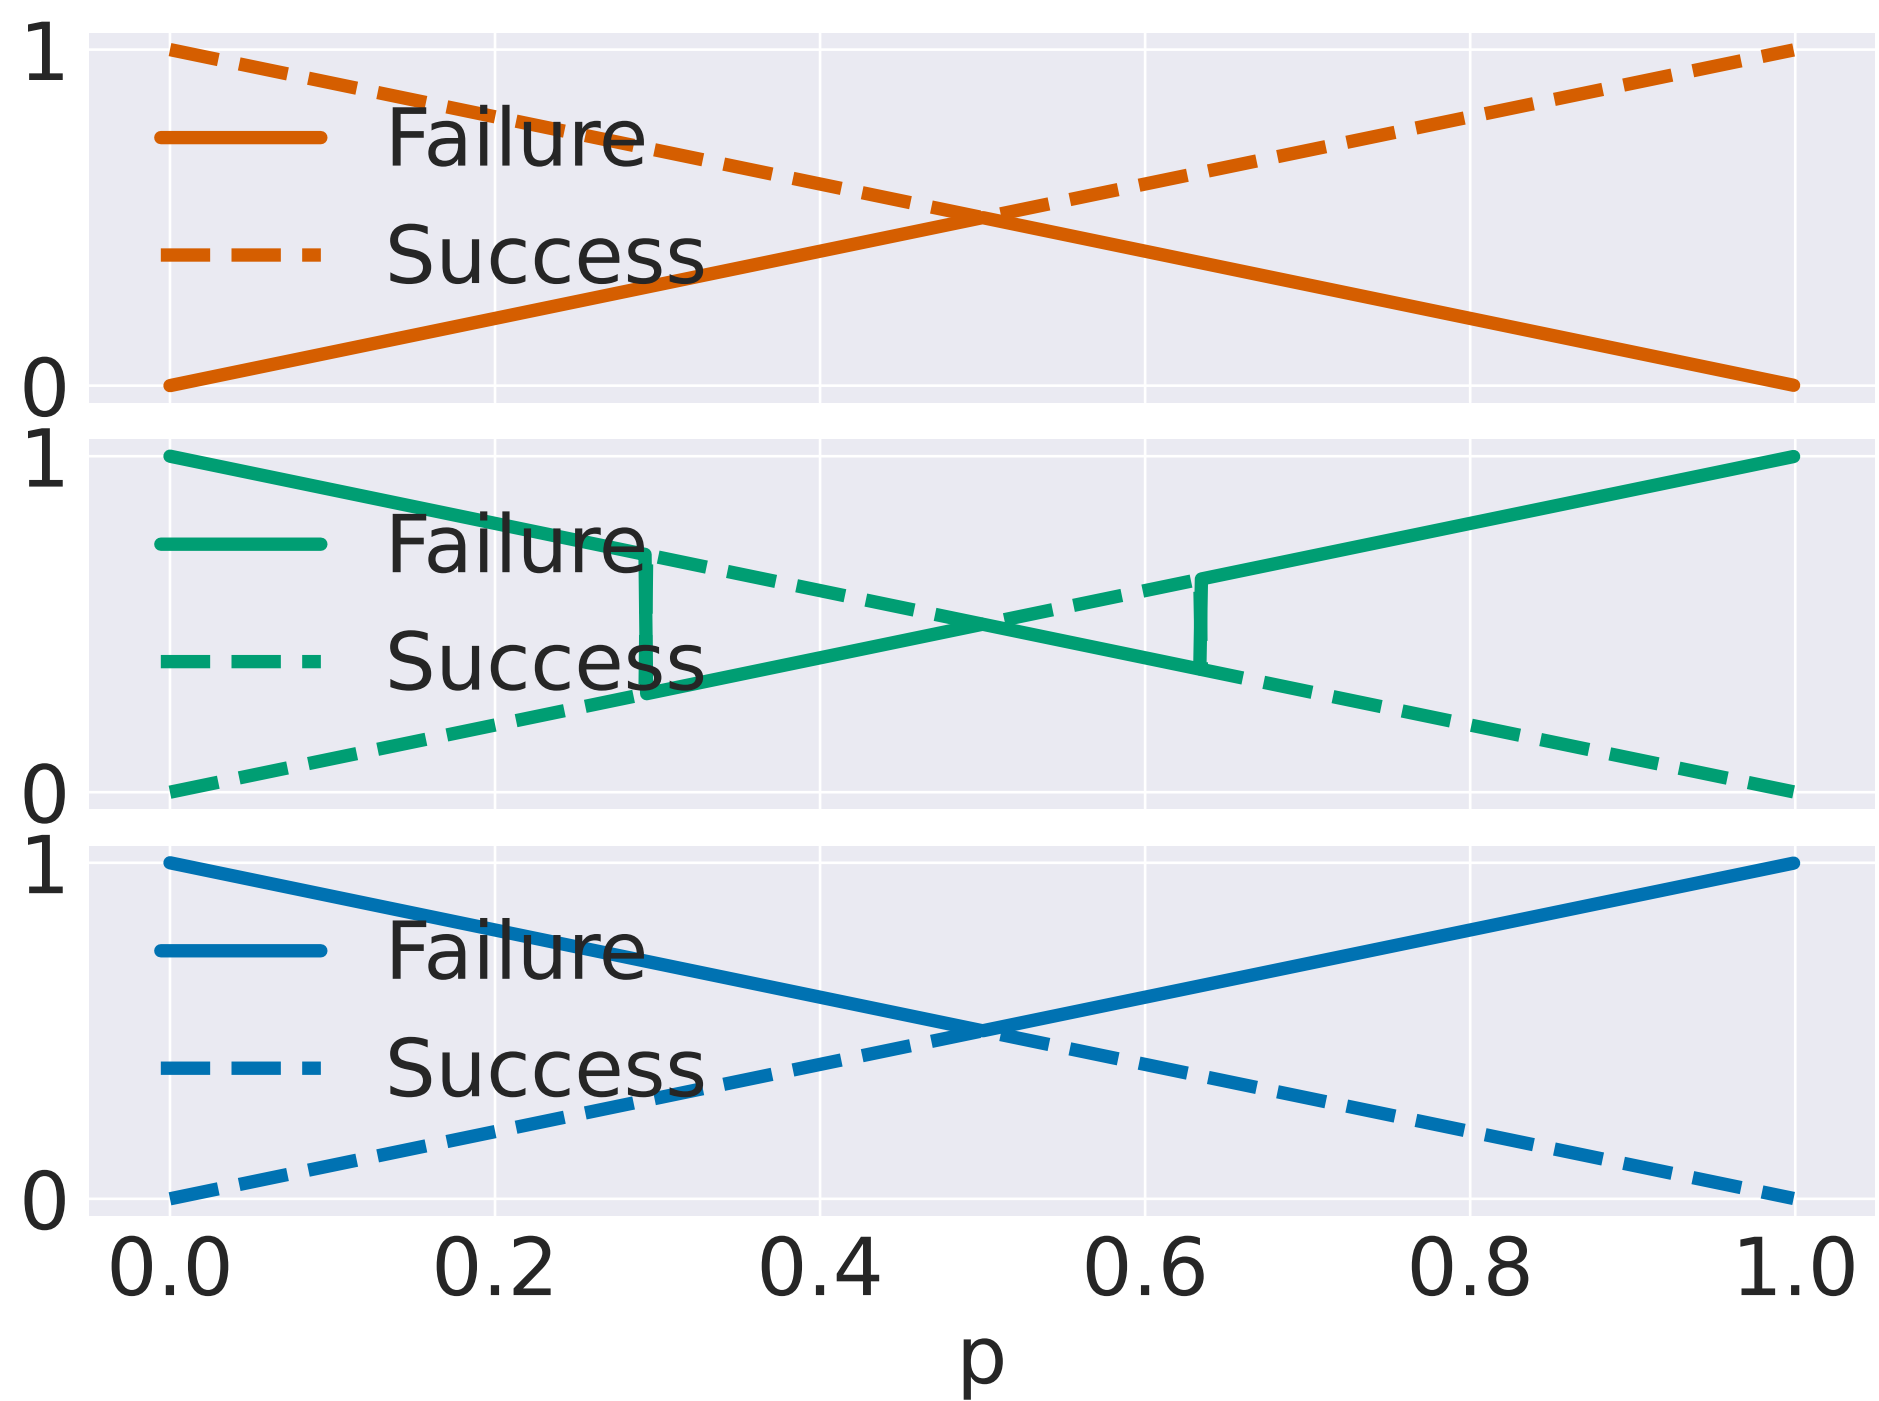

Supplement: supplementary_material [file attachment]

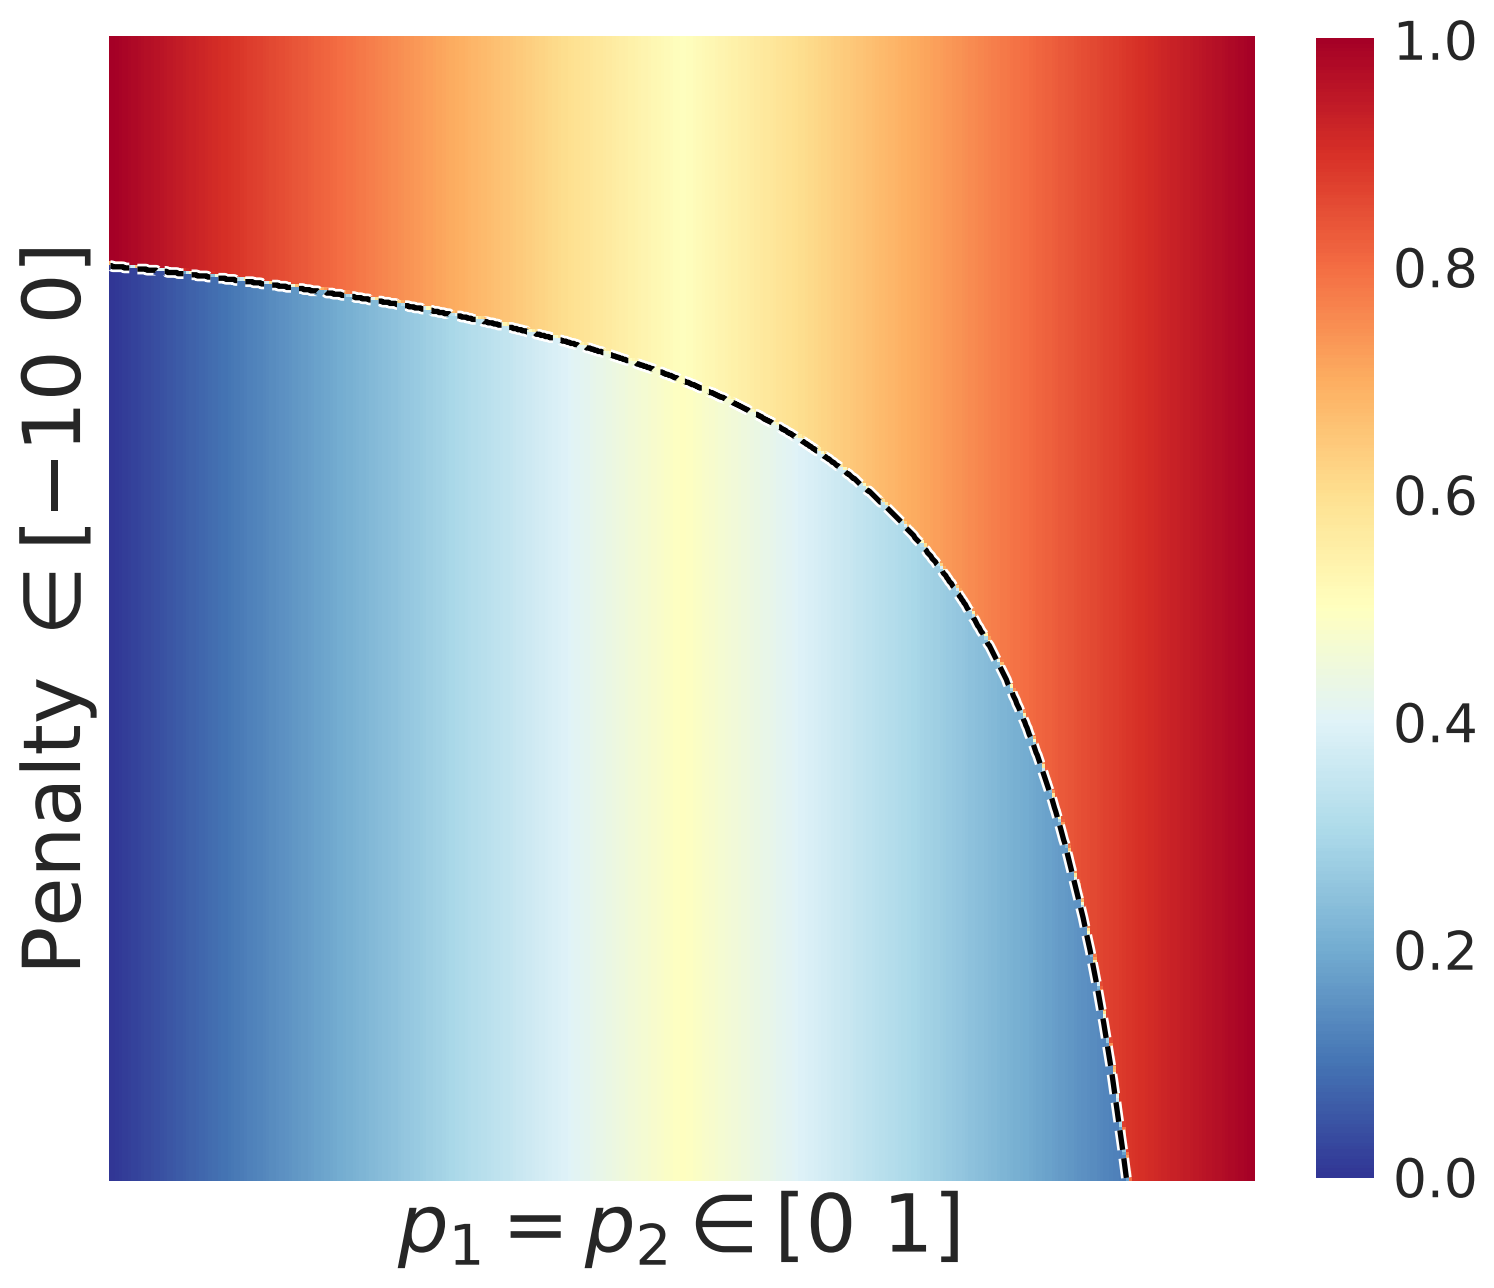

Supplement: supplementary_material [file attachment]
